# Supplementary material for: The stereoselective formation of β-lactams with acyl ketenes generated from 5-acyl-Meldrum's acids
Source: Royal Society of Chemistry journal article supplement (doi:10.1039/c6nj00884d), 2016-01-01
Supplement: c6nj00884d1.pdf [file c6nj00884d1.pdf]

# Stereoselective Formation of $\beta$ -Lactams with Acyl Ketenes Generated from 5-Acyl-Meldrum's Acids.

Anna Zakaszewska, Ewelina Najda, Sławomir Makowiec\*.

Department of Organic Chemistry, Faculty of Chemistry, Gdansk University of Technology, Narutowicza 11/12, 80-233 Gdansk, Poland

\*Corresponding Author: [mak@pg.gda.pl](mailto:mak@pg.gda.pl).

## Supporting Information

### CONTENTS

|              |                                                   |
|--------------|---------------------------------------------------|
| Page S2      | General Information                               |
| Page S3-S12  | Experimental Procedures and Characterization Data |
| Page S13-S22 | $^1\text{H}$ and $^{13}\text{C}$ -NMR Spectra     |
| Page S22-S23 | References                                        |

## General Information

Reagents were purchased from Sigma-Aldrich or Acros. Toluene was distilled from potassium under argon and stored over molecular sieves. Chlorobenzene, DCE and nitromethane were distilled over P<sub>4</sub>O<sub>10</sub> and stored over molecular sieves. Commercially unavailable reagents were prepared according to literature procedures: 5-[hydroxy(phenyl)methylene]-2,2-dimethyl-1,3-dioxo-4,6-dione **1a** [1], 5-[hydroxy(1-naphthylmethyl)methylene]-2,2-dimethyl-1,3-dioxo-4,6-dione **1b** [2], (*R*)-*N*-benzylidene-1-phenylethanamine **2aa**, racemic *N*-benzylidenebutan-2-amine **2ab**, (*R*)-*N*-(4-chlorobenzylidene)-1-phenylethanamine **2ba**, (*R*)-*N*-benzylidene-1-(naphthalen-1-yl)ethanamine **2ac**, (*R*)-*N*-benzylidene-1-(naphthalen-2-yl)ethanamine **2ad** [3]. Analytical TLC was performed on aluminum sheets of silica gel UV-254 Merck. Flash chromatography was performed using 40-63 microns of Zeochem silica gel. The <sup>1</sup>H, <sup>13</sup>C were recorded on Varian Gemini 200 and Varian Unity Plus 500, chemical shifts ( $\delta$ ) in ppm rel. to internal Me<sub>4</sub>Si; coupling constants *J* in Hz. High-resolution (HRMS) was recorded on *MicroMas Quattro LCT* mass spectrometer. Melting points were determined with *Warsztat Elektromechaniczny W-wa* apparatus and are not corrected. Ratio of diastereoisomers was determined based on isolated yields as well as by integration of <sup>1</sup>H spectra.

## Experimental Procedures and Characterization Data

### Stereoselective preparation of azetidin-2-ones. General Procedure

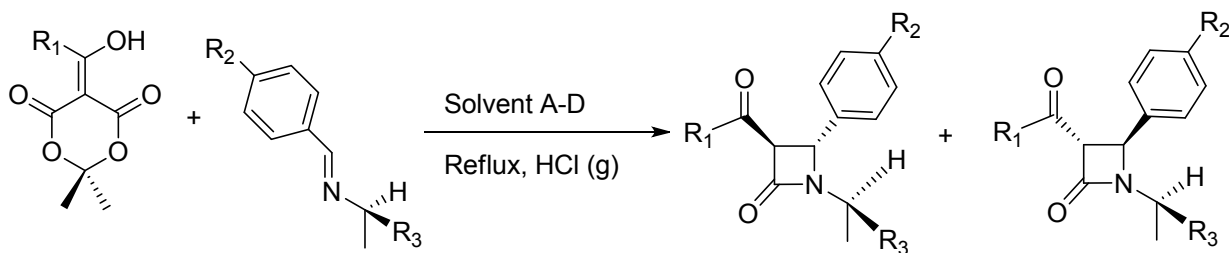

To a solution of **1a-b** (1 mmol) in dry solvent (toluene (A), DCE (B), chlorobenzene (C) or nitromethane (D)) was added aldimine **2aa-bd** (1.5 mmol). The reaction mixture was cooled to 0°C and saturated with dry HCl over 20 min. The resulting mixture was stirred and heated to reflux for the time specified in Table 1 and 2. After completion of the reaction, the solvent was removed under vacuum, and the residue was purified as specified below.

### 3-Benzoyl-4-phenyl-1-(1-phenylethyl)azetidin-2-one (**3aaa**), (**4aaa**)

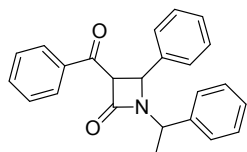

Table 2, Entry 1. Purification with flash chromatography  $R_f$  0.30 (EtOAc:Hex 1:8, SiO<sub>2</sub>) gave (71 mg, 0.20 mmol, 20%) as three fractions respectively, I diastereoisomer (**3aaa**) (9 mg, 0.03 mmol, 3%, yellow oil), mixture of two diastereoisomers (51 mg, 0.14 mmol, 14%, ratio **3aaa** : **4aaa**, 13:87, yellow oil) and II diastereoisomer (**4aaa**) (11 mg, 0.03 mmol, 3%, yellow oil). Overall *de* = 54%. Table 2, Entry 2.

Purification with flash chromatography  $R_f$  0.30 (EtOAc:Hex 1:8, SiO<sub>2</sub>) gave one fraction, mixture of two diastereoisomers (89 mg, 0.25 mmol, 25%, ratio **3aaa** : **4aaa**, 65:35, yellow oil). Overall *de* = 30%. **I diastereoisomer (3aaa)** <sup>1</sup>H-NMR (500 MHz, CDCl<sub>3</sub>)  $\delta$ : 8.08-8.07 (m, 2H, ArH), 7.60-7.57 (m, 1H, ArH), 7.50-7.47 (m, 2H, ArH), 7.35-7.31 (m, 3H, ArH), 7.30-7.23 (m, 5H, ArH), 7.23-7.18 (m, 2H, ArH), 5.09 (d, *J* = 2.4 Hz, 1H, H-4), 4.74 (d, *J* = 2.4 Hz, 1H, H-4), 4.41 (q, *J* = 7.4 Hz, 1H, CH<sub>3</sub>CH), 1.81 (d, *J* = 7.4 Hz, 1H, CH<sub>3</sub>); <sup>13</sup>C-NMR (125 MHz, CDCl<sub>3</sub>)  $\delta$ : 191.6, 163.3, 140.8, 137.3, 136.2, 134.0, 129.4, 129.2, 128.9, 127.9, 127.4, 127.3, 127.1, 127.0, 68.3, 55.5, 55.1, 20.1; **HRMS** (ESI<sup>+</sup>): *m/z* calcd for C<sub>24</sub>H<sub>21</sub>NO<sub>2</sub>Na [M+Na]<sup>+</sup> 378.1470, found. 378.1478. **II diastereoisomer (4aaa)** <sup>1</sup>H-NMR (500 MHz, CDCl<sub>3</sub>)  $\delta$ : 8.06-8.04 (m, 2H, ArH), 7.58-7.55 (m, 1H, ArH), 7.48-7.45 (m, 2H, ArH), 7.36-7.30 (m, 7H, ArH), 7.29-7.24 (m, 3H, ArH), 5.10 (d, *J* = 2.4 Hz, 1H, H-4), 4.93 (q, *J* = 7.3 Hz, 1H, CH<sub>3</sub>CH), 4.74 (d, *J* = 2.4 Hz, 1H, H-3), 1.41 (d, *J* = 7.4 Hz, 1H, CH<sub>3</sub>); <sup>13</sup>C-NMR (125 MHz, CDCl<sub>3</sub>)  $\delta$ : 191.4, 163.3, 139.8, 138.4, 136.2, 134.0, 129.4, 129.2, 129.1, 129.0, 128.8, 128.1, 127.5, 127.2, 68.2, 55.9, 53.6, 19.5; **HRMS** (ESI<sup>+</sup>): *m/z* calcd for C<sub>24</sub>H<sub>21</sub>NO<sub>2</sub>Na [M+Na]<sup>+</sup> 378.1470, found. 378.1478

### 2,6-diphenyl-3-(1-phenylethyl)-2H-1,3-oxazin-4(3H)-one (**5aaa**), (**6aaa**)

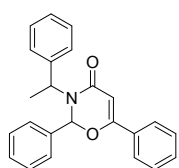

Table 1, Entry 5. Purification with flash chromatography  $R_f$  0.30 (EtOAc:Hex 1:4, SiO<sub>2</sub>) gave (78 mg, 0.22 mmol, 22%) as two fractions respectively, I diastereoisomer (**5aaa**) (28 mg, 0.08 mmol, 22%, yellow oil), II diastereoisomer (**6aaa**) (50 mg, 0.14 mmol, 14%, white solid). **I diastereoisomer (5aaa)** <sup>1</sup>H-NMR (500 MHz, CDCl<sub>3</sub>)  $\delta$ : 7.56-7.52 (m, 5H, ArH), 7.42-7.26 (m, 10H, ArH), 6.29 (s, 1H, NCHO), 6.14 (q, *J* = 7.3 Hz, 1H, CH<sub>3</sub>CH), 5.97 (s, 1H, CH), 1.47 (d, *J* = 7.3 Hz, 3H, CH<sub>3</sub>); <sup>13</sup>C-NMR (125 MHz, CDCl<sub>3</sub>)  $\delta$ : 163.6, 160.5, 141.0, 137.6, 132.1, 131.3, 129.5, 129.0, 128.7, 128.6, 127.9, 127.6, 127.3, 126.6, 98.7, 84.8, 50.5, 17.9; **HRMS** (ESI<sup>+</sup>): *m/z* calcd for

$C_{24}H_{21}NO_2Na$   $[M+Na]^+$  378.1470, found. 378.1473. **II diastereoisomer (6aaa)**  $^1H$ -NMR (500 MHz,  $CDCl_3$ )  $\delta$ : 7.82-7.75 (m, 1H, ArH),  $\delta$ : 7.59 (d,  $J = 7.2$  Hz, 2H, ArH), 7.50-7.33 (m, 6H, ArH), 7.19-7.09 (m, 6H), 6.50 (s, 1H, NCHO), 5.94 (q,  $J = 7.1$  Hz, 1H,  $CH_3CH$ ), 5.93 (s, 1H, CH), 1.76 (d,  $J = 7.1$  Hz, 3H,  $CH_3$ );  $^{13}C$ -NMR (125 MHz,  $CDCl_3$ )  $\delta$ : 163.7, 160.7, 139.2, 136.6, 132.1, 131.3, 128.9, 128.8, 128.6, 128.4, 128.0, 127.9, 127.3, 126.6, 99.3, 85.1, 52.1, 18.0; **HRMS** (ESI+):  $m/z$  calcd for  $C_{24}H_{21}NO_2Na$   $[M+Na]^+$  378.1470, found. 378.1473.

### 3-Benzoyl-1-(sec-butyl)-4-phenylazetidin-2-one (3aab), (4aab)

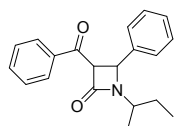

Table 1, Entry 7. Purification with flash chromatography  $R_f$  0.31 (EtOAc:Hex 1:8,  $SiO_2$ ) gave one fraction, mixture of two diastereoisomers (89 mg, 0.32 mmol, 32%, ratio 55:45, yellow oil). Overall  $de = 10$  %.  $^1H$ -NMR (500 MHz,  $CDCl_3$ )  $\delta$ : 8.08-8.06 (m, 2H, ArH), 7.58-7.55 (m, 1H, ArH), 7.49-7.45 (m, 4H, ArH), 7.42-7.33 (m, 3H, ArH), 5.28-5.27 (m, 1H, H-4), 4.74-7.73 (m, 1H, H-3), 3.66-3.60 (m, 0.55H, NCH), 3.46-3.42 (m, 0.45H, NCH), 1.82-1.73 (m, 0.55H,  $CH_2$ ), 1.60-1.49 (m, 0.9H,  $CH_2$ ), 1.39-1.32 (m, 1.9H,  $CH_2+CH_3$ ), 0.99-0.95 (m, 3.3H,  $CH_3$ ), 0.92-0.89 (m, 1.35H,  $CH_3$ );  $^{13}C$ -NMR (125 MHz,  $CDCl_3$ )  $\delta$ : 191.8, 163.4, 163.3, 138.7 (min), 138.4 (maj), 136.3, 134.0, 129.5 (maj), 129.3 (min), 129.2, 129.1 (min), 129.0 (maj), 128.8, 127.3, 127.1, 68.2 (maj), 68.1 (min), 55.5 (min), 54.6 (maj), 52.3 (min), 51.7 (maj), 28.4 (min), 27.8 (maj), 19.3 (maj), 18.0 (min), 11.3 (maj), 11.0 (min); **HRMS** (ESI+):  $m/z$  calcd for  $C_{20}H_{21}NO_2Na$   $[M+Na]^+$  330.1470, found. 330.1466.

### 3-benzoyl-4-(4-chlorophenyl)-1-(1-phenylethyl)azetidin-2-one (3aba), (4aba)

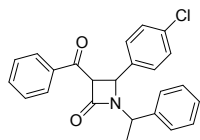

Table 2, Entry 3. Purification with flash chromatography  $R_f$  0.31 (EtOAc:Hex 1:7,  $SiO_2$ ) gave 109 mg, 0.28 mmol, 28% as two fractions respectively, mixture of two diastereoisomers (45 mg, 0.11 mmol, 11%, ratio **3aba** : **4aba**, 63:37, yellow oil) and II diastereoisomer (**4aba**) (64 mg, 0.17 mmol, 17%, yellow oil). Overall  $de = 48$ %. Table 2, Entry 4. Purification with flash chromatography  $R_f$  0.31 (EtOAc:Hex 1:7,  $SiO_2$ ) gave one fraction, mixture of two diastereoisomers (109 mg, 0.28 mmol, 28%, ratio **3aba** : **4aba**, 64:36, yellow oil). Overall  $de = 28$ %. **Mixture of diastereoisomers (3aba), (4aba)**,  $^1H$ -NMR (500 MHz,  $CDCl_3$ )  $\delta$ : 8.07 (d,  $J = 8.3$  Hz 1.26H, ArH), 8.04 (d,  $J = 8.3$  Hz 0.74H, ArH), 7.58 (q,  $J = 6.8$  Hz, 1H, ArH), 7.55-7.44 (m, 3H, ArH), 7.38-7.22 (m, 6H, ArH), 7.17 (d,  $J = 7.8$  Hz, 2H, ArH), 5.09-5.08 (m, 1H, H-4), 4.90 (q,  $J = 7.3$  Hz, 0.37H,  $CH_3CH$ ), 4.70-4.68 (m, 1H, H-3), 4.45 (q,  $J = 7.3$  Hz, 0.63H,  $CH_3CH$ ), 1.78 (d,  $J = 7.3$  Hz, 1.89H,  $CH_3$ ), 1.43 (d,  $J = 7.3$  Hz, 1.11H,  $CH_3$ );  $^{13}C$ -NMR (125 MHz,  $CDCl_3$ )  $\delta$ : 191.3 (maj), 191.1 (min), 163.1 (min), 163.0 (maj), 142.1 (maj), 140.4 (maj), 139.6 (min), 137.0 (min), 136.0 (min), 135.8 (maj), 134.7 (min), 134.6 (maj), 134.1 (min), 129.7 (maj), 129.6 (maj), 129.5 (min), 129.4 (maj), 129.3 (min), 129.3 (maj), 129.0 (min), 128.9 (min), 128.6 (min), 128.5 (maj), 128.2 (min), 128.0 (maj), 127.4 (min), 127.0 (maj), 68.4 (min), 68.3 (maj), 55.3 (min), 55.0 (maj), 54.7 (maj), 53.7 (min), 20.1 (maj), 19.5 (min); **HRMS** (ESI+):  $m/z$  calcd for  $C_{24}H_{20}ClNO_2Na$   $[M+Na]^+$  412.1080, found. 412.1090. **II diastereoisomer (4aba)**  $^1H$ -NMR (500 MHz,  $CDCl_3$ )  $\delta$ : 8.04 (d,  $J = 7.8$  Hz, 2H, ArH), 7.57 (t,  $J = 6.8$  Hz, 1H, ArH), 7.47 (t,  $J = 7.8$  Hz, 2H, ArH), 7.44-7.26 (m, 7H, ArH), 7.22 (d,  $J = 6.8$  Hz, 2H, ArH), 5.08 (d,  $J = 1.9$  Hz, 1H, H-4), 4.90 (q,  $J = 6.8$  Hz, 1H,  $CH_3CH$ ), 4.70 (d,  $J = 1.9$  Hz, 1H, H-3), 1.43 (d,  $J = 6.8$  Hz, 3H,  $CH_3$ );  $^{13}C$ -NMR (125 MHz,  $CDCl_3$ )  $\delta$ : 191.3, 163.1, 139.6, 137.0, 136.0, 134.7, 134.1, 129.5, 129.3, 129.0, 128.9, 128.6, 128.2, 127.4, 68.4, 55.3, 53.7, 19.5; **HRMS** (ESI+):  $m/z$  calcd for  $C_{24}H_{20}ClNO_2Na$   $[M+Na]^+$  412.1080, found. 412.1090

### 2-(4-chlorophenyl)-6-phenyl-3-(1-phenylethyl)-2H-1,3-oxazin-4(3H)-one (5aba), (6aba)

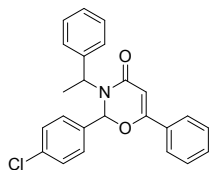

Table 2, Entry 4. Purification with flash chromatography  $R_f$  0.30 (EtOAc:Hex 1:3, SiO<sub>2</sub>) gave one fraction, mixture of two diastereoisomers (109 mg, 0.28 mmol, 28%, white solid). **<sup>1</sup>H-NMR** (500 MHz, CDCl<sub>3</sub>)  $\delta$ : 7.89-7.83 (m, 1H, ArH), 7.61-7.50 (m, 1H, ArH), 7.49-7.40 (m, 1H, ArH), 7.39-7.24 (m, 6H, ArH), 7.23-7.16 (m, 1H, ArH), 7.14-7.07 (m, 4H, ArH), 6.46 (s, 0.56H, NCHO), 6.23 (s, 0.44H, NCHO), 6.12 (q,  $J = 7.1$  Hz, 0.44H, CH<sub>3</sub>CH), 6.00 (q,  $J = 7.1$  Hz, 0.56H, CH<sub>3</sub>CH), 5.97 (s, 0.44H, CH), 5.93 (s, 0.56H, CH), 1.75 (d,  $J = 7.1$  Hz, 1.32H, CH<sub>3</sub>), 1.50 (d,  $J = 7.1$  Hz, 1.68H, CH<sub>3</sub>); **<sup>13</sup>C-NMR** (125 MHz, CDCl<sub>3</sub>)  $\delta$ : 163.4 (maj), 163.3 (min), 160.6 (min), 160.4 (maj), 140.7 (maj), 138.9 (min), 136.2 (maj), 135.6 (min), 135.4 (min), 135.3 (maj), 131.9 (min), 131.5 (maj), 131.4 (min), 129.1 (maj), 129.0 (min), 128.9 (min), 128.8 (maj), 128.8 (maj), 128.7 (min), 128.5 (maj), 128.4 (min), 128.3 (min), 128.2 (maj), 128.0 (min), 127.3 (maj), 127.1 (min), 126.5 (maj), 126.4 (min), 99.3 (min), 98.6 (maj), 84.2, 52.0 (min), 50.8 (maj), 18.0 (min), 17.9 (maj); **HRMS** (ESI<sup>+</sup>):  $m/z$  calcd for C<sub>24</sub>H<sub>20</sub>ClNO<sub>2</sub>Na [M+Na]<sup>+</sup> 412.1080, found. 412.1085.

### 3-Benzoyl-1-(1-(naphthalen-1-yl)ethyl)-4-phenylazetidin-2-one (3aac), (4aac)

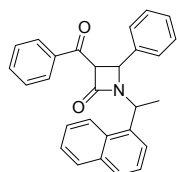

Table 2, Entry 6. Purification with flash chromatography  $R_f$  0.30 (EtOAc:Hex 1:6, SiO<sub>2</sub>) gave one fraction, mixture of two diastereoisomers (105 mg, 0.26 mmol, 26%, ratio **3aac** : **4aac**, 63:37, yellow oil). Overall  $de = 26\%$ . Table 2, Entry 5. Purification with flash chromatography  $R_f$  0.30 (EtOAc:Hex 1:6, SiO<sub>2</sub>) gave one fraction, mixture of two diastereoisomers (97 mg, 0.24 mmol, 24%, ratio **3aac** : **4aac**, 58:42, yellow oil). Overall  $de = 16\%$ . **<sup>1</sup>H-NMR** (500 MHz, CDCl<sub>3</sub>)  $\delta$ : 8.09-8.07 (m, 1H, ArH), 8.04-8.03 (m, 0.65H, ArH), 8.00-7.99 (m, 1.35H, ArH), 7.90-7.89 (m, 0.65H, ArH), 7.83-7.82 (m, 1H, ArH), 7.69-7.67 (m, 0.35H, ArH), 7.60-7.23 (m, 10.35H, ArH), 7.16-7.13 (m, 0.35H, ArH), 7.08 (t,  $J = 7.3$  Hz, 0.65H, ArH), 7.03 (d,  $J = 6.8$  Hz, 0.65H, ArH), 5.82 (q,  $J = 7.3$  Hz, 0.65H, CH<sub>3</sub>CH), 5.44 (q,  $J = 7.3$  Hz, 0.35H, CH<sub>3</sub>CH), 5.17 (d,  $J = 1.9$  Hz, 0.35H, H-4), 4.77 (d,  $J = 2.4$  Hz, 0.65H, H-4), 4.76 (d,  $J = 2.4$  Hz, 0.35H, H-3), 4.68 (d,  $J = 1.9$  Hz, 0.65H, H-3), 1.95 (d,  $J = 7.3$  Hz, 1.05H, CH<sub>3</sub>), 1.58 (d,  $J = 6.8$  Hz, 1.95H, CH<sub>3</sub>); **<sup>13</sup>C-NMR** (125 MHz, CDCl<sub>3</sub>)  $\delta$ : 191.7 (min), 191.1 (maj), 163.6 (min), 163.4 (maj), 138.3 (maj), 136.8 (min), 136.3 (min), 136.2 (maj), 135.2, 134.0 (maj), 133.9 (min), 131.3 (maj), 130.9 (min), 129.5 (min), 129.3 (maj), 129.2 (min), 129.1 (maj), 129.0 (min), 129.0 (maj), 128.9 (min), 128.8 (maj), 128.7 (maj), 128.6 (min), 128.6, 127.5 (maj), 127.2 (min), 126.9 (maj), 126.7 (min), 126.2 (maj), 125.9 (min), 125.5 (min), 125.1 (maj), 124.6 (maj), 124.3 (min), 123.0, 122.9, 68.3 (min), 67.8 (maj), 56.0 (maj), 55.3 (min), 49.9 (min), 48.5 (maj), 19.4 (min), 19.3 (maj); **HRMS** (ESI<sup>+</sup>):  $m/z$  calcd for C<sub>28</sub>H<sub>23</sub>NO<sub>2</sub>Na [M+Na]<sup>+</sup> 428.1626, found. 428.1638.

### 3-Benzoyl-1-(1-(naphthalen-2-yl)ethyl)-4-phenylazetidin-2-one (3aad), (4aad)

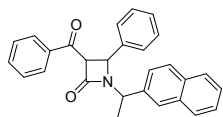

Table 2, Entry 7. Purification with flash chromatography  $R_f$  0.30 (EtOAc:Hex 1:6, SiO<sub>2</sub>) gave one fraction, mixture of two diastereoisomers (73 mg, 0.18 mmol, 18%, ratio **3aad** : **4aad**, 68:32, yellow oil). overall  $de = 36\%$ . Table 2, Entry 8. Purification with flash chromatography  $R_f$  0.30 (EtOAc:Hex 1:6, SiO<sub>2</sub>) gave (102 mg, 0.25 mmol, 25%) as three fractions respectively, I diastereoisomer **3aad** (28 mg, 0.07 mmol, 7%, yellow oil), mixture of two diastereoisomers (46 mg, 0.11 mmol, 11%, ratio **3aad** : **4aad**, 42:58, yellow oil) and II diastereoisomer **4aad** (28 mg, 0.07 mmol, 7%, yellow oil). Overall  $de = 6\%$ . **I diastereoisomer (3aad)** **<sup>1</sup>H-NMR** (500 MHz, CDCl<sub>3</sub>)  $\delta$ : 8.04 (d,  $J = 7.4$  Hz, 2H, ArH), 7.84-7.82 (m, 2H, ArH), 7.78-7.76 (m, 1H, ArH), 7.63 (s, 1H, ArH), 7.56 (t,  $J = 7.7$  Hz, 1H, ArH), 7.49-7.42 (m, 4H, ArH), 7.36-7.32 (m, 5H,

ArH), 7.28-7.26 (m, 1H, ArH), 5.12 (q, J = 7.2 Hz, 1H, CH<sub>3</sub>CH), 5.11 (d, J = 2.0 Hz, 1H, H-4), 4.78 (d, J = 2.0 Hz, 1H, H-3), 1.51 (d, J = 7.2 Hz, 3H, CH<sub>3</sub>); **II diastereoisomer (4aad)** <sup>1</sup>H-NMR (500 MHz, CDCl<sub>3</sub>) δ: 8.08 (d, J = 7.4 Hz 2H, ArH), 7.82-7.78 (m, 2H, ArH), 7.75-7.73 (m, 1H, ArH), 7.60-7.50 (m, 2H, ArH), 7.48-7.45 (m, 4H, ArH), 7.41-7.38 (m, 1H, ArH), 7.33-7.26 (m, 5H, ArH), 5.11 (d, J = 2.2 Hz, 1H, H-4), 4.77 (d, J = 2.2 Hz, 1H, H-3), 4.58 (q, J = 7.1 Hz, 1H, CH<sub>3</sub>CH), 1.91 (d, J = 7.1 Hz, 3H, CH<sub>3</sub>); **Mixture of diastereoisomers (3aad), (4aad)** <sup>1</sup>H-NMR (500 MHz, CDCl<sub>3</sub>) δ: 8.08 (d, J = 7.4 Hz 0.84H, ArH), 8.04 (d, J = 7.4 Hz 1.16H, ArH), 7.85-7.82 (m, 1.16H, ArH), 7.82-7.78 (m, 0.84H, ArH), 7.78-7.76 (m, 0.58H, ArH), 7.76-7.73 (m, 0.42H, ArH), 7.64 (s, 0.58H, ArH), 7.60-7.54 (m, 1.42H, ArH), 7.49-7.42 (m, 4H, ArH), 7.41-7.33 (m, 3.32H, ArH), 7.33-7.26 (m, 2.68H, ArH), 5.14-5.10 (m, 1.58H, CH<sub>3</sub>CH+H<sub>4</sub>), 4.79-4.78 (m, 1H, H-3), 4.58 (q, J = 6.9 Hz, 0.42H, CH<sub>3</sub>CH), 1.91 (d, J = 6.9 Hz, 1.26H, CH<sub>3</sub>), 1.51 (d, J = 6.9 Hz, 1.74H, CH<sub>3</sub>); <sup>13</sup>C-NMR (125 MHz, CDCl<sub>3</sub>) δ: 191.7 (min), 191.4 (maj), 163.5, 163.4 (maj), 138.4 (maj), 138.2 (min), 137.3 (min), 137.2 (maj), 136.2 (min), 136.1 (maj), 134.0, 133.4, 133.1, 129.5 (min), 129.4 (maj), 129.2 (min), 129.1 (maj), 129.0, 128.9 (min), 128.9 (maj), 128.8, 128.3 (maj), 128.2 (min), 127.9 (maj), 127.8 (min), 127.3 (maj), 127.2 (min), 126.4 (maj), 126.3 (min), 126.2 (min), 126.1 (maj), 125.9 (min), 125.7 (maj), 125.0, 68.3 (maj), 68.2 (min), 56.0 (maj), 55.5 (min), 55.3 (min), 53.6 (maj), 20.3 (min), 19.4 (maj); **HRMS** (ESI+): m/z calcd for C<sub>28</sub>H<sub>23</sub>NO<sub>2</sub>Na [M+Na]<sup>+</sup> 428.1626, found. 428.1630.

### 3-((Naphthalen-1-yl)acetyl)-4-phenyl-1-(1-phenylethyl)azetid-2-one (3baa), (4baa)

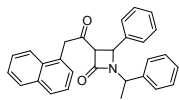

Table 2, Entry 9. Purification with flash chromatography R<sub>f</sub> 0.30 (EtOAc:Hex 1:3, SiO<sub>2</sub>) gave one fraction, mixture of two diastereoisomers (176 mg, 0.42 mmol, 42%, ratio **3baa** : **4baa**, 52:48, yellow oil). Overall *de* = 4%. Table 2, Entry 10. Purification with flash chromatography R<sub>f</sub> 0.30 (EtOAc:Hex 1:3, SiO<sub>2</sub>) gave one fraction, mixture of two diastereoisomers (185 mg, 0.44 mmol, 44%, ratio **3baa** : **4baa** 67:33, yellow oil). Overall *de* = 34%. Table 2, Entry 11. Purification with flash chromatography R<sub>f</sub> 0.30 (EtOAc:Hex 1:3, SiO<sub>2</sub>) gave one fraction, mixture of two diastereoisomers (147 mg, 0.35 mmol, 35%, ratio **3baa** : **4baa**, 67:33, yellow oil). Overall *de* = 34%. <sup>1</sup>H-NMR (500 MHz, CDCl<sub>3</sub>) δ: 7.93-7.83 (m, 2.33H, ArH), 7.78-7.75 (m, 1H, ArH), 7.56-7.46 (m, 2.67H, ArH), 7.45-7.38 (m, 1.67H, ArH), 7.34-7.22 (m, 6.66H, ArH), 7.17-7.14 (m, 2H, ArH), 7.06-7.04 (m, 0.67H, ArH), 4.94 (q, J = 7.3 Hz, 0.67H, CH<sub>3</sub>CH), 4.79 (d, J = 2.0 Hz, 0.67H, H-4), 4.78 (d, J = 2.0 Hz, 0.33H, H-4), 4.48 (d, J = 16.1 Hz, 0.33H, CH<sub>2</sub>), 4.33 (d, J = 16.1 Hz, 0.67H, CH<sub>2</sub>), 4.36 (q, J = 7.3 Hz, 0.33H, CH<sub>3</sub>CH), 4.28 (d, J = 16.1 Hz, 0.33H, CH<sub>2</sub>), 4.25 (d, J = 16.1 Hz, 0.67H, CH<sub>2</sub>), 4.19 (d, J = 2.0 Hz, 0.67H, H-3), 4.17 (d, J = 2.0 Hz, 0.33H, H-3), 1.80 (d, J = 7.3 Hz, 0.99H, CH<sub>3</sub>), 1.37 (d, J = 7.3 Hz, 2.01H, CH<sub>3</sub>); <sup>13</sup>C-NMR (125 MHz, CDCl<sub>3</sub>) δ: 199.8 (maj), 199.5 (min), 163.6, 140.8 (maj), 139.7 (min), 137.9 (min), 136.7 (maj) 134.1, 132.5 (maj), 132.4 (min), 129.9, 129.1, 129.0 (min), 128.9 (maj), 128.9 (maj), 128.8 (min), 128.5, 128.1 (min), 127.9 (maj), 127.4, 127.2, 127.1, 126.9, 126.8 (maj), 126.8 (min), 126.1 (maj), 126.1 (min), 125.8 (maj), 125.8 (min), 124.2, 69.5 (min), 69.4 (maj), 55.9 (min), 55.5 (maj), 55.1 (maj), 53.5 (min), 48.1 (maj), 48.0 (min), 20.4 (maj), 19.4 (min); **HRMS** (ESI+): m/z calcd for C<sub>29</sub>H<sub>25</sub>NO<sub>2</sub>Na [M+Na]<sup>+</sup> 442.1783, found. 442.1786.

### 4-(4-Chlorophenyl)-3-((naphthalen-1-yl)acetyl)-1-(1-phenylethyl)azetid-2-one (3bba), (4bba)

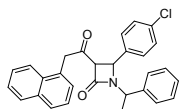

Table 2, Entry 12. Purification with flash chromatography R<sub>f</sub> 0.32 (EtOAc:Hex 1:3, SiO<sub>2</sub>) gave one fraction, mixture of two diastereoisomers (222 mg, 0.49 mmol, 49%, ratio **3bba** : **4bba**, 66:34, yellow oil). Overall *de* = 32%. <sup>1</sup>H-NMR (500 MHz, CDCl<sub>3</sub>) δ: 7.90-7.89 (m, 0.33H, ArH), 7.86-7.82 (m, 1.66H, ArH), 7.77-7.74 (m, 1H, ArH), 7.53-7.32 (m, 4H, ArH), 7.32-7.23 (m, 3H, ArH), 7.20-7.20 (m, 4H, ArH), 7.00 (d, J = 8.3 Hz, 1.33H, ArH), 6.90 (d, J = 8.3 Hz, 0.66H, ArH), 4.89 (q, J = 6.8 Hz, 0.66H, CH<sub>3</sub>CH), 4.70 (d, J = 2.4 Hz, 0.33H, H-4), 4.68 (d, J = 2.4 Hz, 0.66H, H-4), 4.46-4.36 (m, 1.33H, CH<sub>3</sub>CH + CH<sub>2</sub>), 4.27-4.20 (m, 1H, CH<sub>2</sub>), 4.09 (d, J = 2.4 Hz, 0.66H, H-3), 4.08 (d, J = 2.4 Hz, 0.33H, H-3), 1.75 (d, J = 7.3 Hz, 1H, CH<sub>3</sub>), 1.37 (d, J = 6.8 Hz, 2H, CH<sub>3</sub>); <sup>13</sup>C-NMR (125 MHz, CDCl<sub>3</sub>) δ: 199.7 (min), 199.4 (maj), 163.4 (maj),

163.3 (min), 140.4 (min), 139.4 (maj), 136.4 (maj), 135.3 (min) 134.7 (maj), 134.6 (min), 134.1, 132.4, 129.7 (min), 129.2 (maj), 129.2 (min), 128.9 (maj), 128.8, 128.7, 128.5 (min), 128.4 (maj), 128.3, 128.2 (maj), 128.0 (min), 127.5, 127.3 (maj), 127.0 (min), 126.9 (min), 126.8 (maj), 126.1, 125.8 (min), 125.8 (maj), 124.1, 69.3, 55.3 (maj), 54.9 (min), 54.8 (min), 53.6 (maj), 48.2 (min), 48.1 (maj), 20.1 (min), 19.4 (maj); **HRMS** (ESI+):  $m/z$  calcd for  $C_{29}H_{24}ClNO_2Na$   $[M+Na]^+$  476.1393, found. 476.1396.

### 3-((Naphthalen-1-yl)acetyl)-1-(1-(naphthalen-1-yl)ethyl)-4-phenylazetidin-2-one (3bac), (4bac)

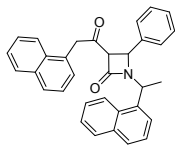

Table 2, Entry 13. Purification with flash chromatography  $R_f$  0.29 (EtOAc:Hex 1:3,  $SiO_2$ ) gave one fraction, mixture of two diastereoisomers (174 mg, 0.37 mmol, 37%, ratio **3bac** : **4bac**, 61:39). Overall  $de$  = 22%.  **$^1H$ -NMR** (500 MHz,  $CDCl_3$ )  $\delta$ : 8.09 (d,  $J$  = 8.3 Hz, 0.61H, ArH), 8.04 (d,  $J$  = 8.3 Hz, 0.39H, ArH), 7.94-7.73 (m, 4.61H, ArH), 7.67 (d,  $J$  = 8.3 Hz, 0.39H, ArH), 7.57-7.33 (m, 7H, ArH), 7.29-7.20 (m, 3H, ArH), 7.10 (t,  $J$  = 7.3 Hz, 0.39H, ArH), 7.00 (d,  $J$  = 7.8 Hz, 2H, ArH), 6.81 (d,  $J$  = 7.3 Hz, 0.61H, ArH), 5.84 (q,  $J$  = 7.3 Hz, 0.61H,  $CH_3CH$ ), 5.37 (q,  $J$  = 6.8 Hz, 0.39H,  $CH_3CH$ ), 4.83 (d,  $J$  = 2.0 Hz, 0.39H, H-4), 4.51 (d,  $J$  = 16.1 Hz, 0.39H,  $CH_2$ ), 4.37 (d,  $J$  = 16.1 Hz, 0.61H,  $CH_2$ ), 4.33 (d,  $J$  = 2.0 Hz, 0.61H, H-4), 4.28 (d,  $J$  = 16.1 Hz, 0.39H,  $CH_2$ ), 4.21 (d,  $J$  = 16.1 Hz, 0.61H,  $CH_2$ ), 4.20 (d,  $J$  = 2.0 Hz, 0.39H, H-3), 4.19 (d,  $J$  = 2.0 Hz, 0.61H, H-3), 1.93 (d,  $J$  = 6.8 Hz, 1.17H,  $CH_3$ ), 1.52 (d,  $J$  = 6.8 Hz, 1.83H,  $CH_3$ );  **$^{13}C$ -NMR** (125 MHz,  $CDCl_3$ )  $\delta$ : 199.8 (min), 199.0 (maj), 163.8 (min), 163.6 (maj), 137.8 (maj), 136.2 (min), 135.2 (min), 134.1 (maj), 134.1, 134.0, 133.9, 132.5 (min), 132.4 (maj), 131.2 (maj), 130.9 (min), 129.8, 129.2, 129.1 (min), 129.0 (maj), 128.9, 128.8 (maj), 128.7 (min), 128.6 (maj), 128.6 (min), 128.5 (min), 128.4 (maj), 127.3 (maj), 127.2 (min), 126.9 (min), 126.8 (maj), 126.7 (maj), 126.6 (min), 126.3 (maj), 126.1 (min), 126.0 (maj), 125.9 (min), 125.8 (min), 125.7 (maj), 125.5 (min), 125.1 (maj), 124.5, 124.2 (min), 124.1 (maj), 122.9 (maj), 122.8 (min), 69.5 (min), 69.0 (maj), 55.9 (maj), 55.3 (min), 48.4, 48.2 (min), 47.7 (maj), 19.4 (min), 19.2 (maj); **HRMS** (ESI+):  $m/z$  calcd for  $C_{33}H_{27}NO_2Na$   $[M+Na]^+$  492.1939, found. 492.1938.

### 3-((Naphthalen-1-yl)acetyl)-1-(1-(naphthalen-2-yl)ethyl)-4-phenylazetidin-2-one (3bad), (4bad)

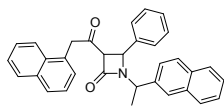

Table 2, Entry 14. Purification with flash chromatography  $R_f$  0.29 (EtOAc:Hex 1:3,  $SiO_2$ ) gave one fraction, mixture of two diastereoisomers (206 mg, 0.48 mmol, 48%, ratio **3bad** : **4bad**, 62:38, yellow oil). Overall  $de$  = 24%.  **$^1H$ -NMR** (500 MHz,  $CDCl_3$ )  $\delta$ : 7.93-7.00 (m, 6H, ArH), 7.59 (s, 0.62H, ArH), 7.52-7.42 (m, 4.38H, ArH), 7.42-7.34 (m, 2.62H, ArH), 7.28-7.13 (m, 3.38H, ArH), 7.11 (d,  $J$  = 1.5 Hz, 1.38H, ArH), 7.04-7.02 (m, 0.62H, ArH), 5.10 (q,  $J$  = 7.3 Hz, 0.62H,  $CH_3CH$ ), 4.79-4.77 (m, 1H, H-4), 4.51 (q,  $J$  = 7.3 Hz, 0.38H,  $CH_3CH$ ), 4.38 (d,  $J$  = 16.1 Hz, 0.38H,  $CH_2$ ), 4.42 (d,  $J$  = 16.1 Hz, 0.62H,  $CH_2$ ), 4.28 (d,  $J$  = 16.1 Hz, 0.38H,  $CH_2$ ), 4.25 (d,  $J$  = 16.1 Hz, 0.62H,  $CH_2$ ), 4.20 (d,  $J$  = 1.9 Hz, 0.62H, H-3), 4.18 (d,  $J$  = 1.9 Hz, 0.38H, H-3), 1.87 (d,  $J$  = 7.3 Hz, 1.14H,  $CH_3$ ), 1.45 (d,  $J$  = 7.3 Hz, 1.86H,  $CH_3$ );  **$^{13}C$ -NMR** (125 MHz,  $CDCl_3$ )  $\delta$ : 199.8 (min), 199.6 (maj), 163.7 (maj), 163.6 (min), 138.2 (min), 137.9 (maj), 137.2 (maj), 136.7 (min), 134.1 (min), 134.0 (maj), 133.4, 133.2 (maj), 133.1 (min), 132.5 (min), 132.4 (maj), 129.9 (min), 129.8 (maj), 129.1 (min), 129.0 (maj), 128.9 (min), 128.9 (maj), 128.5, 128.3 (maj), 128.2 (min), 127.9 (maj), 127.8 (min), 127.3 (maj), 127.1 (min), 126.8 (min), 126.8 (maj), 126.5 (maj), 126.5 (min), 126.4, 126.3, 126.2 (min), 126.1 (maj), 126.0, 125.9 (maj), 125.8 (min), 125.7, 125.6, 124.9, 124.2, 69.5 (maj), 69.4 (min), 56.0 (maj), 55.6 (min), 55.3 (min), 53.5 (maj), 48.2 (min), 48.0 (maj), 20.4 (min), 19.4 (maj); **HRMS** (ESI+):  $m/z$  calcd for  $C_{33}H_{27}NO_2Na$   $[M+Na]^+$  492.1939, found. 492.1942.

<sup>1</sup>H and <sup>13</sup>C-NMR Spectra

**3aaa**

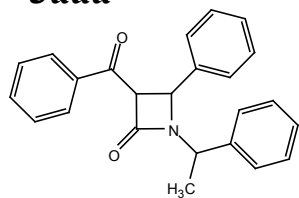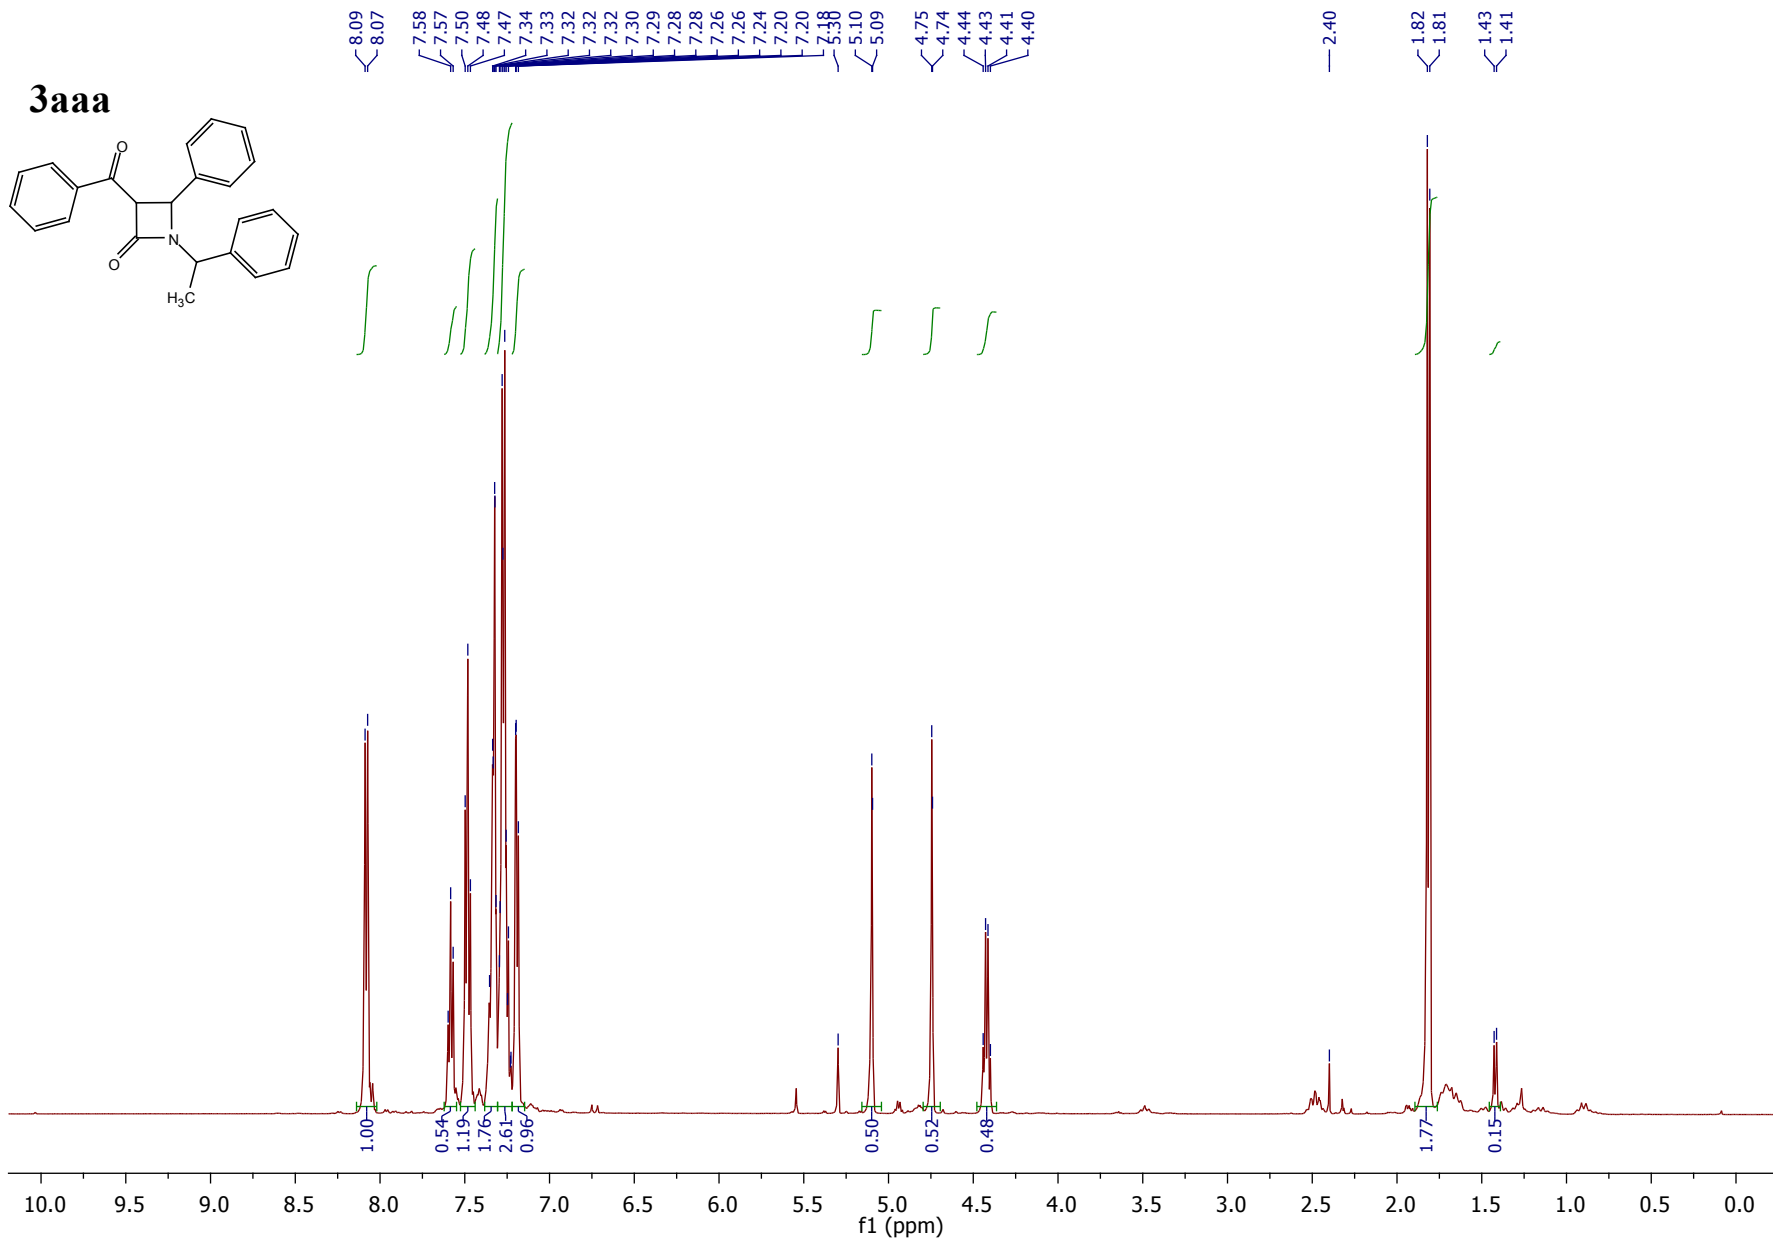



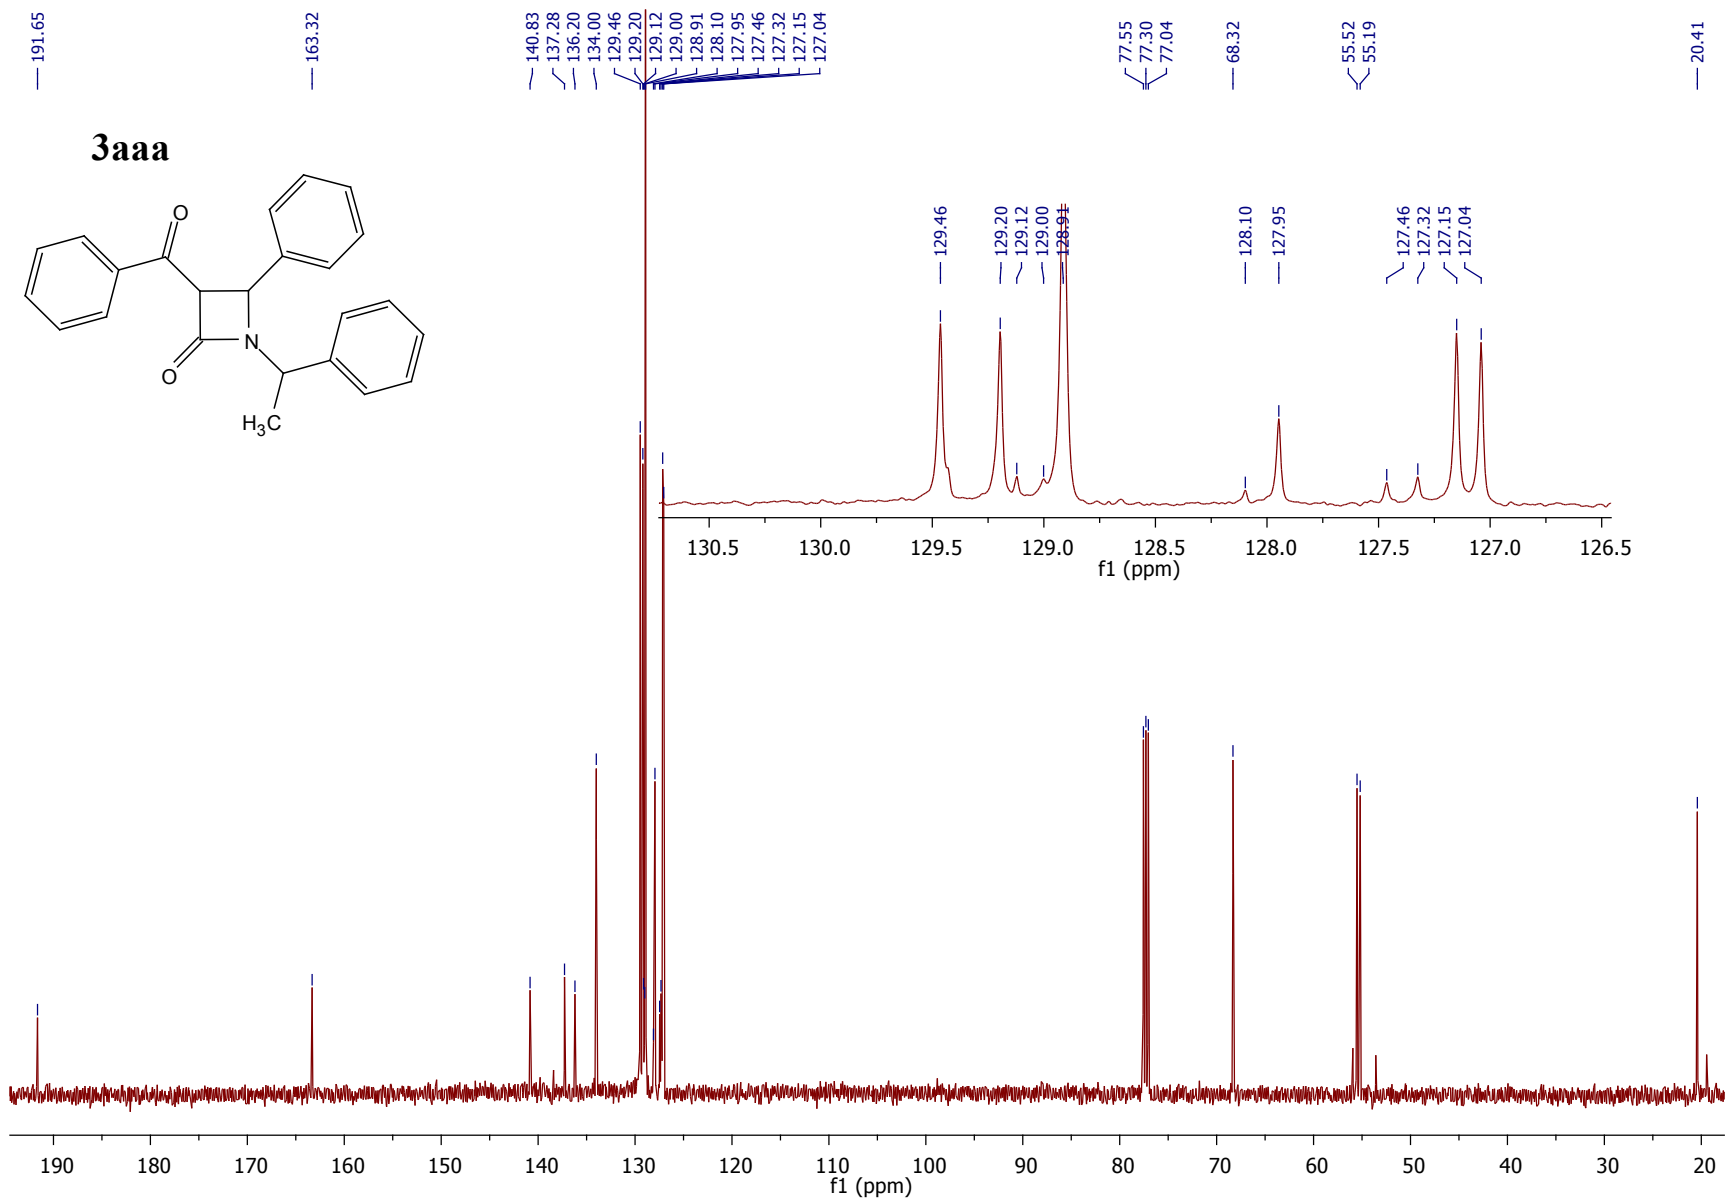

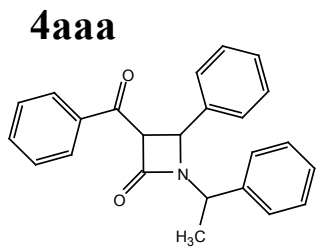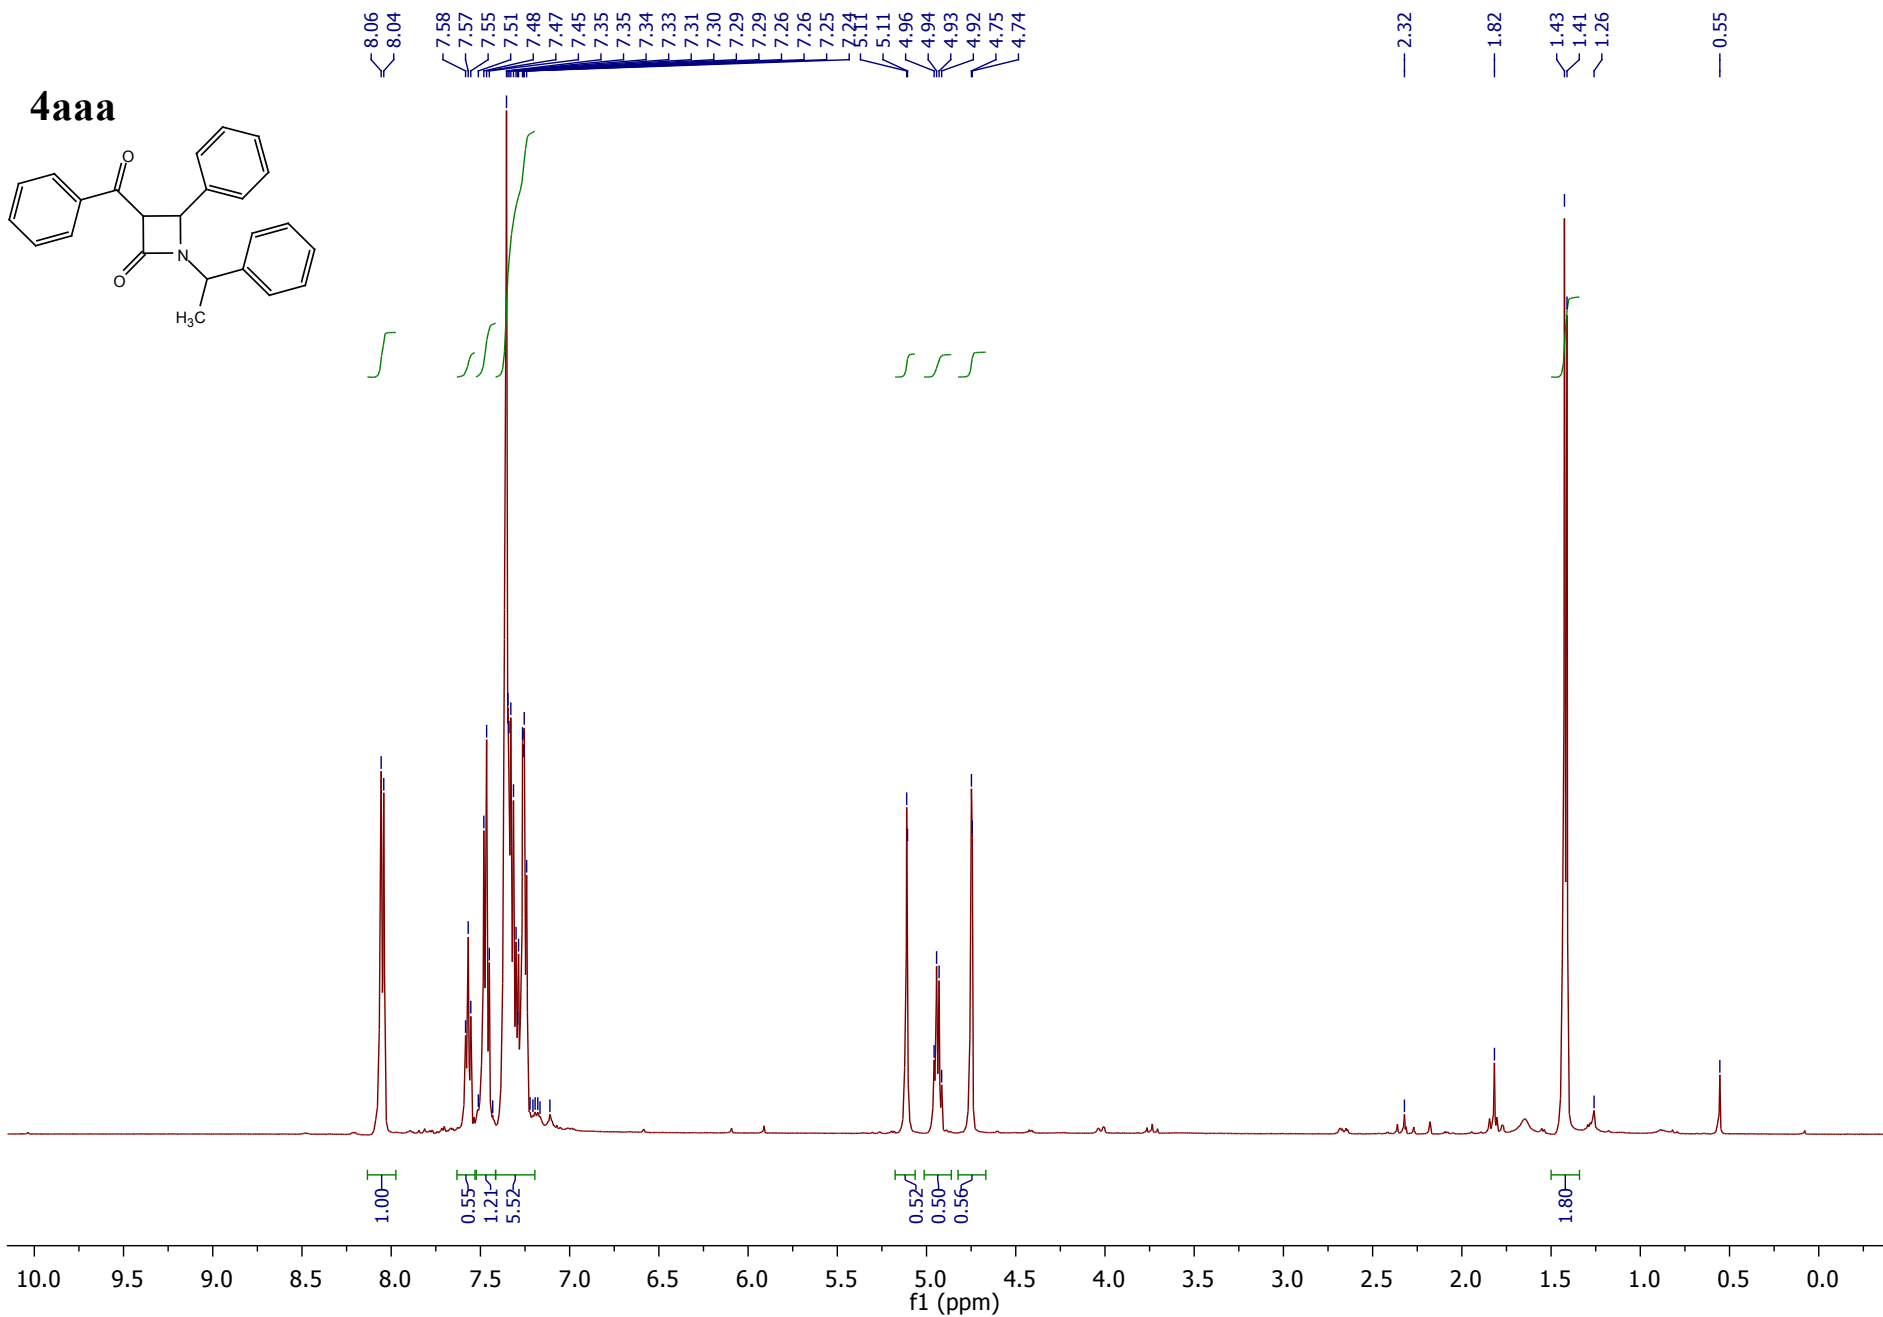

S10

— 191.40

— 163.32

— 139.80  
— 138.41  
— 136.17  
— 133.97  
— 129.43  
— 129.19  
— 129.12  
— 129.01  
— 128.96  
— 128.90  
— 128.10  
— 127.46  
— 127.32

— 77.58  
— 77.33  
— 77.07

— 68.33

— 55.95  
— 53.58

— 19.45

**4aaa**

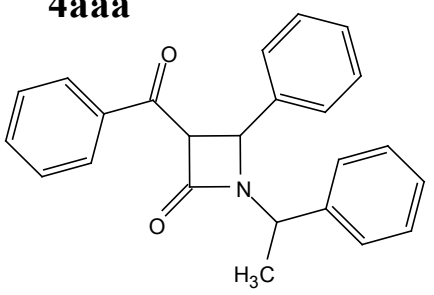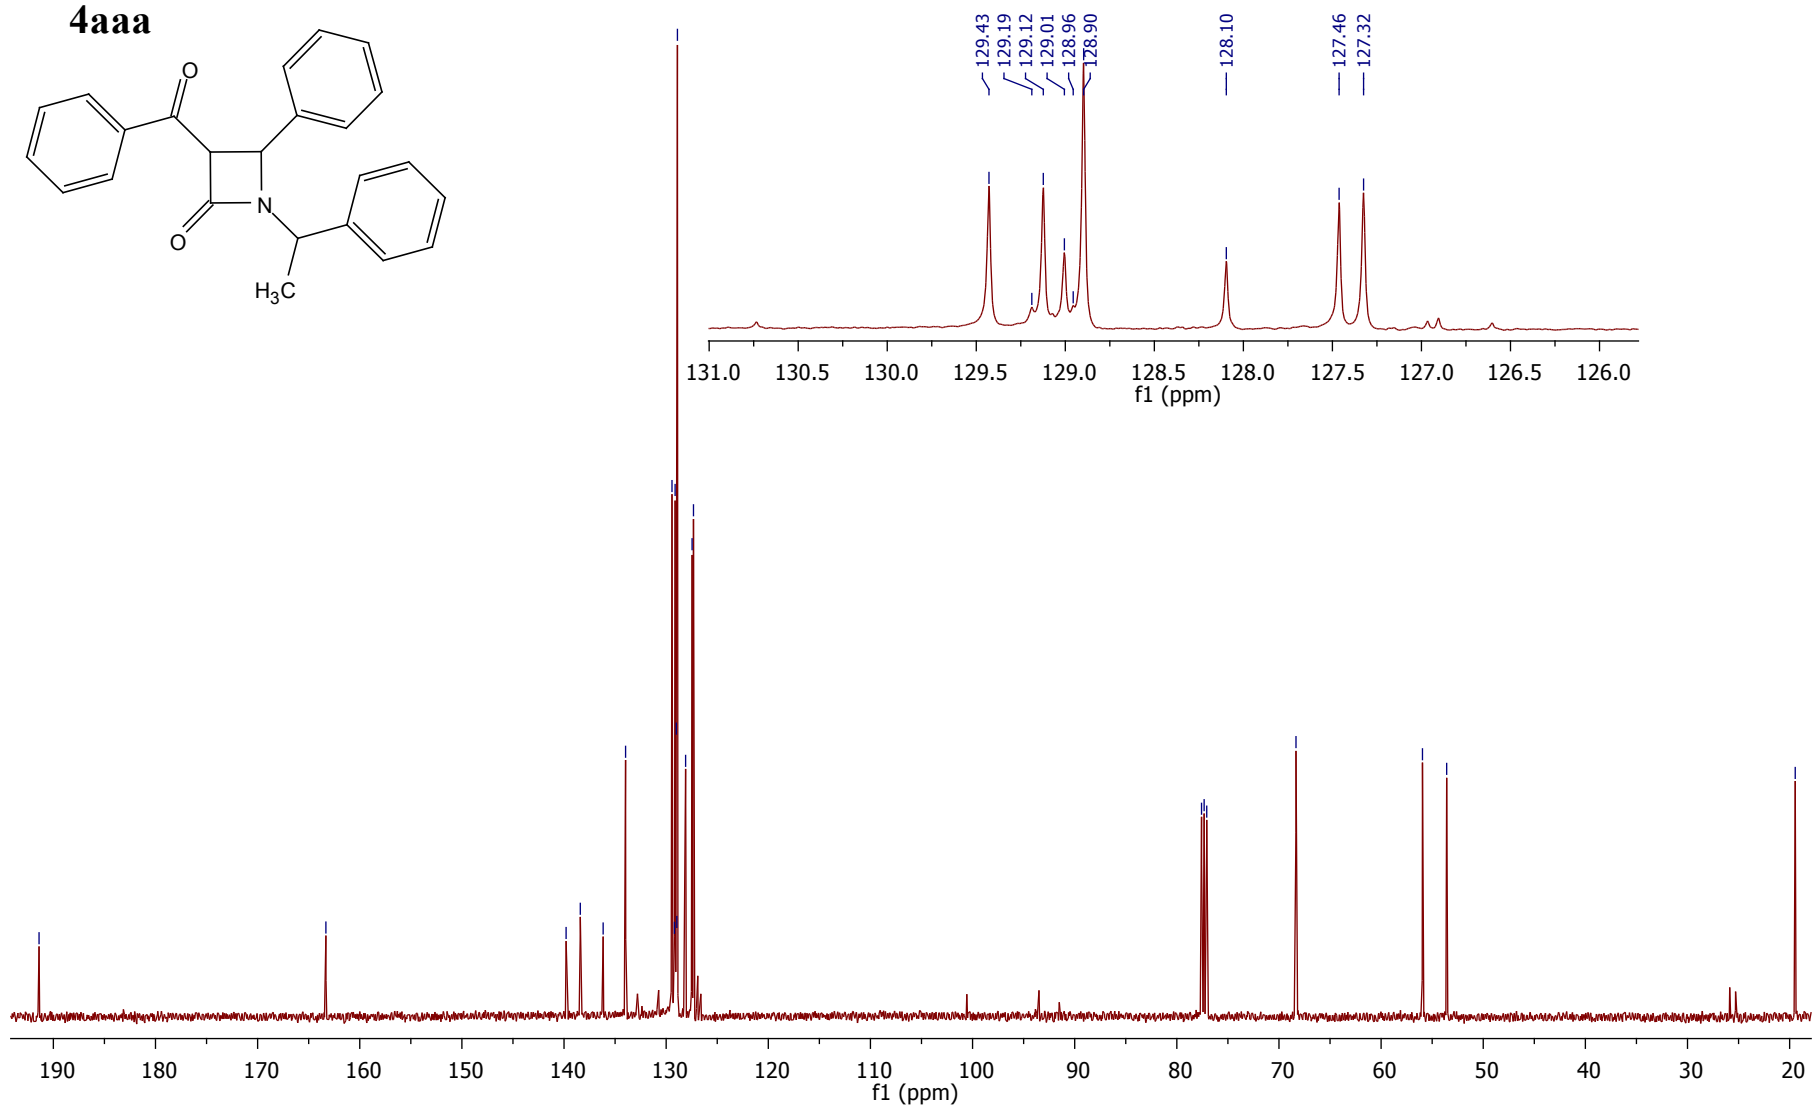

5aaa

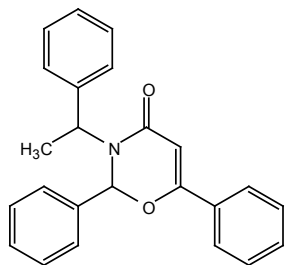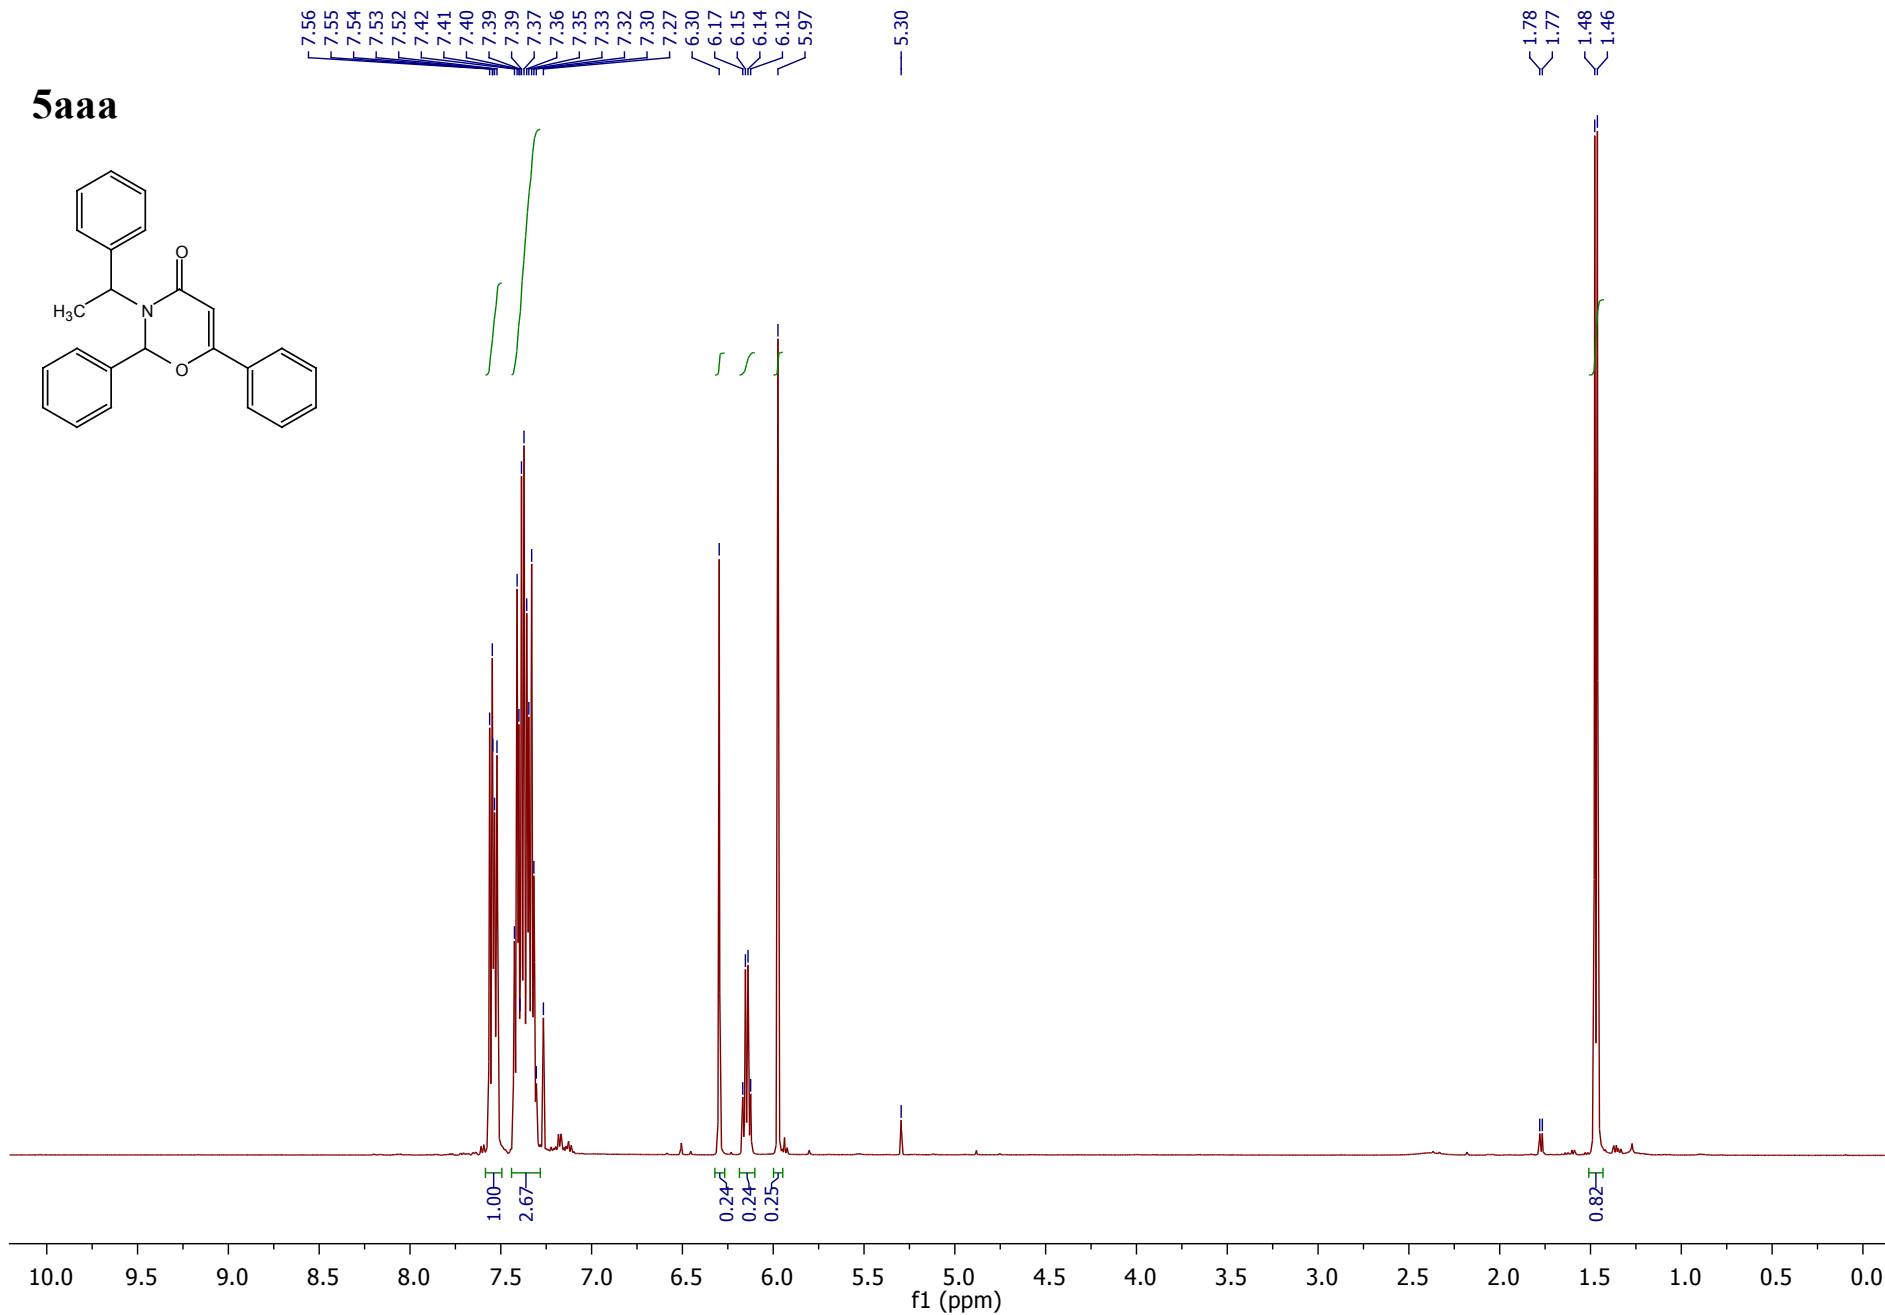

# 5aaa

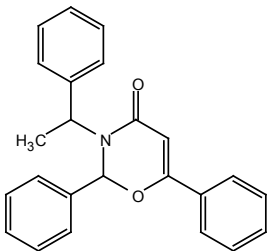

— 163.62  
— 160.51

— 141.03  
— 137.64  
— 132.16  
— 131.33  
— 129.50  
— 128.99  
— 128.74  
— 128.59  
— 127.95  
— 127.59  
— 127.32  
— 126.62

— 98.69

— 84.81

— 77.55  
— 77.30  
— 77.04

— 50.53

— 17.88

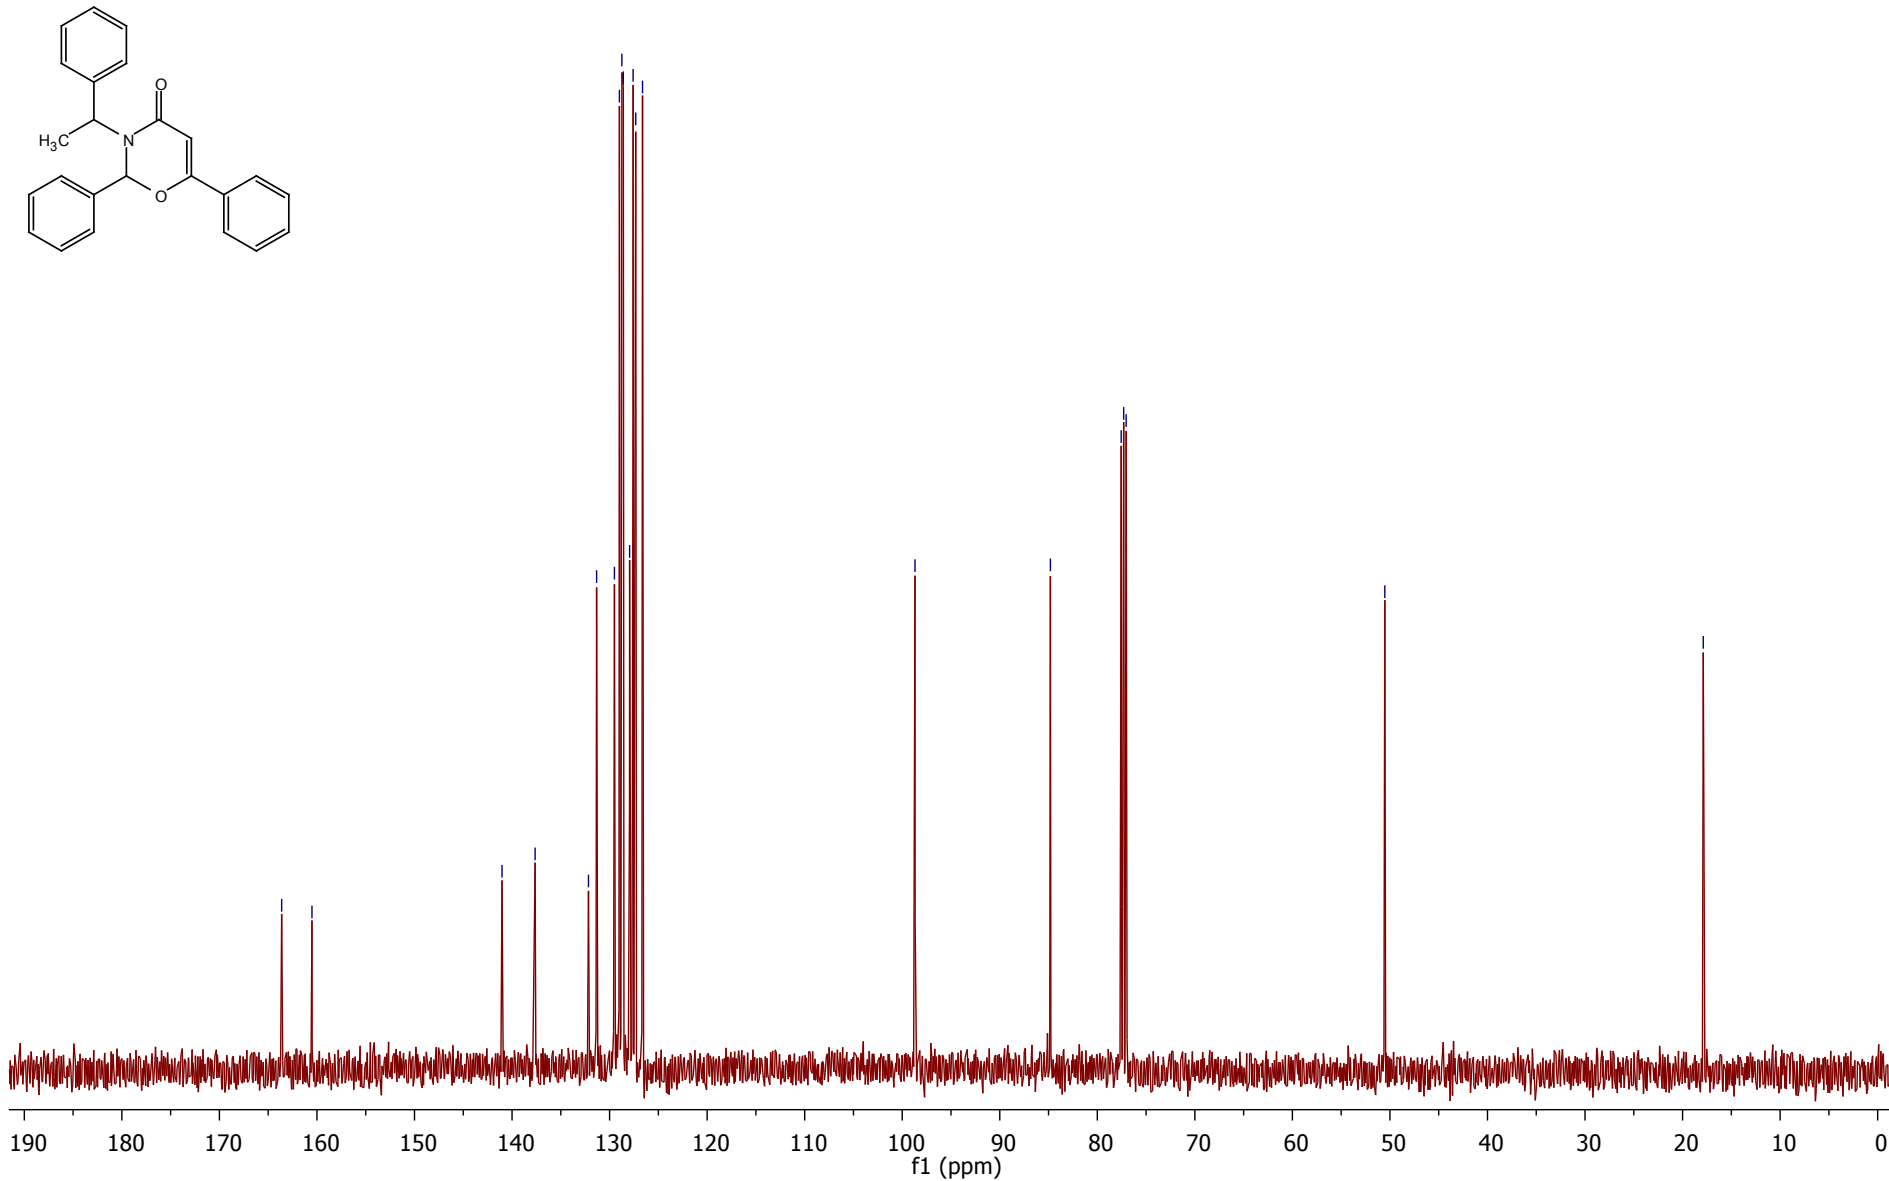

S13

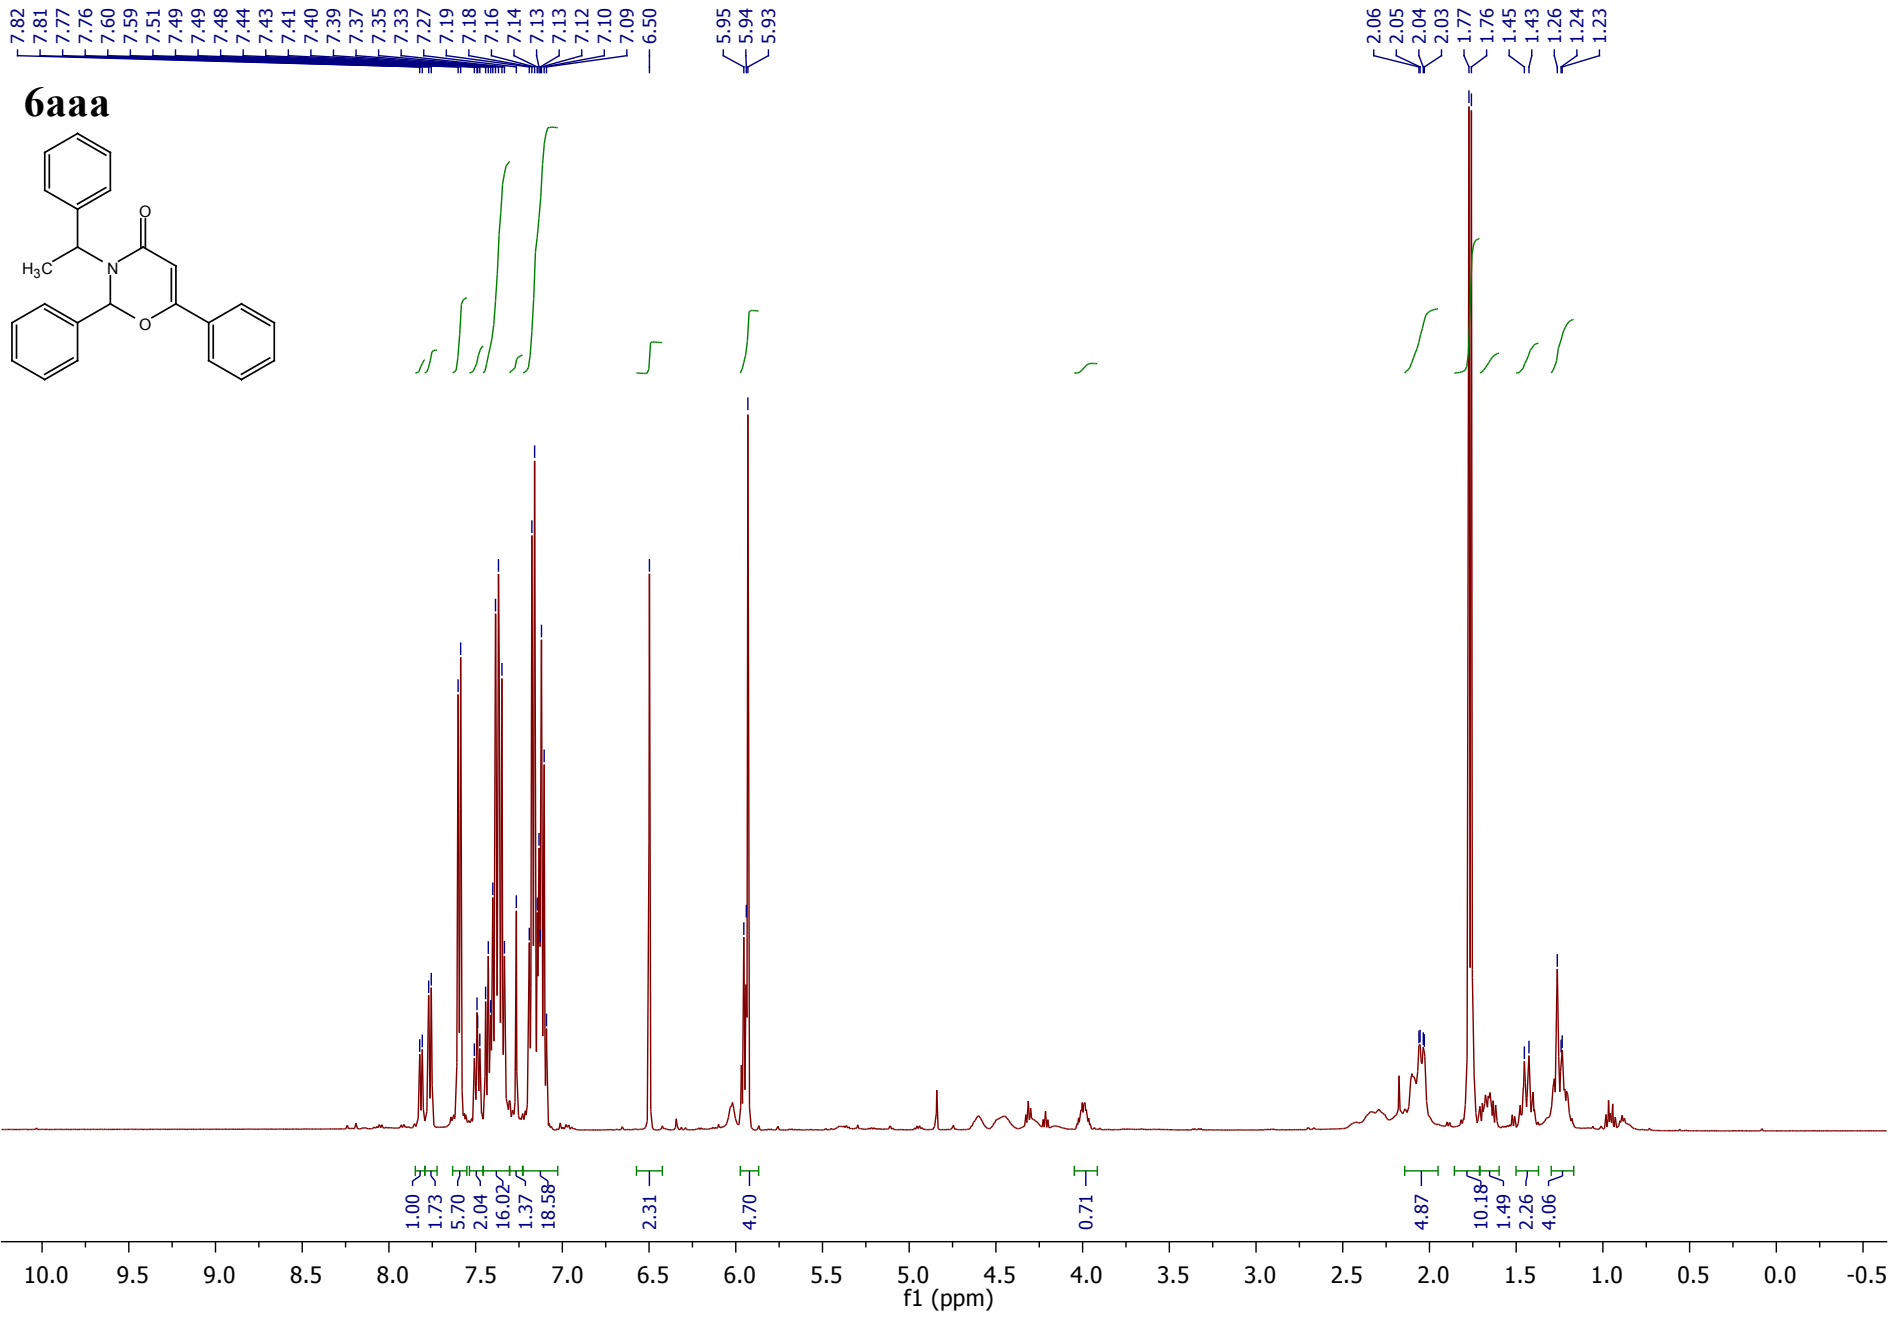

**6aaa**

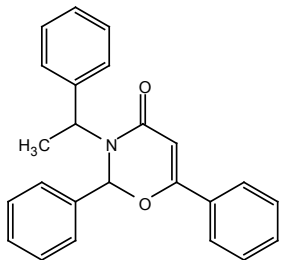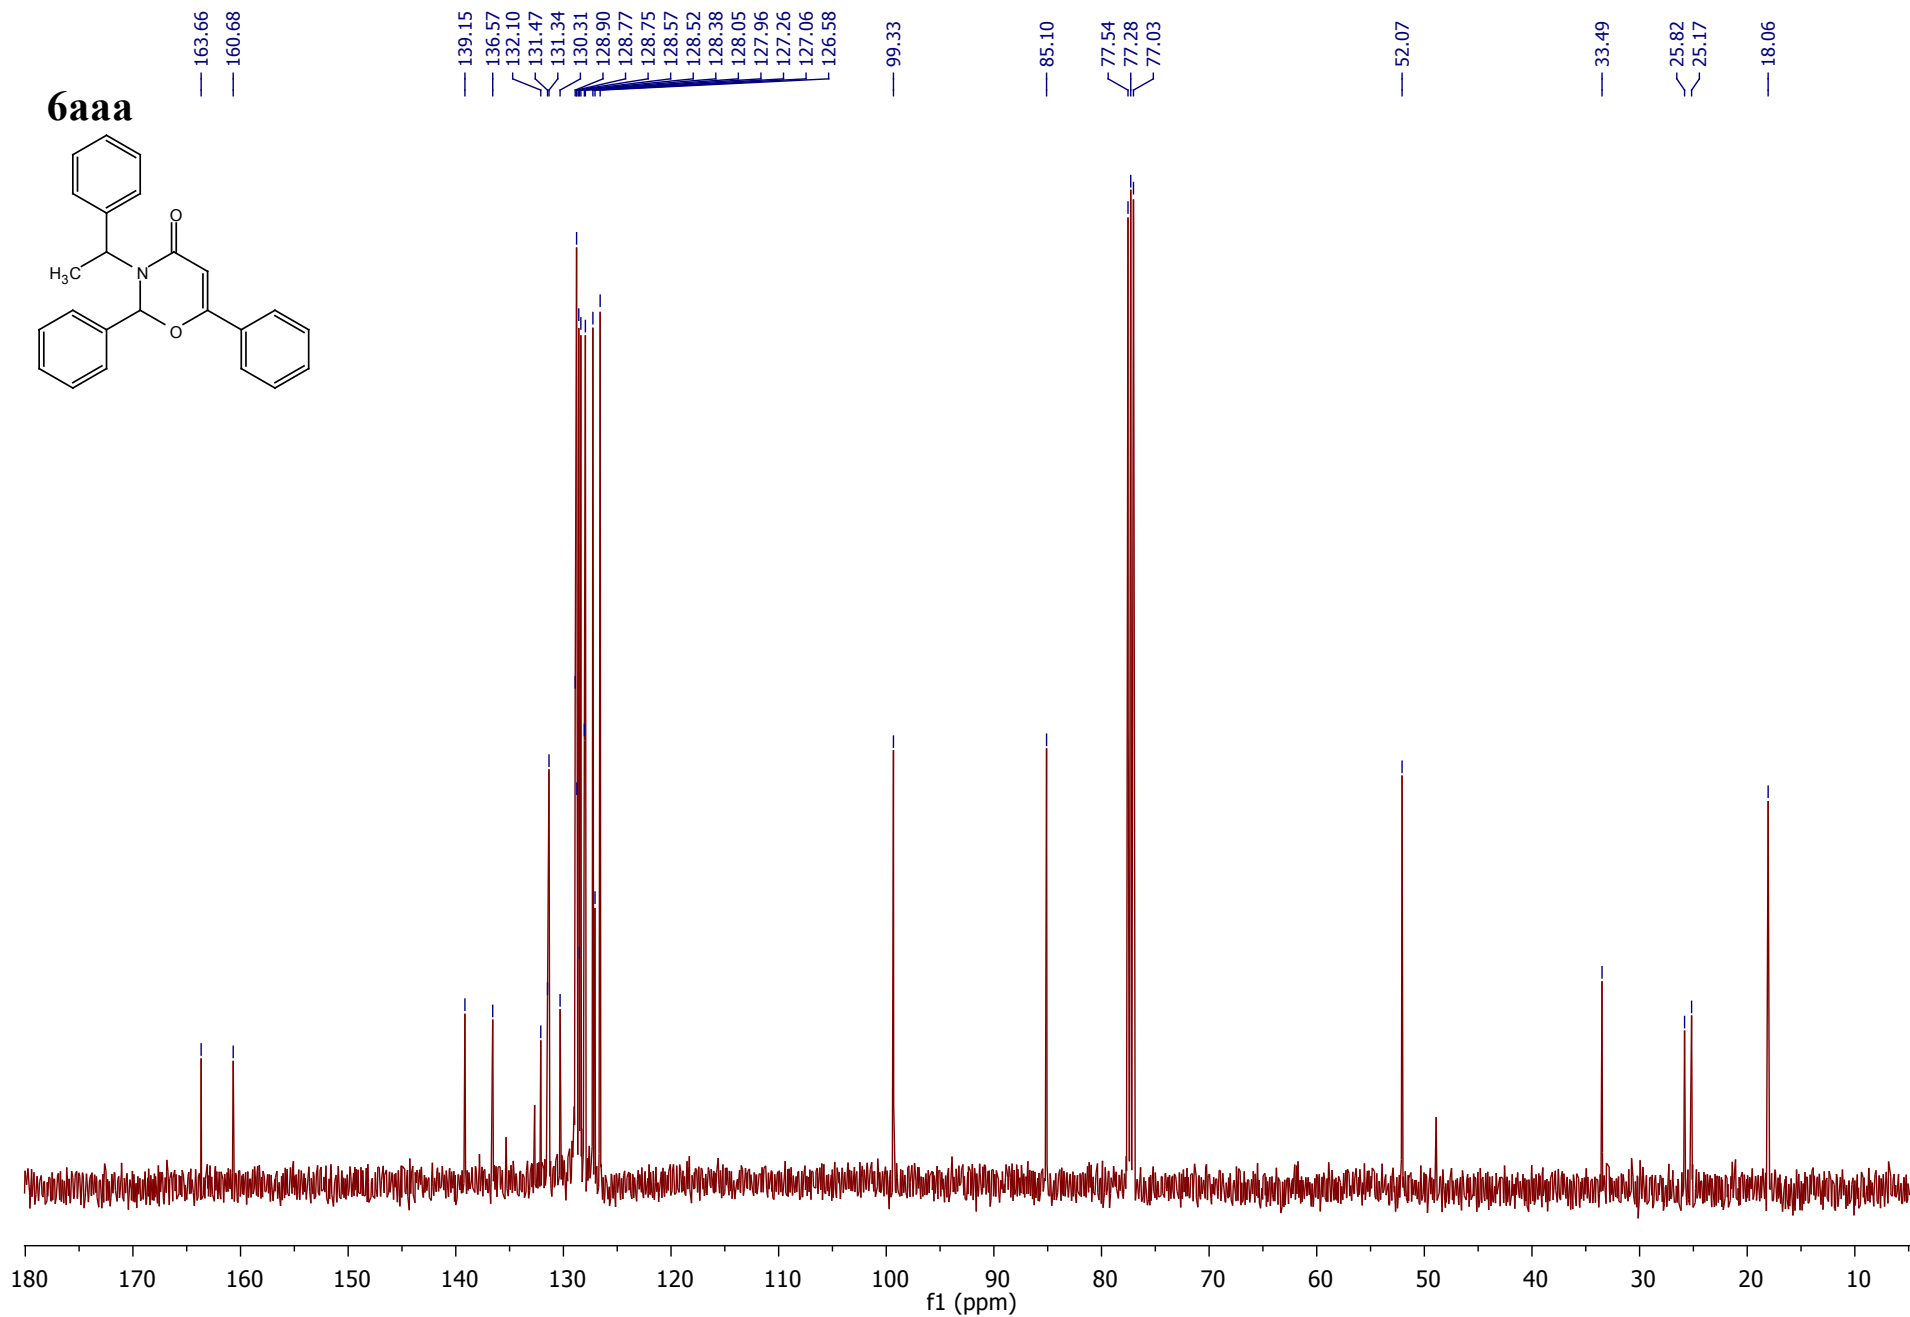

S15

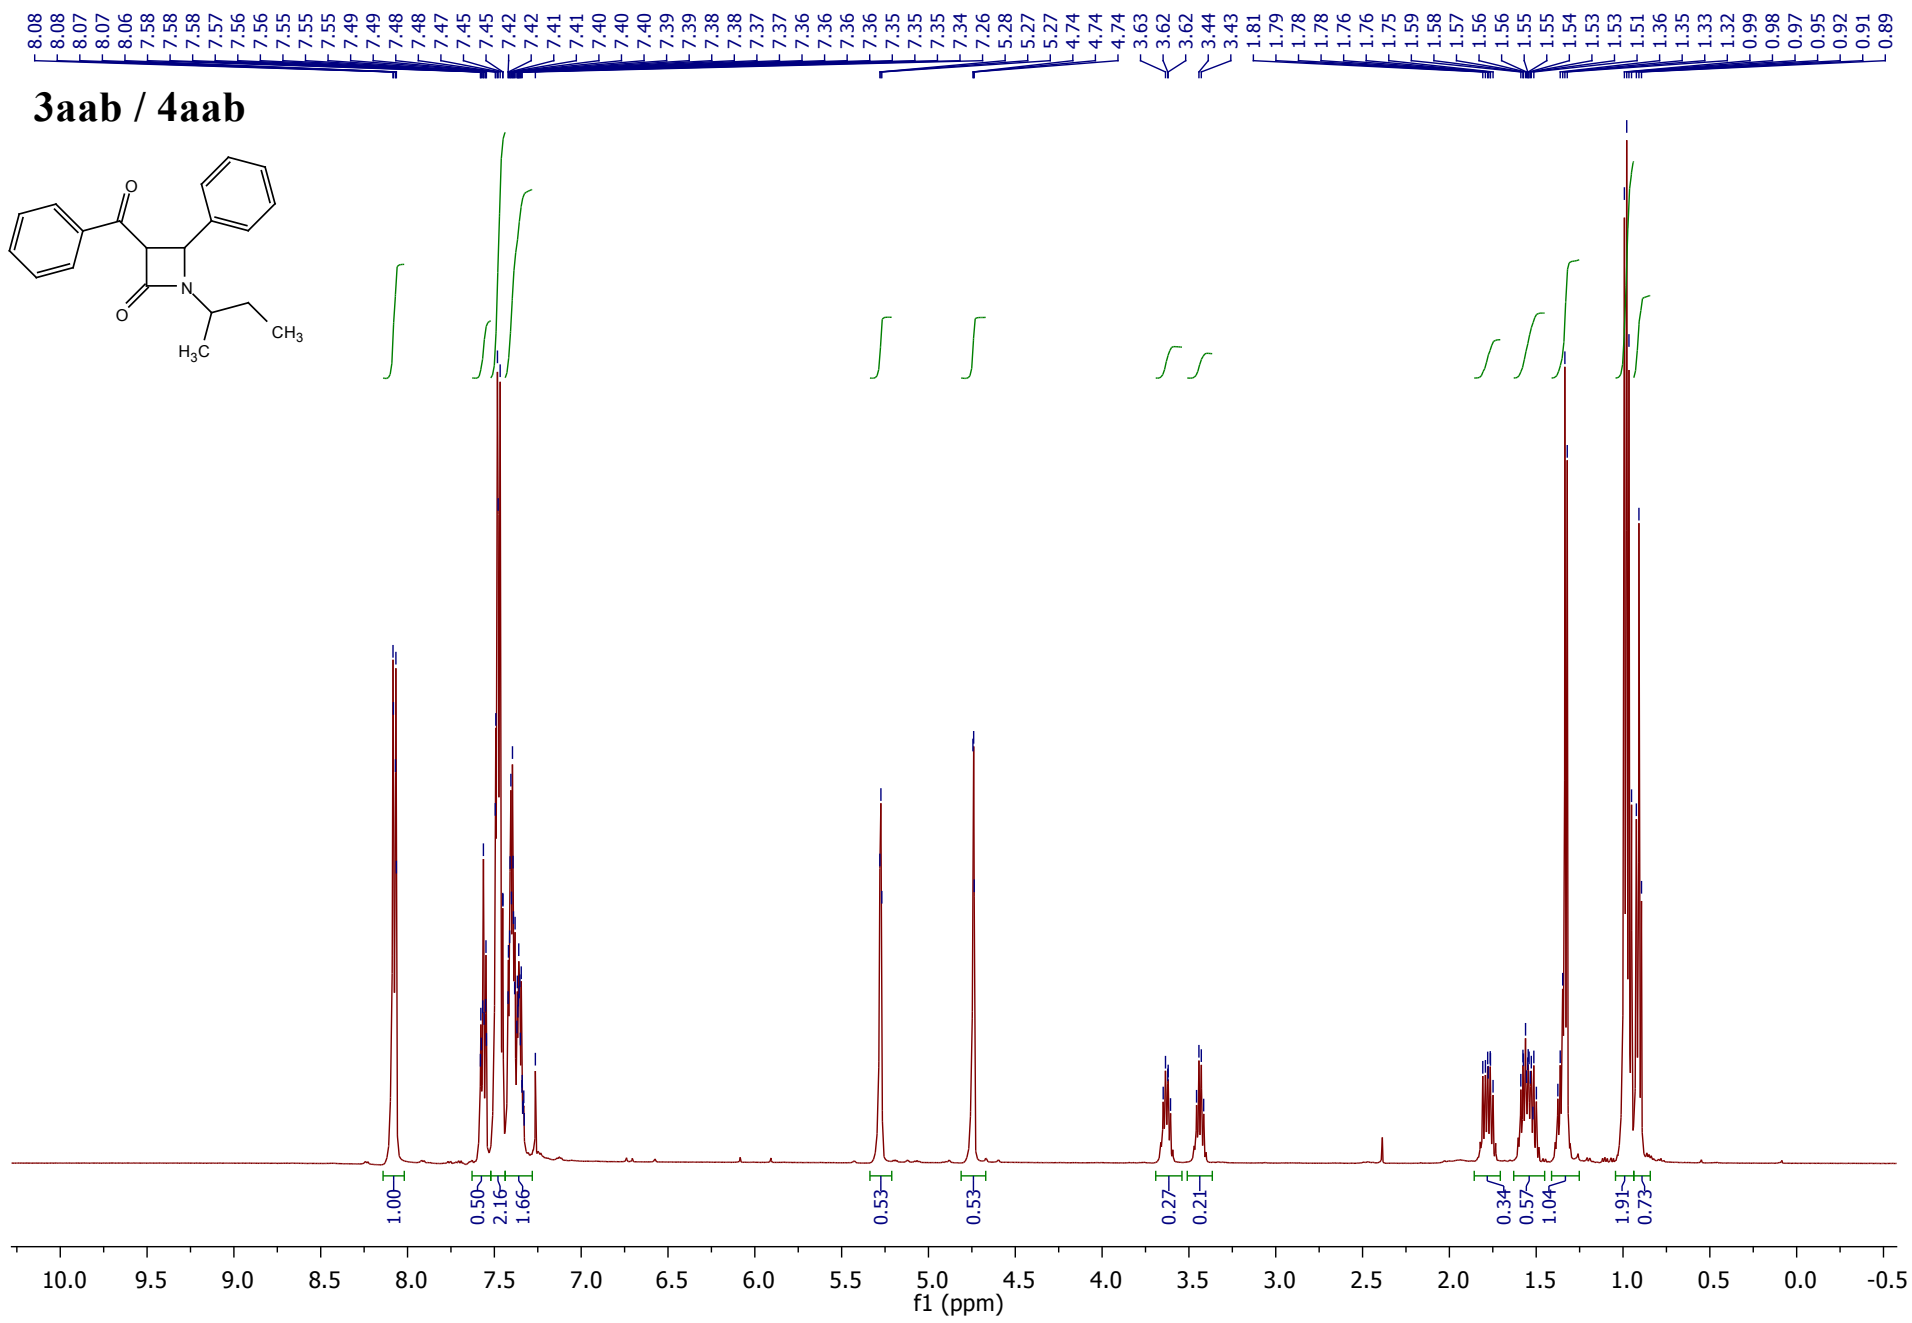



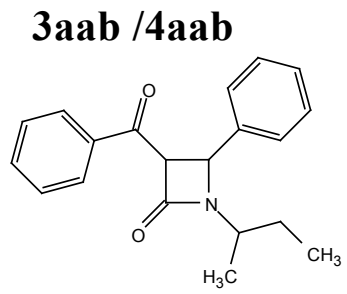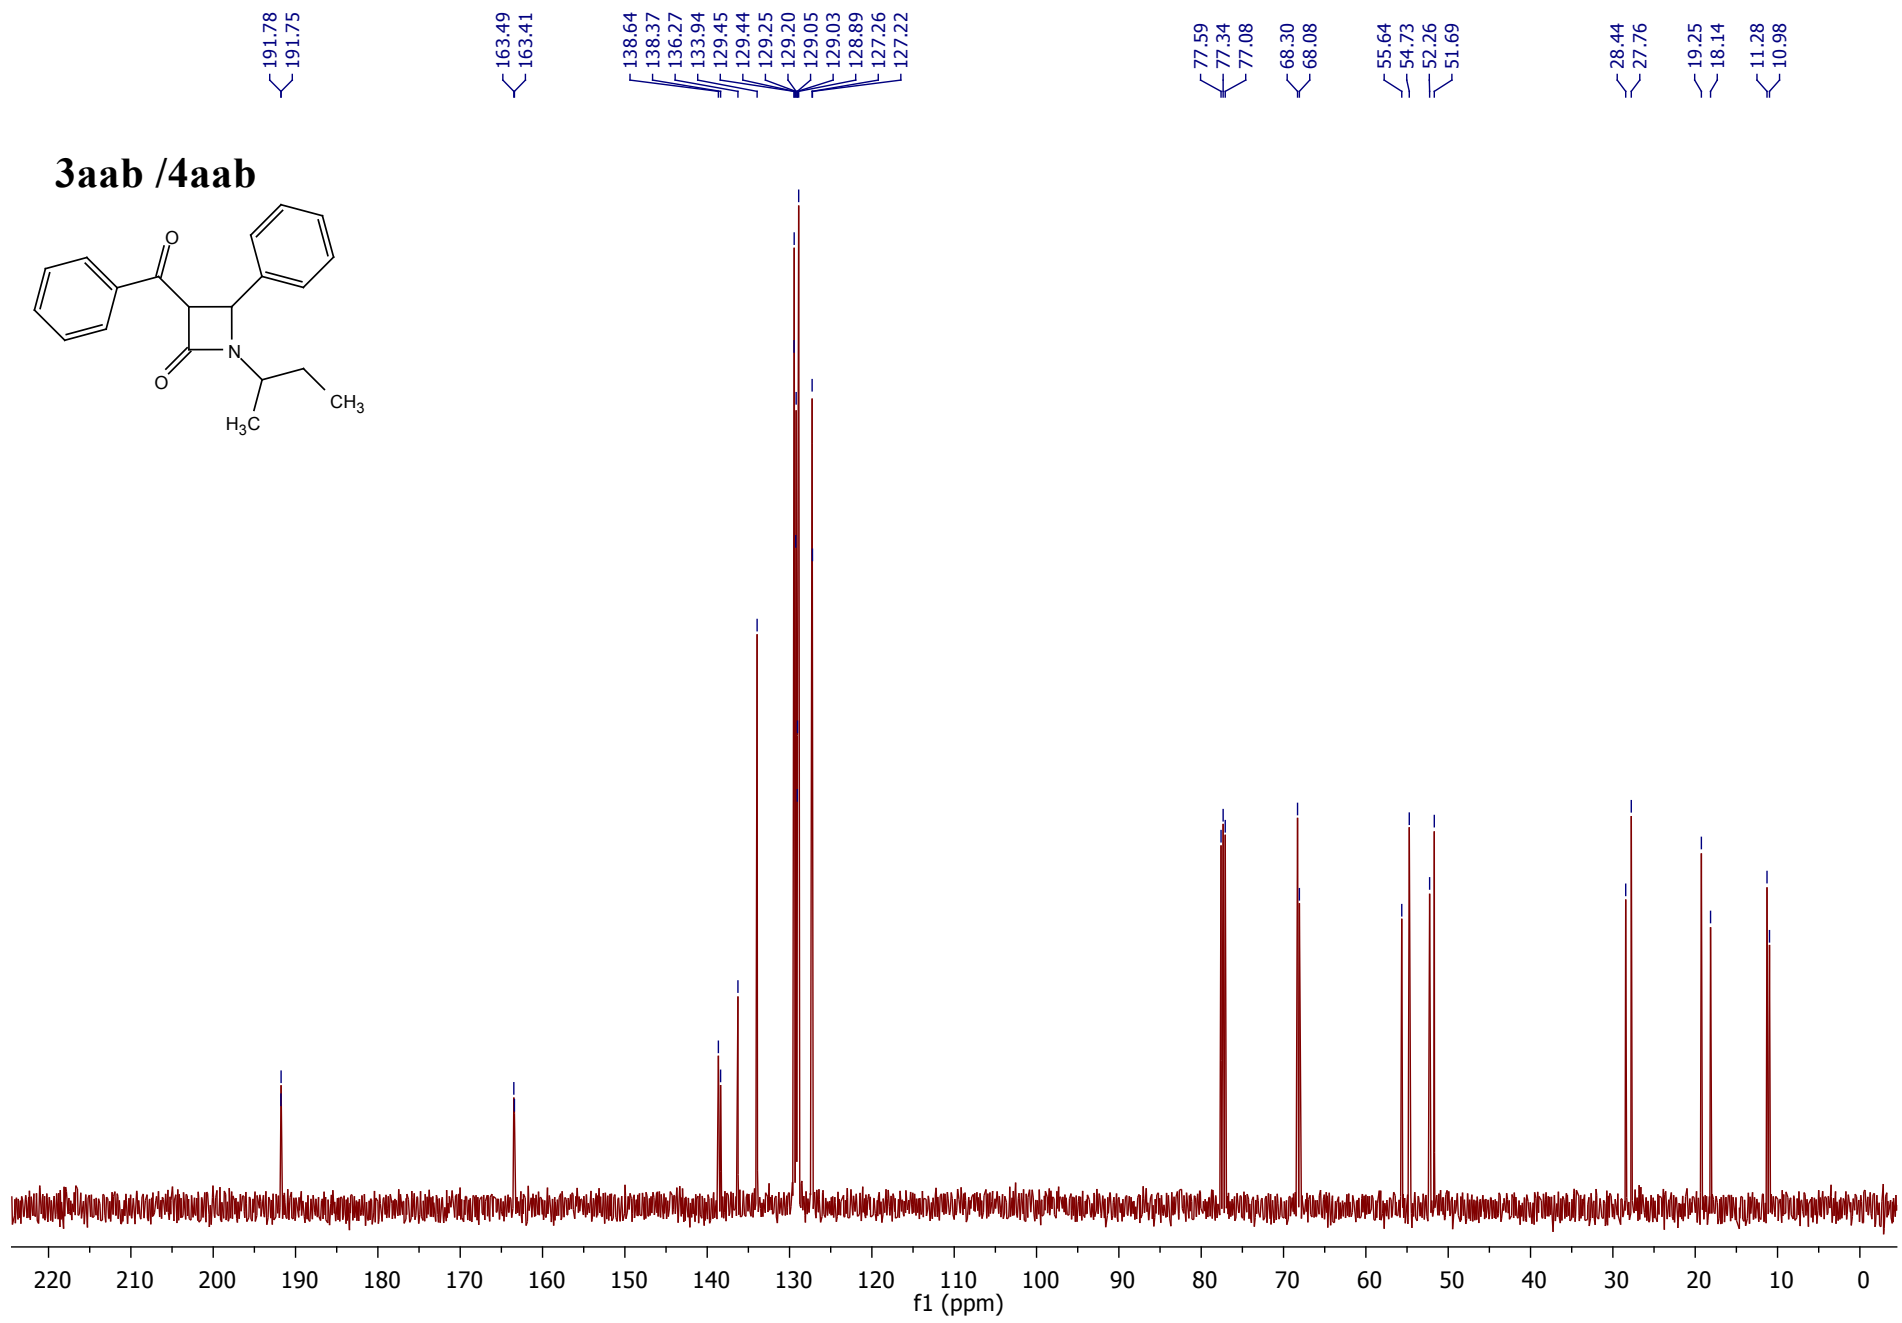

### 3aba / 4aba

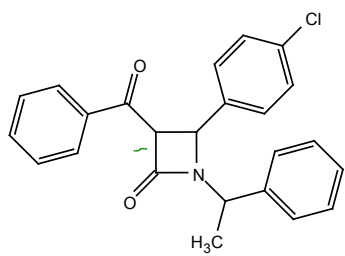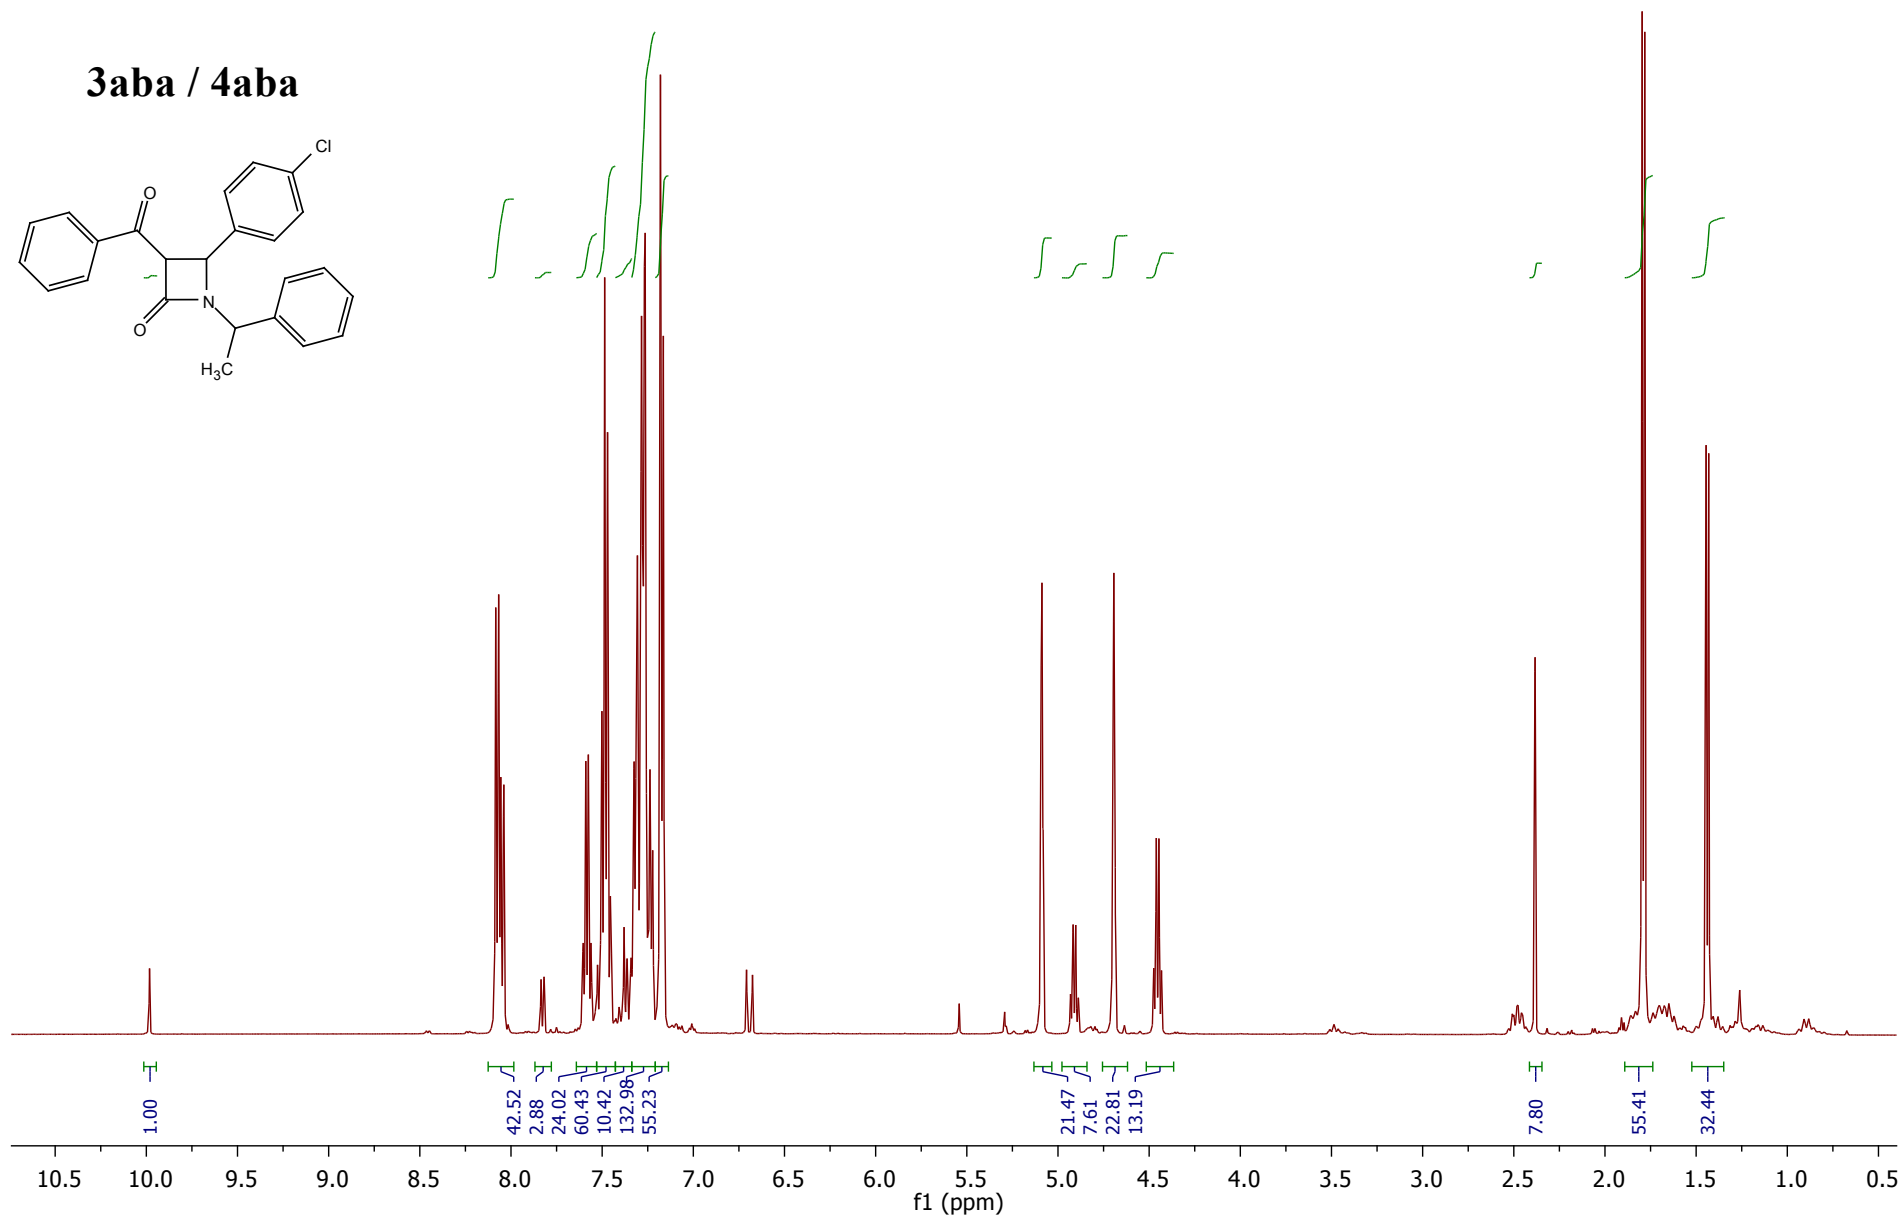

191.33  
191.09

163.12  
163.06  
142.13  
140.47  
139.57  
136.99  
136.05  
136.02  
135.87  
134.77  
134.67  
134.12  
134.10  
131.16  
129.70  
129.65  
129.48  
129.45  
129.35  
129.32  
129.14  
128.95  
128.67  
128.49  
128.21  
128.08  
127.70  
127.45  
127.08

77.55  
77.30  
77.04

68.35  
68.32

55.27  
55.01  
54.78  
53.77

27.95

20.12  
19.49

### 3aba / 4aba

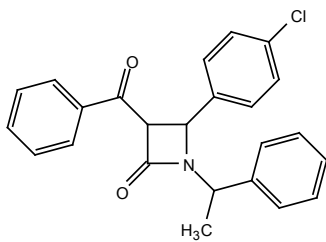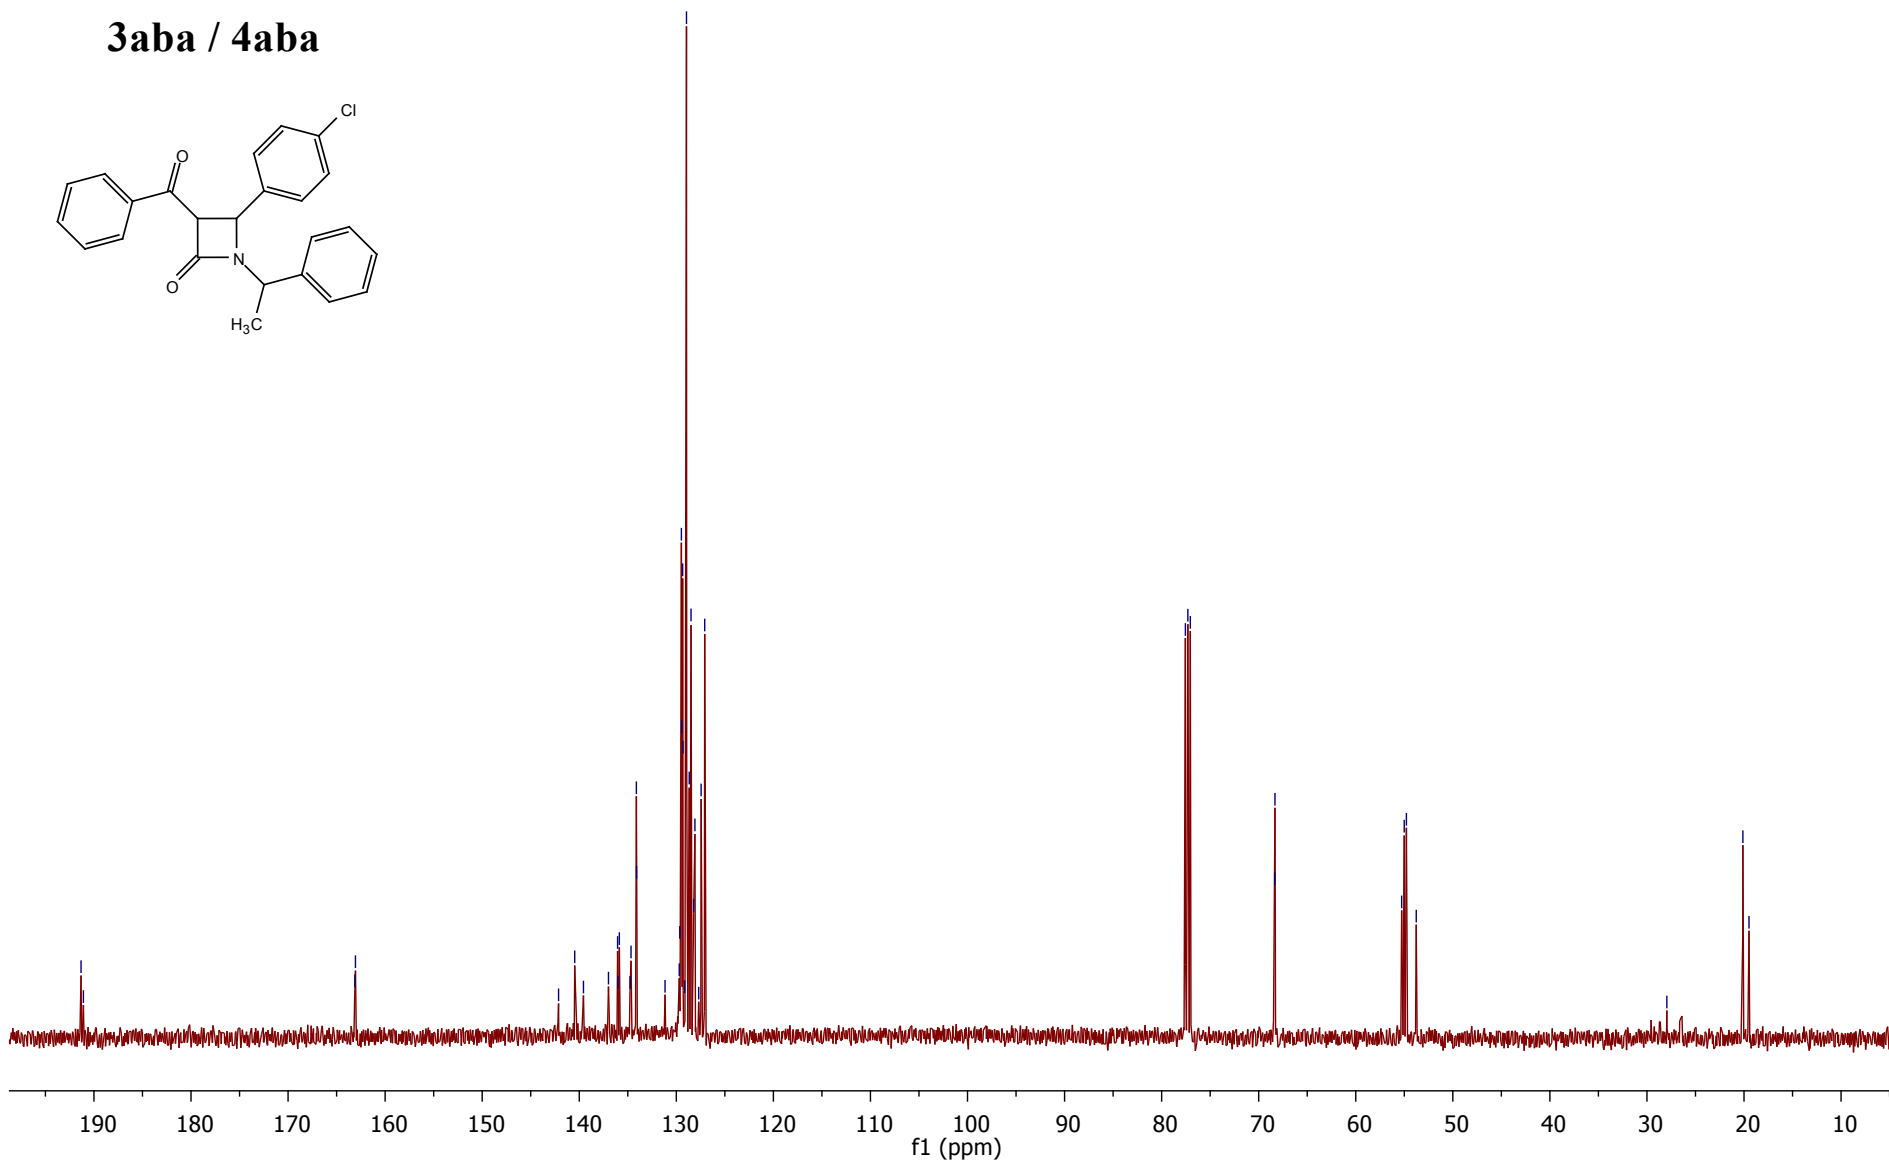

4aba

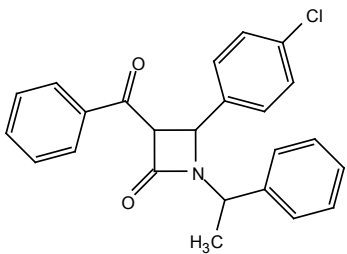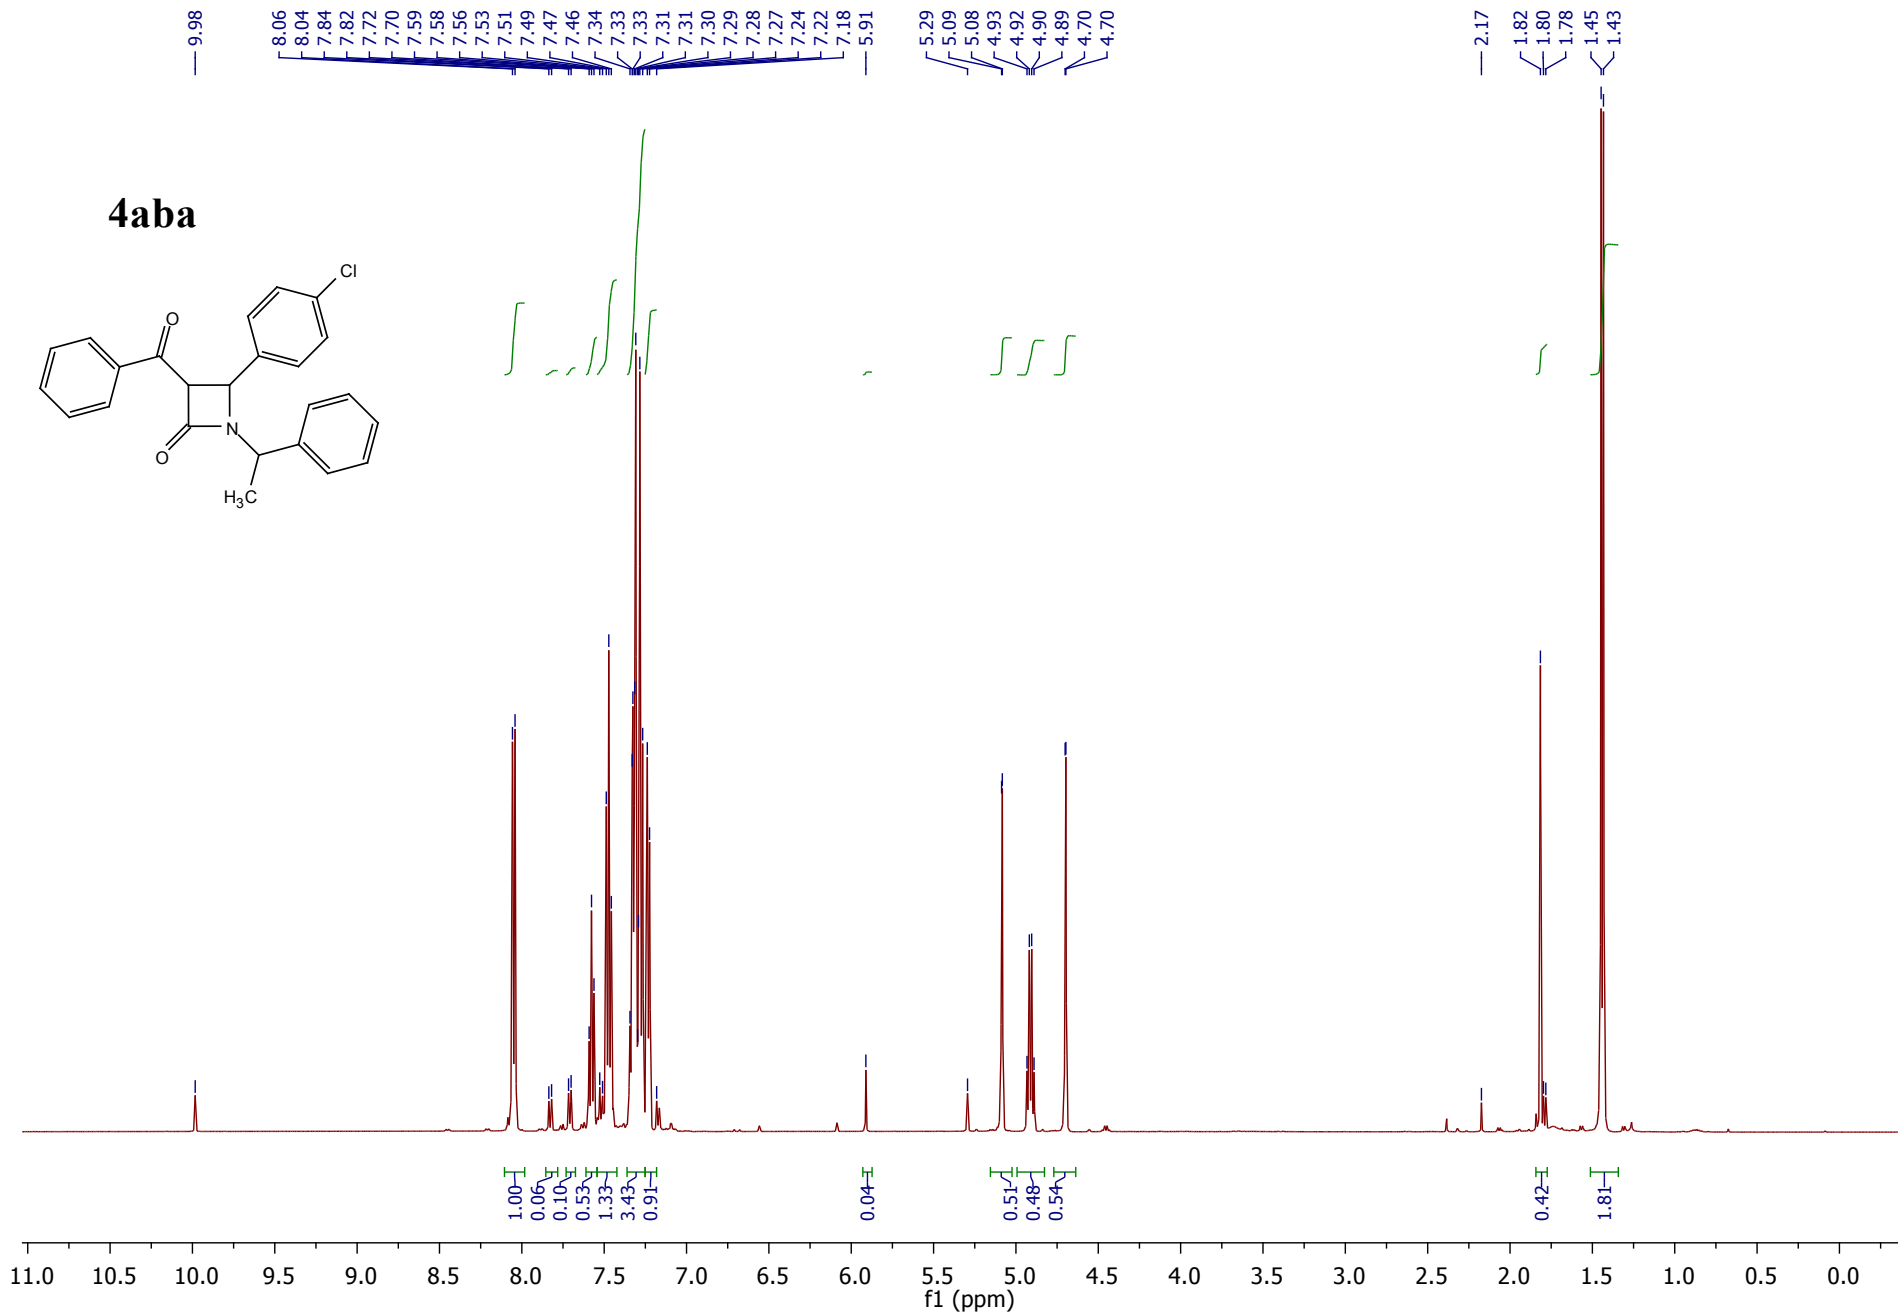

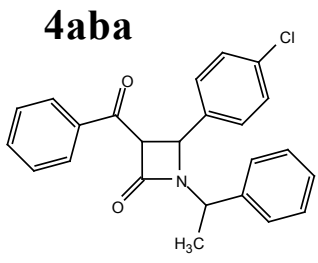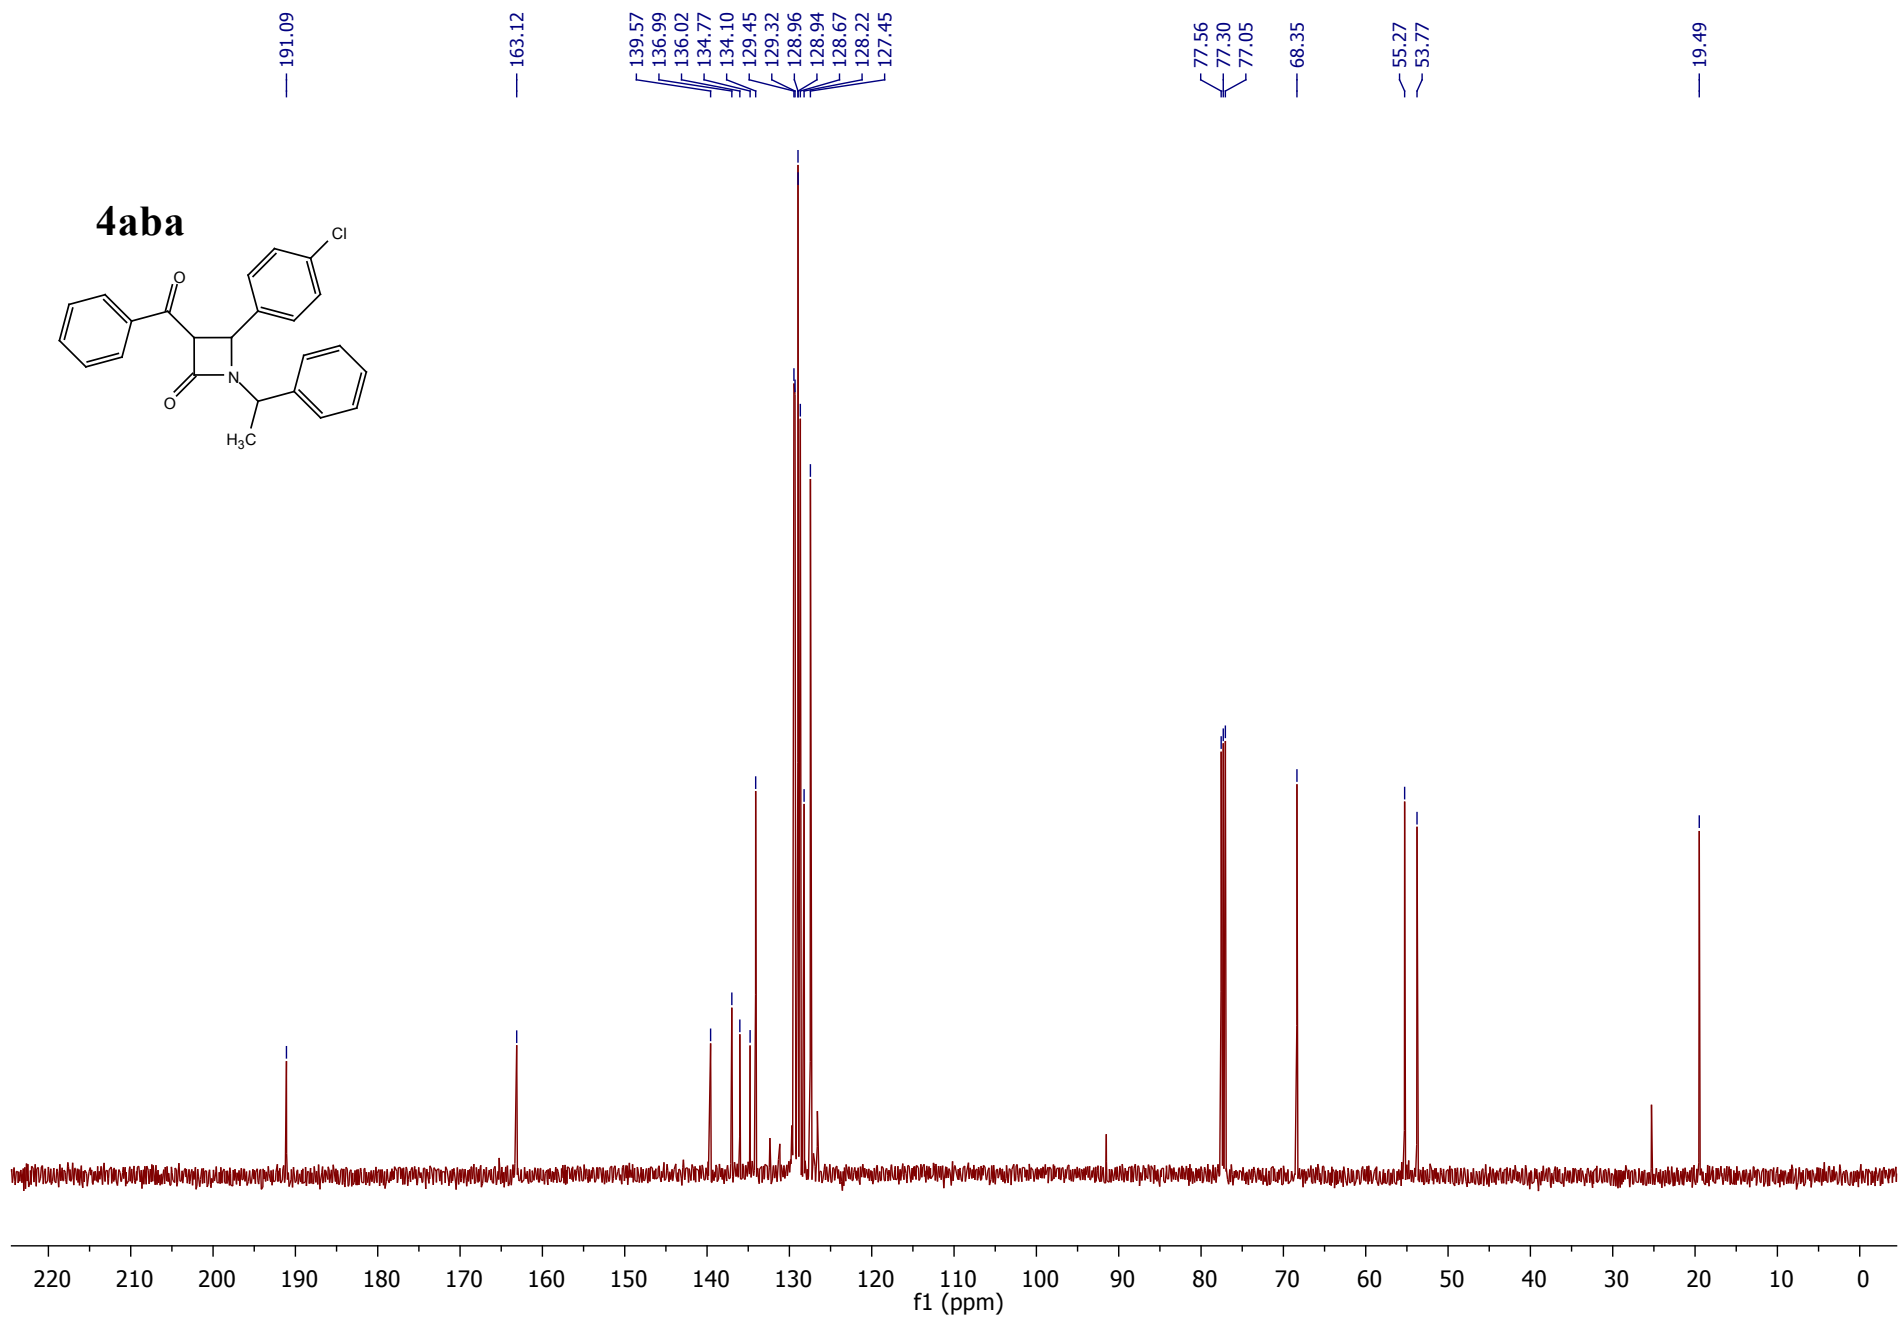

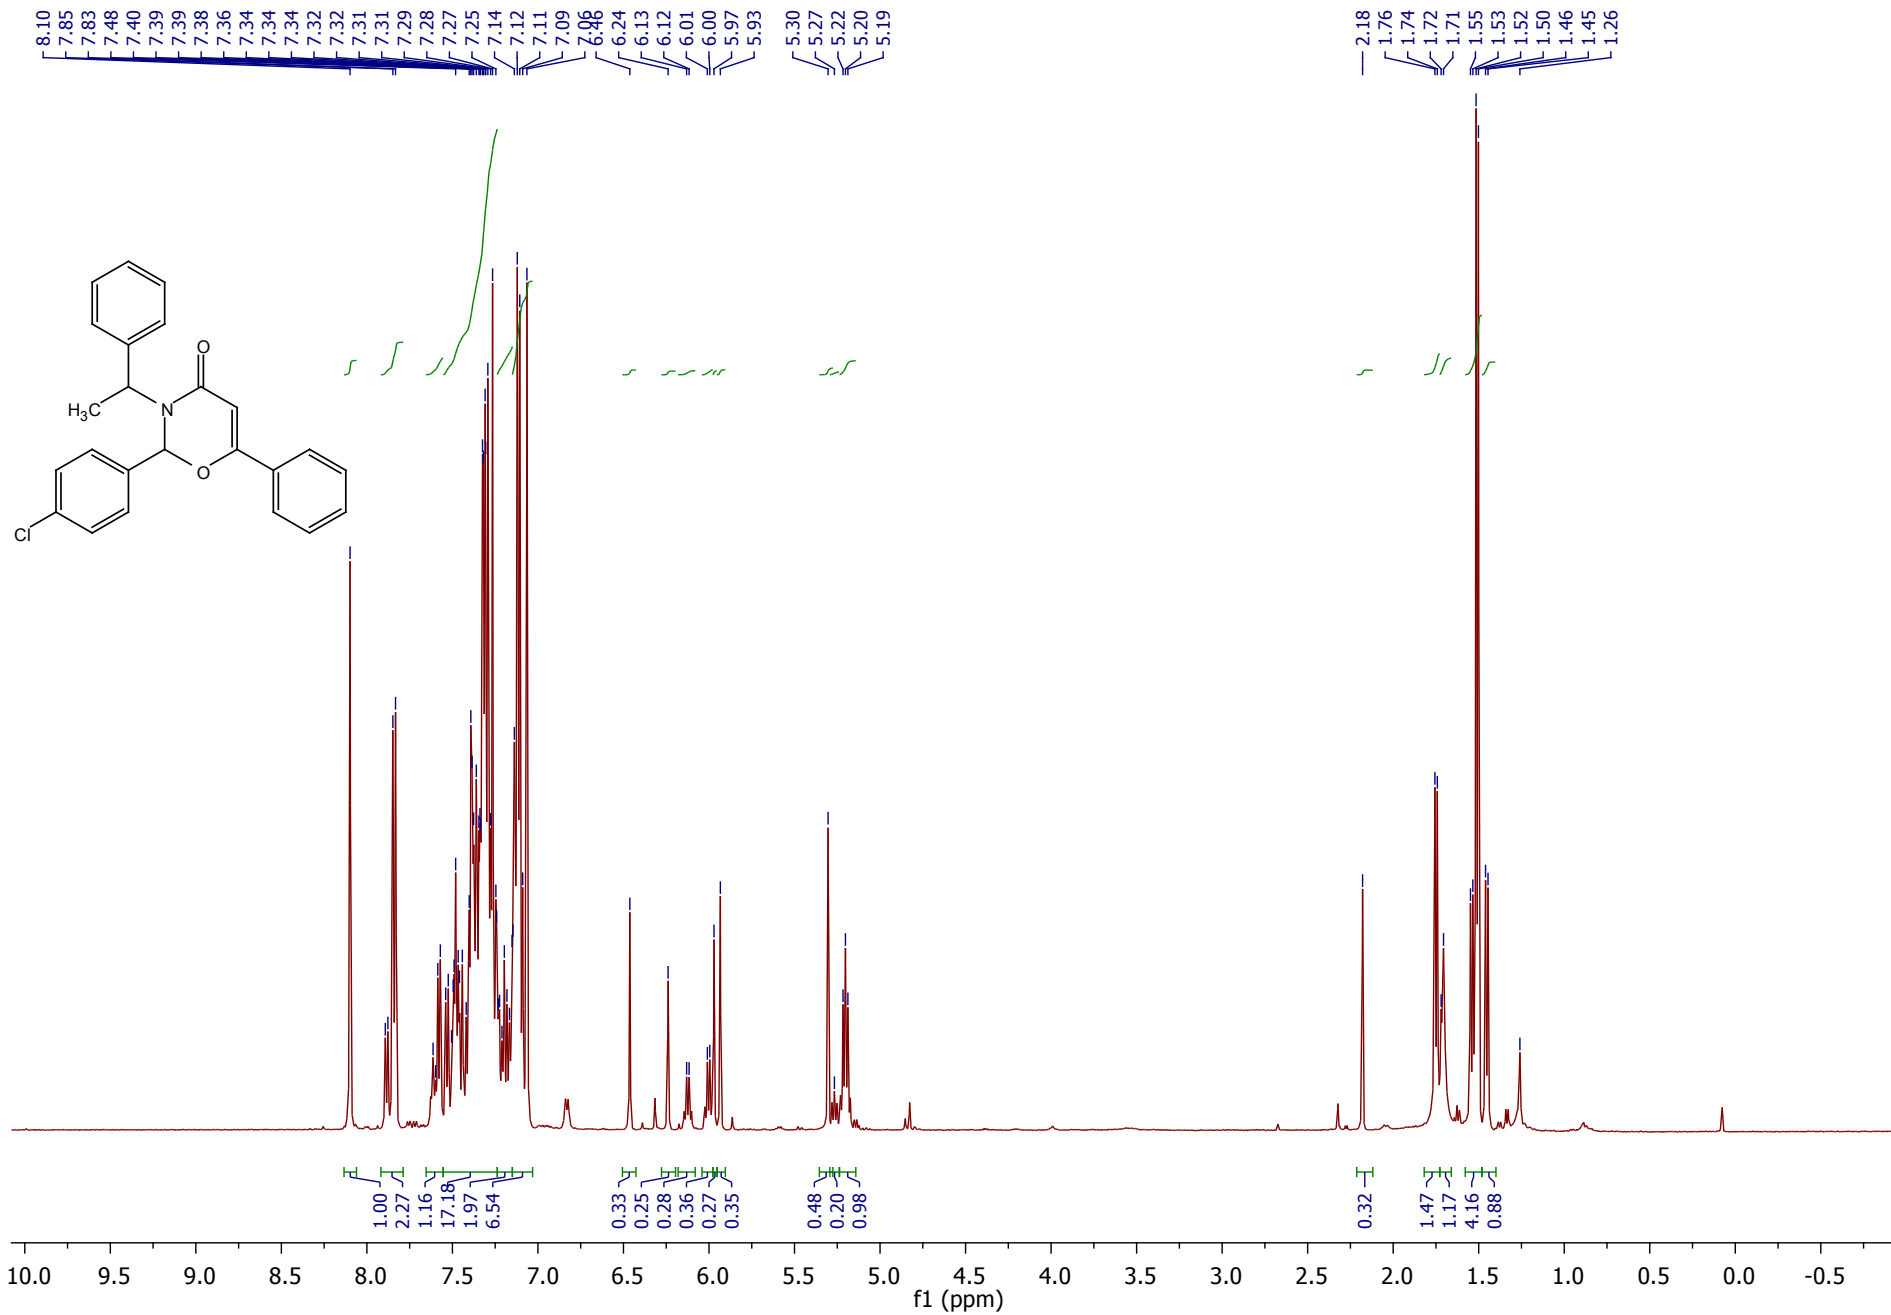

S22

# 5aba / 6aba

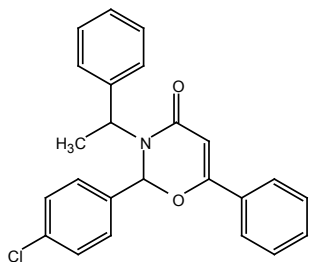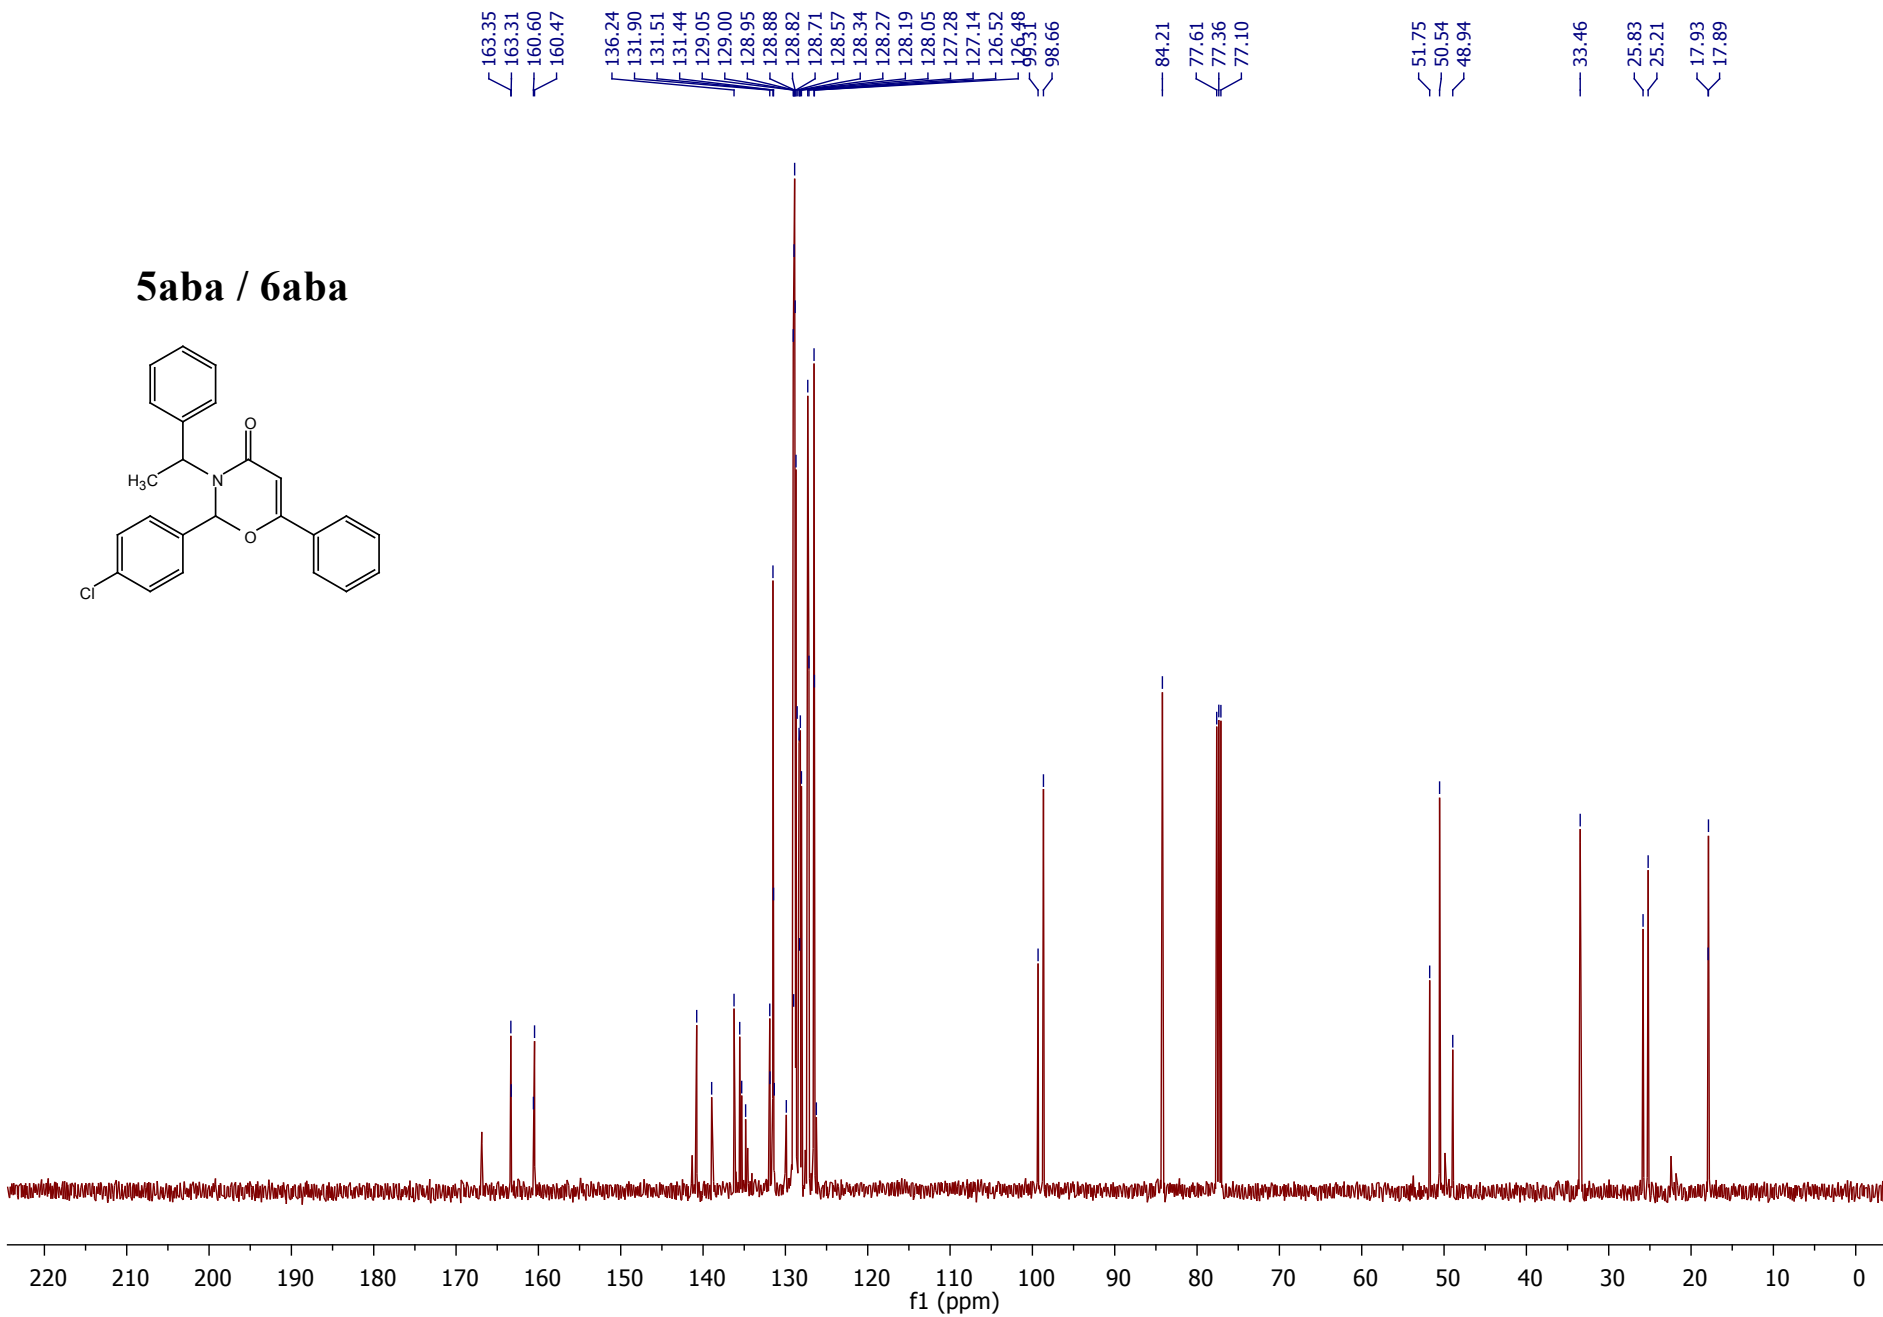

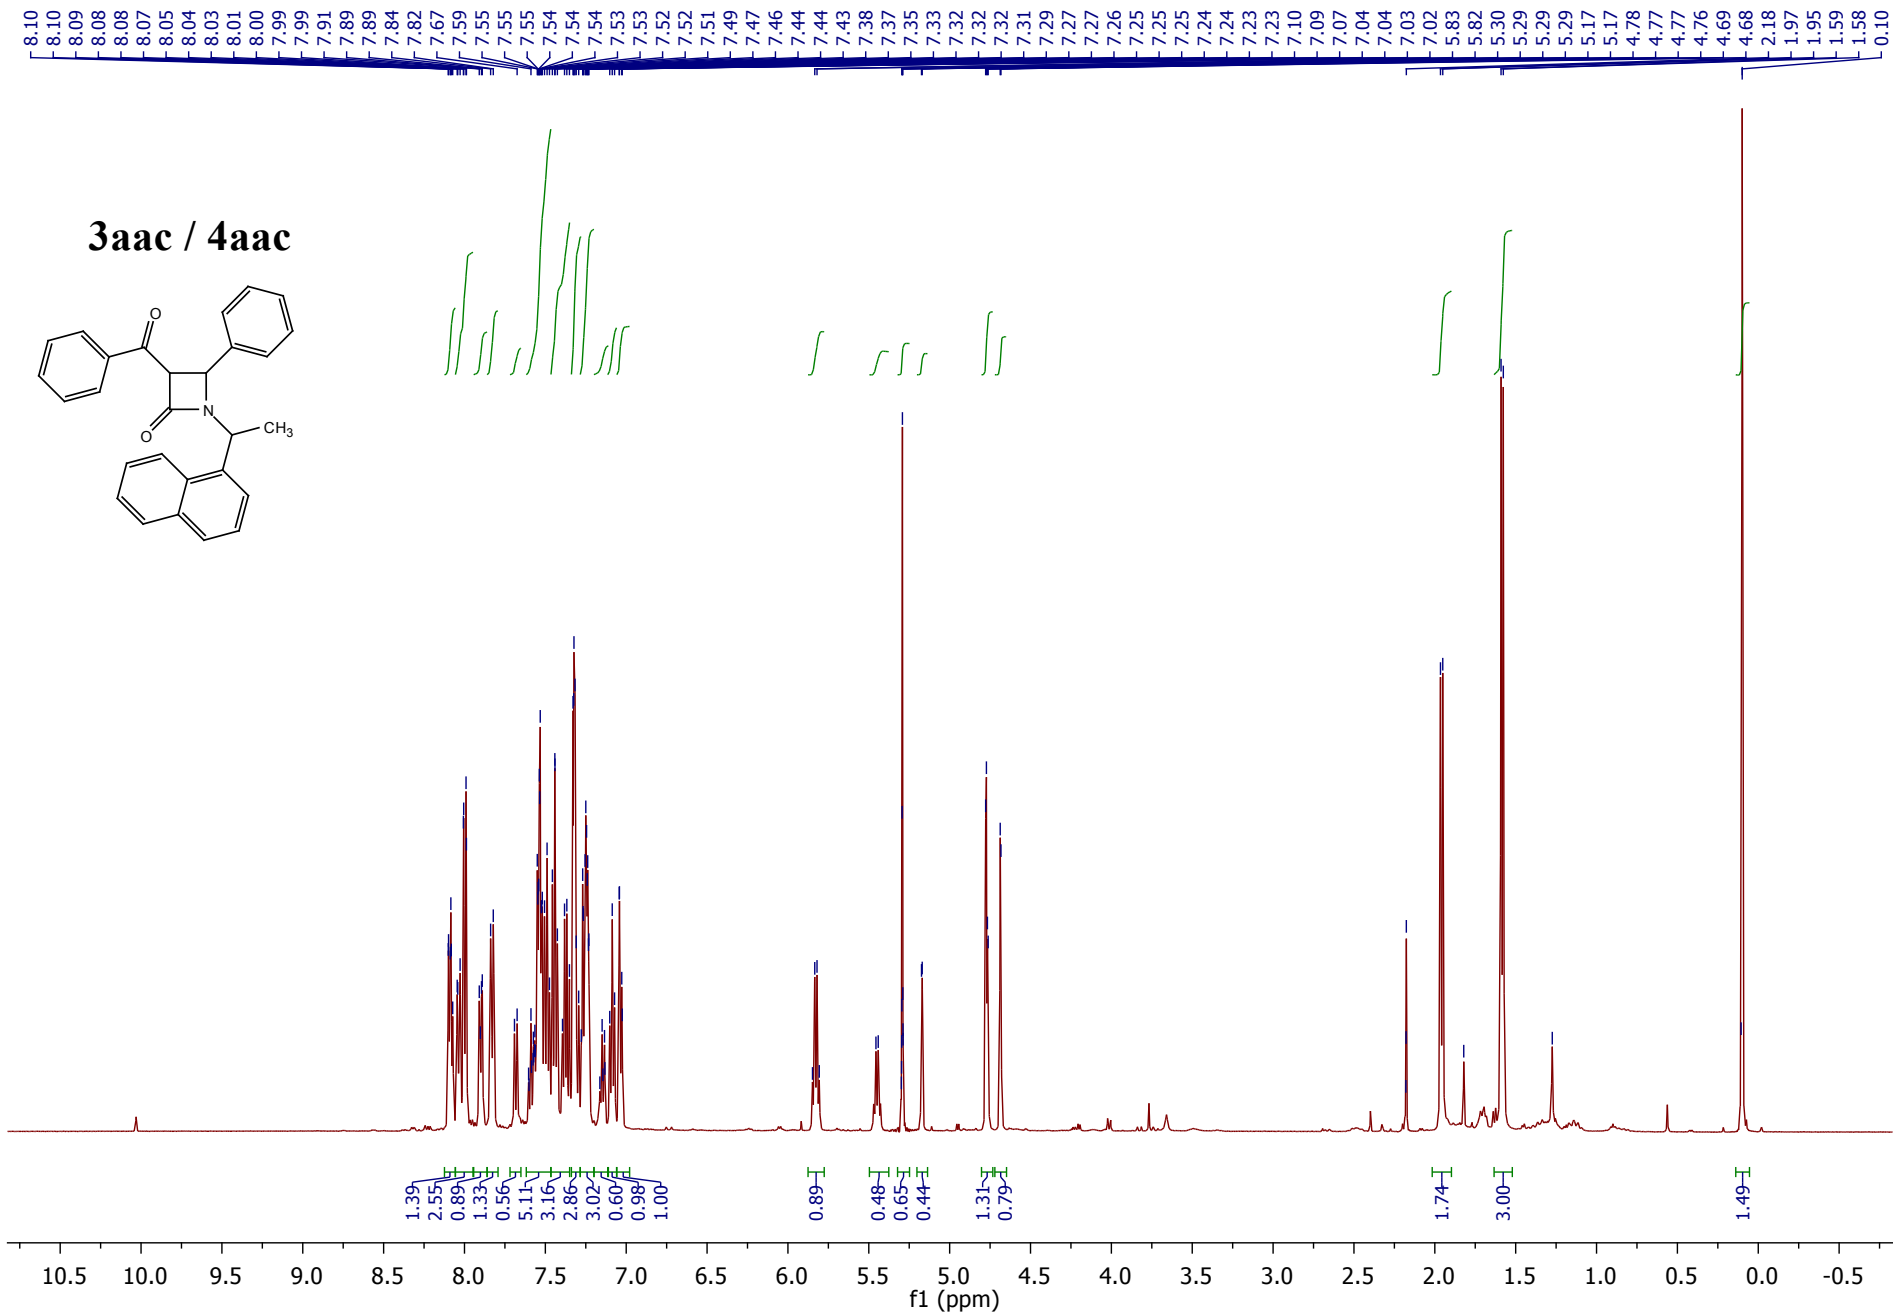

S24



# 3aac / 4aac

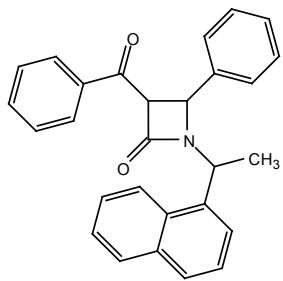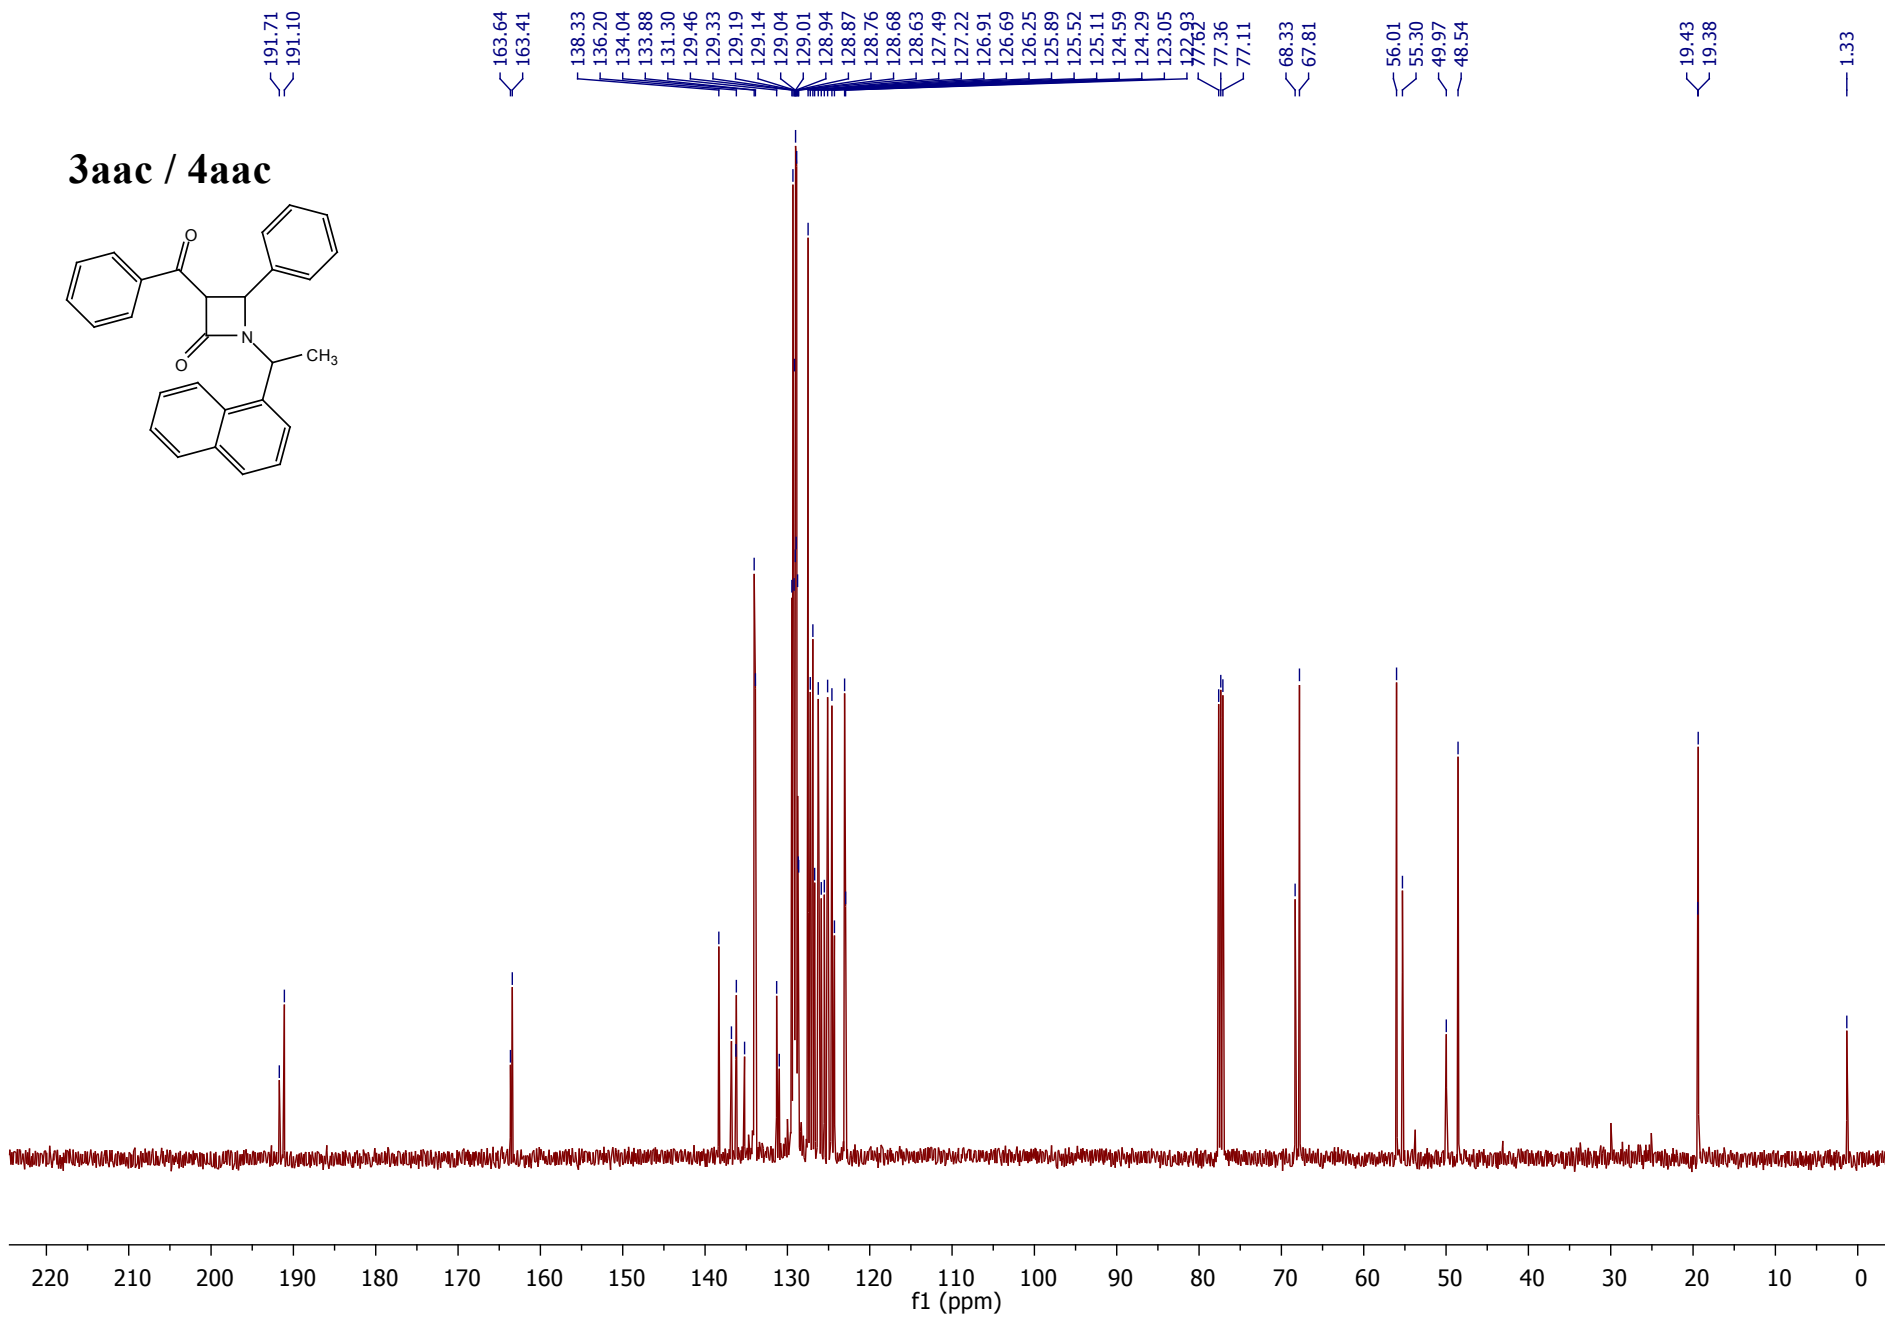

S25

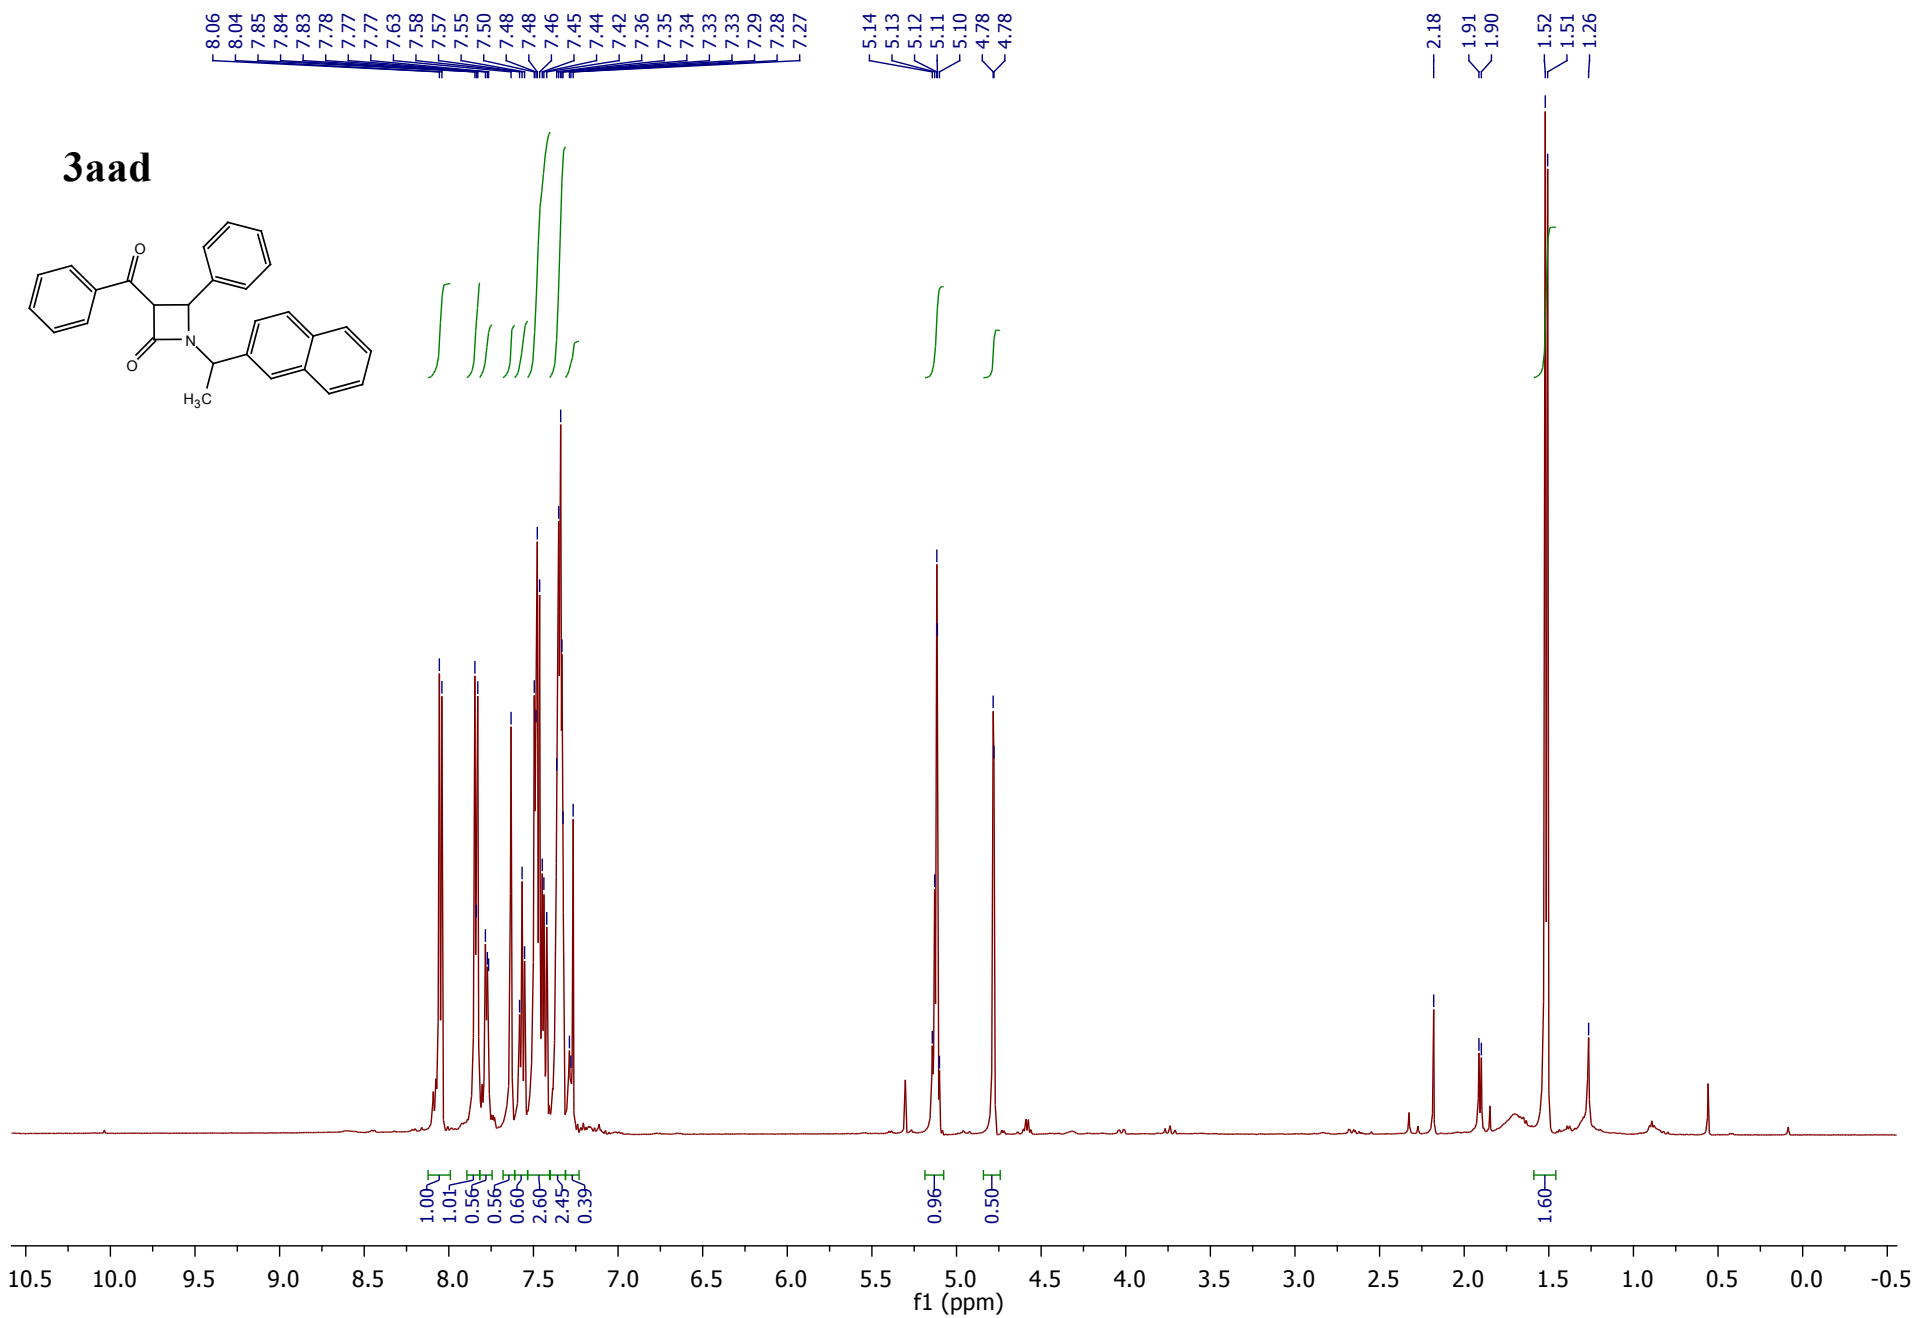

S26

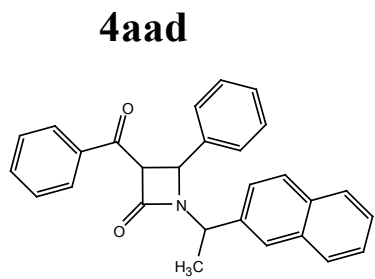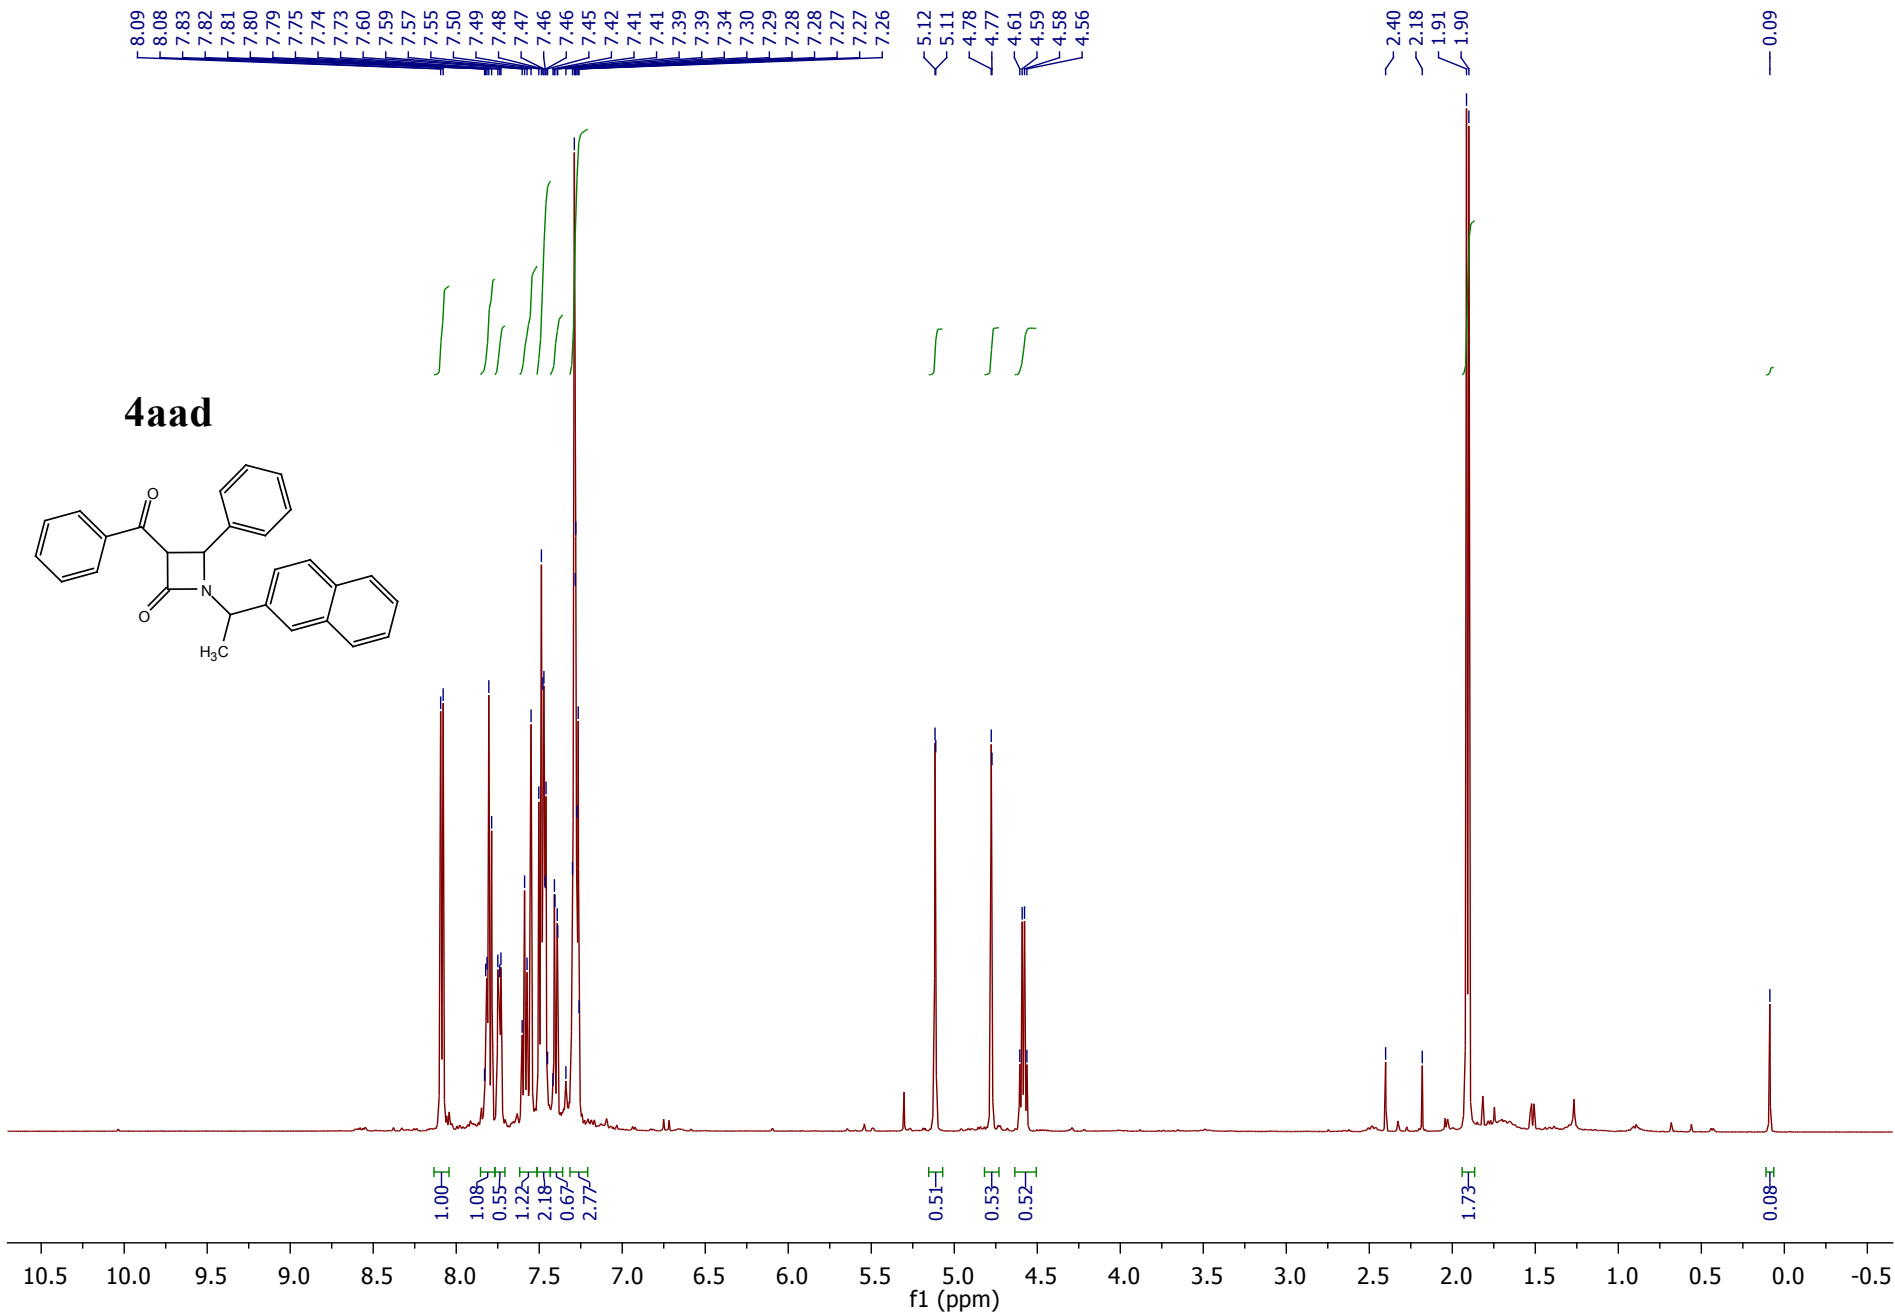

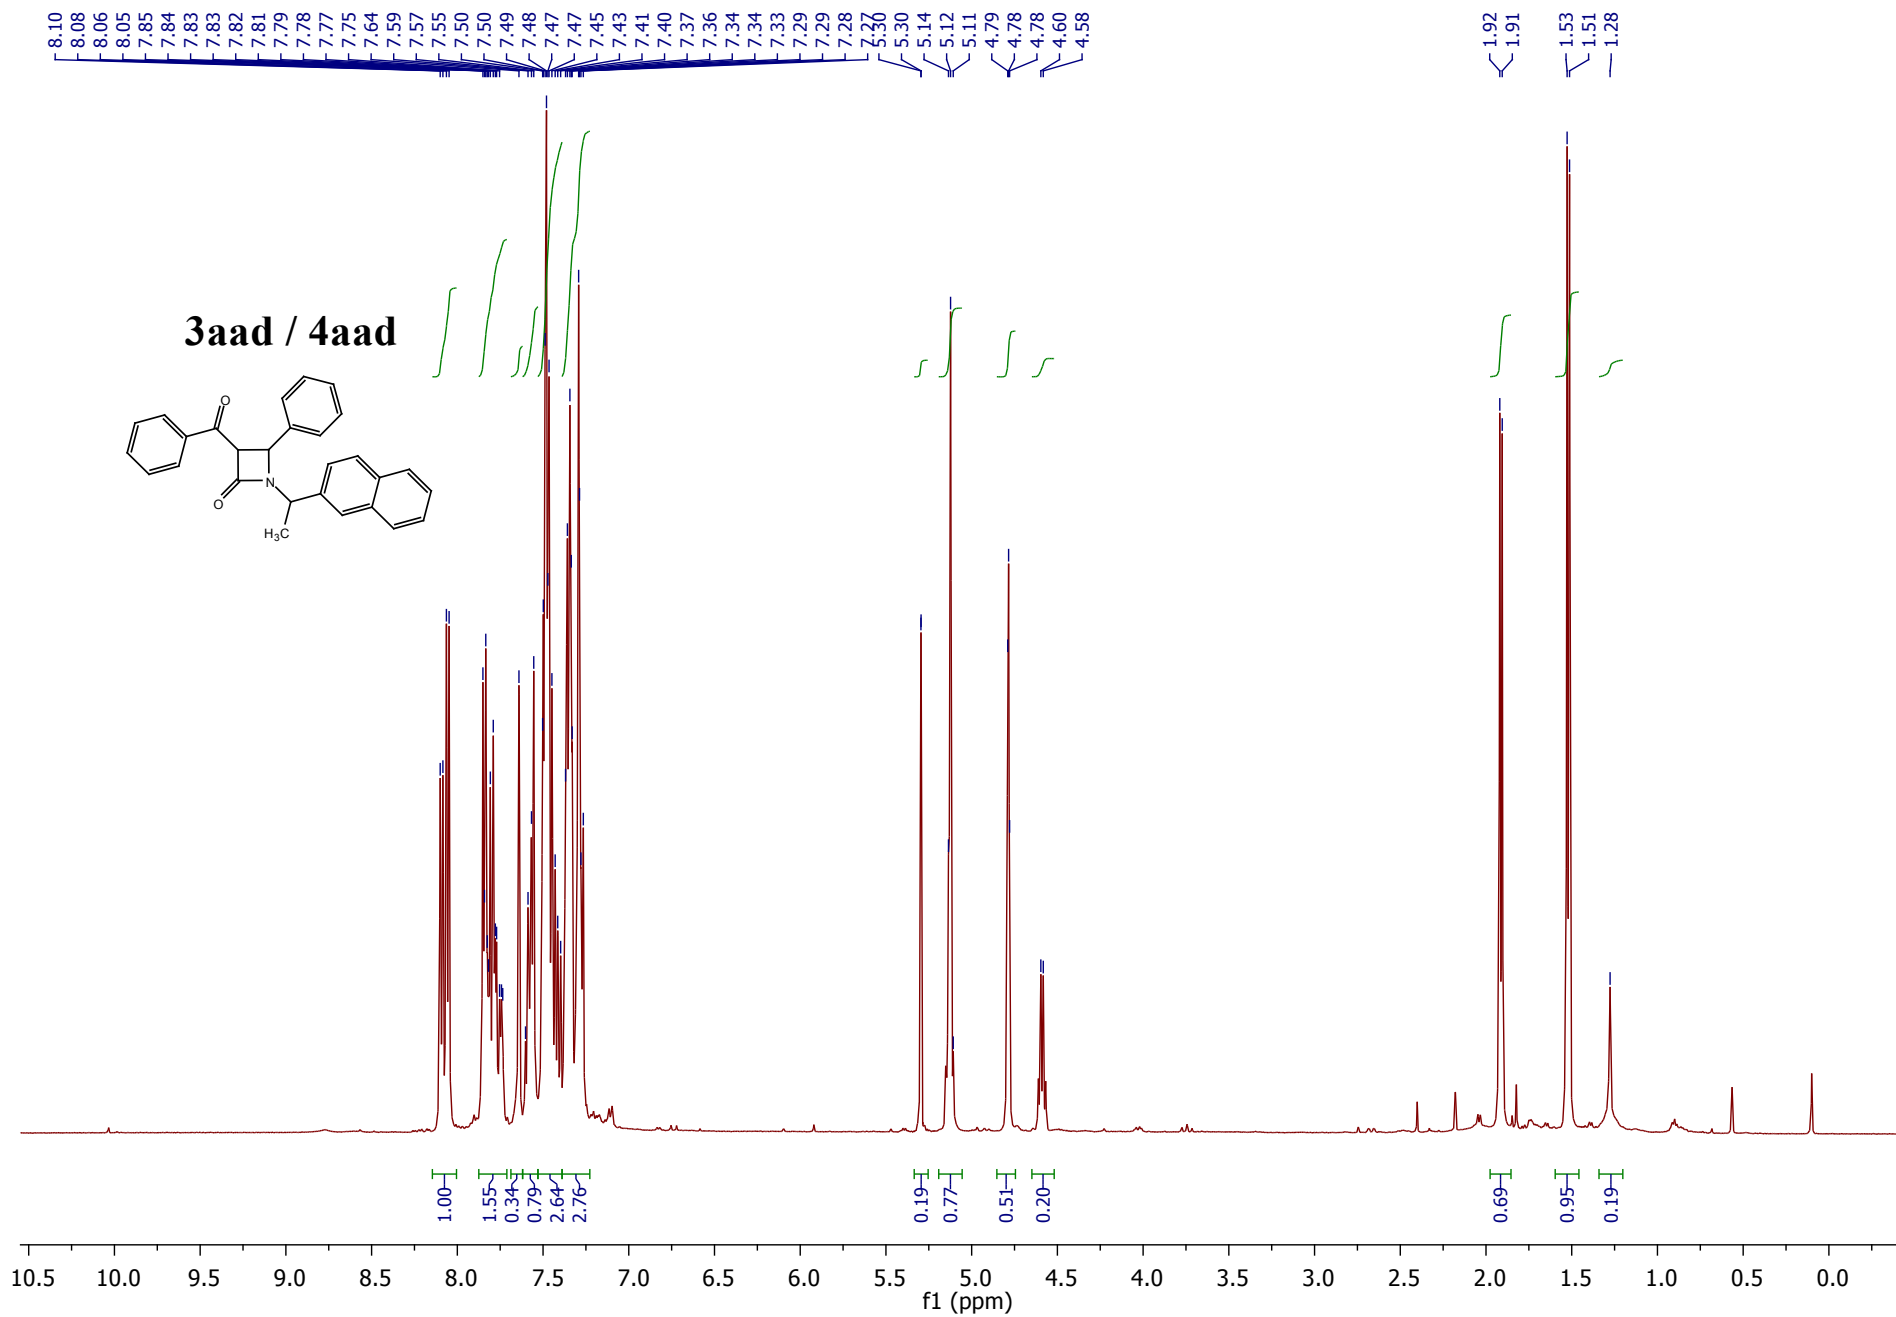

S28

### 3aad / 4aad

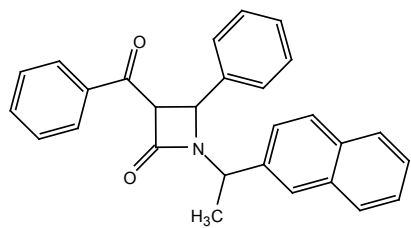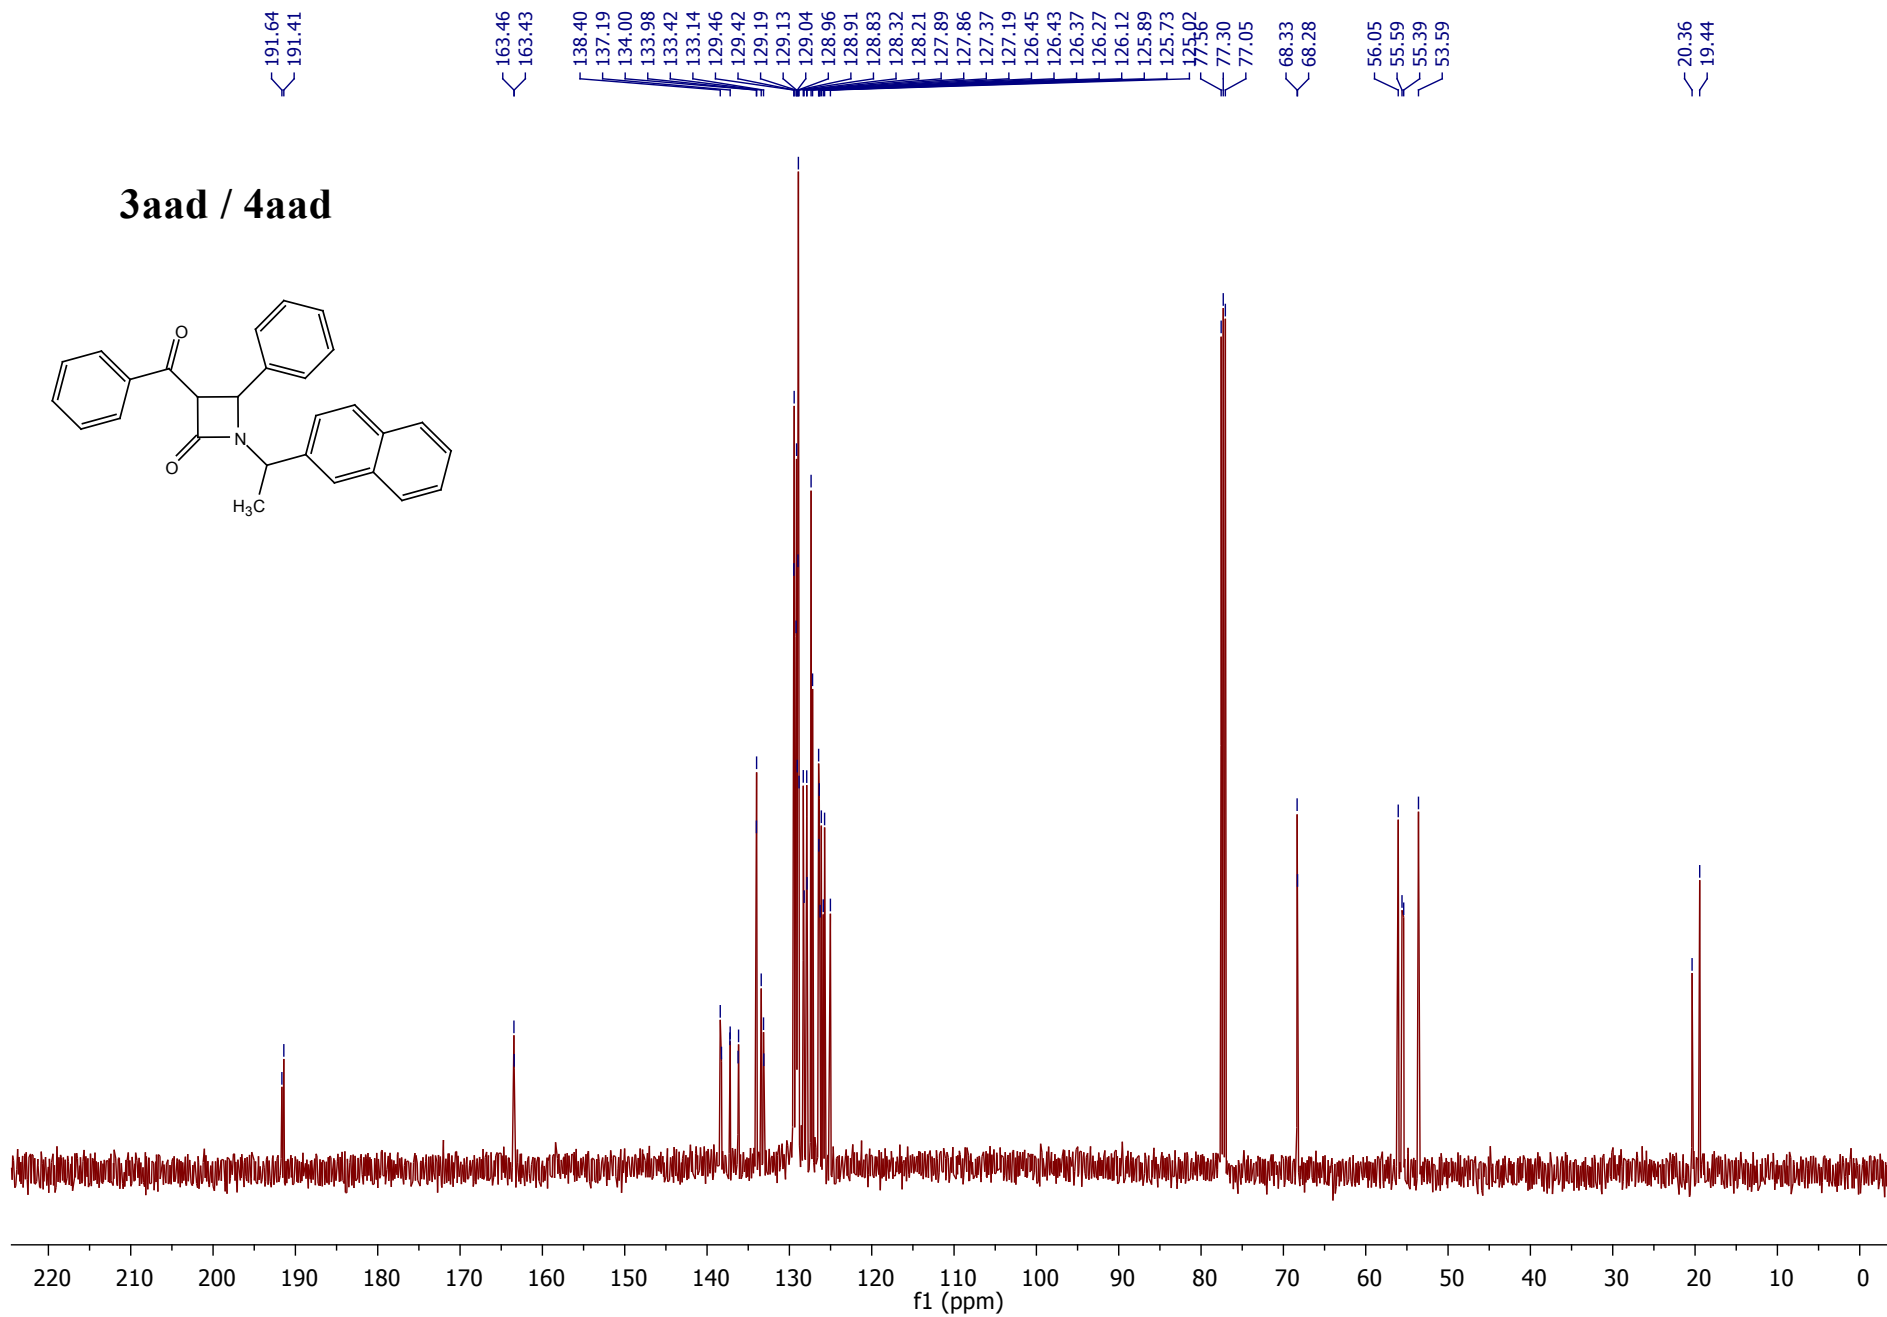

7.89  
7.87  
7.85  
7.84  
7.83  
7.77  
7.76  
7.51  
7.50  
7.50  
7.49  
7.48  
7.48  
7.46  
7.46  
7.43  
7.42  
7.40  
7.32  
7.31  
7.30  
7.29  
7.29  
7.28  
7.27  
7.26  
7.26  
7.25  
7.24  
7.23  
7.22  
7.17  
7.16  
7.16  
7.15  
7.14  
7.06  
5.05

4.95  
4.93  
4.80  
4.79  
4.46  
4.45  
4.42  
4.37  
4.36  
4.30  
4.27  
4.23  
4.23  
4.19  
4.19  
4.18  
4.17  
3.99

1.81  
1.79  
1.65  
1.38  
1.37

### 3baa / 4baa

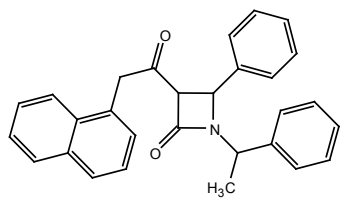

*Handwritten annotations in green ink:*  
A series of vertical lines and brackets in the aromatic region (7.0-7.9 ppm) indicate peak assignments and splitting patterns.  
A series of vertical lines and brackets in the aliphatic region (3.9-5.1 ppm) indicate peak assignments and splitting patterns.

*Handwritten annotations in green ink:*  
A series of vertical lines and brackets in the aliphatic region (3.9-5.1 ppm) indicate peak assignments and splitting patterns.

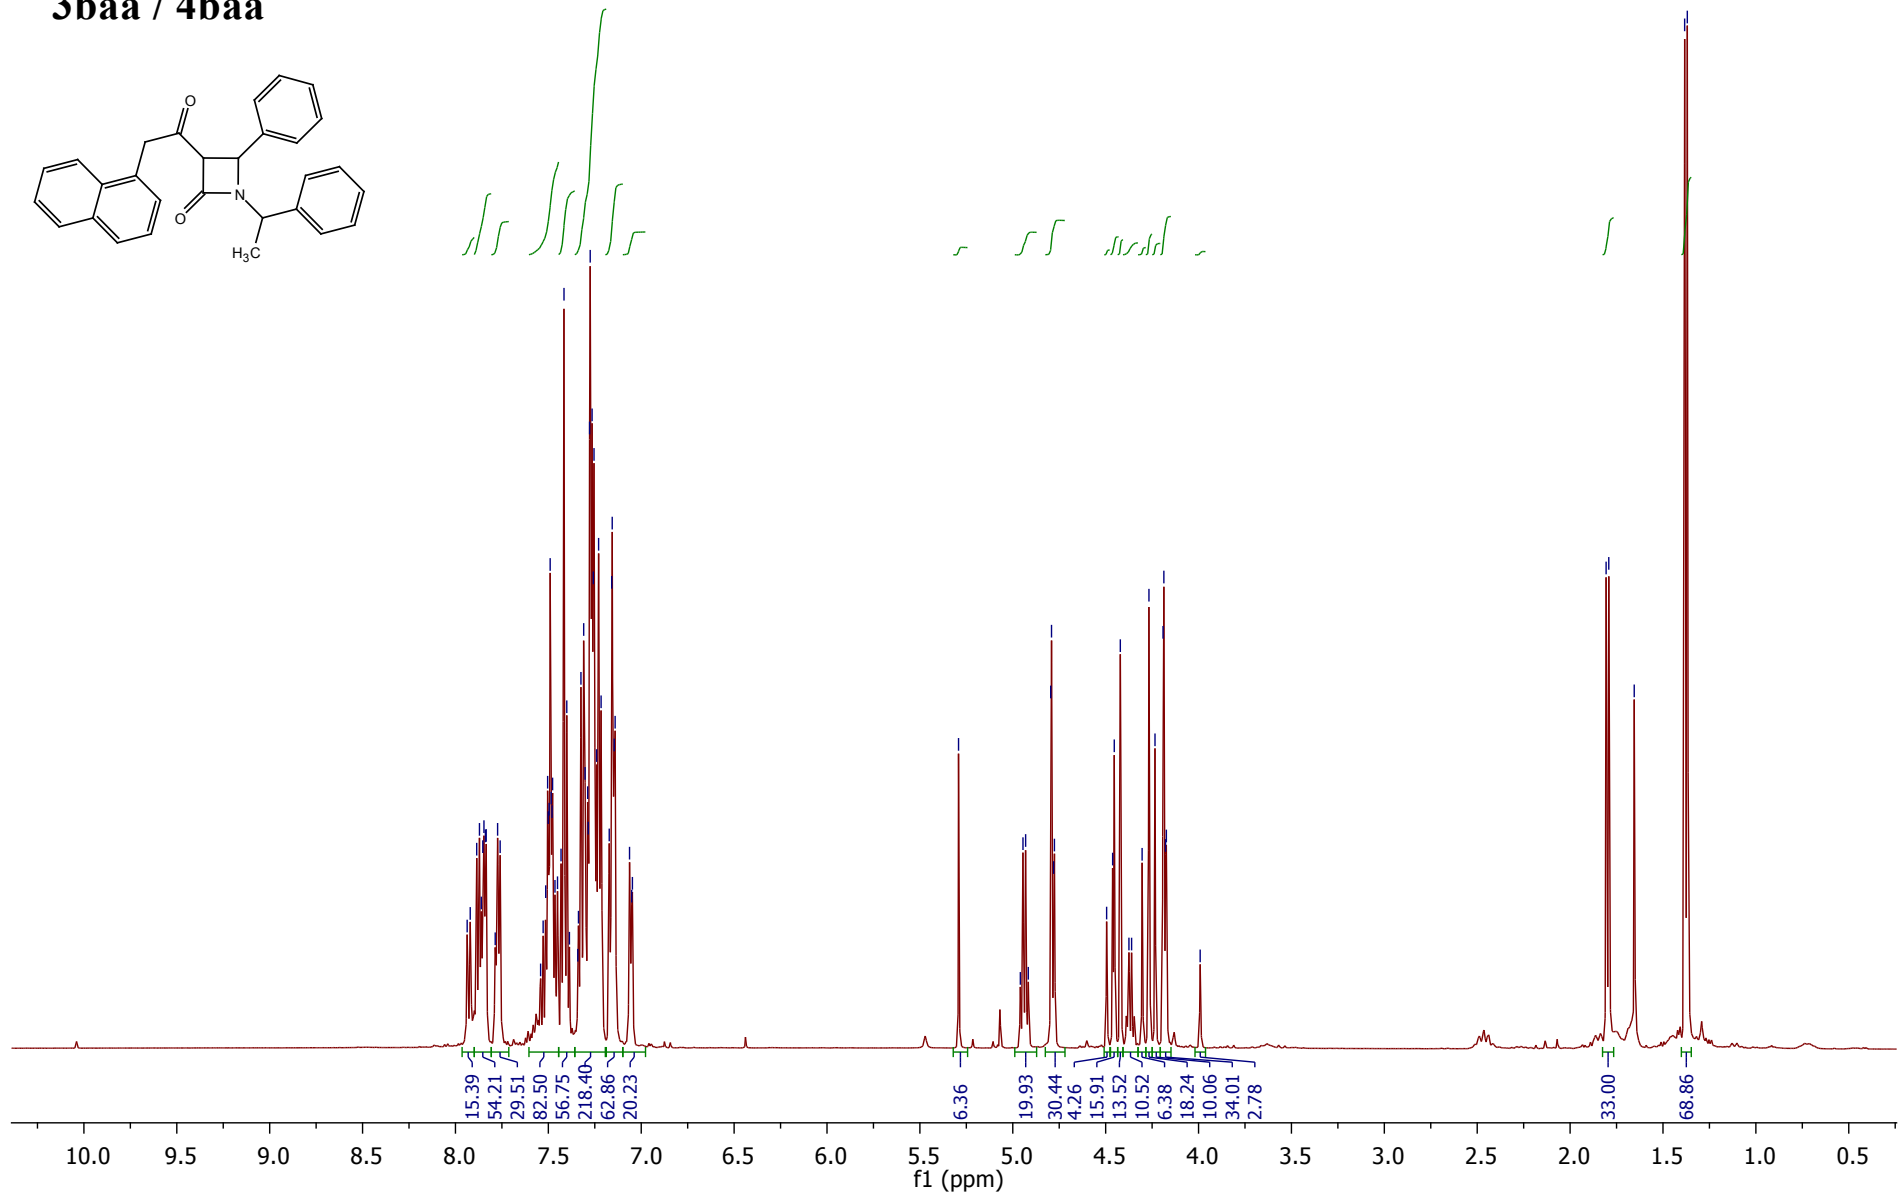

199.84  
199.52

### 3baa / 4baa

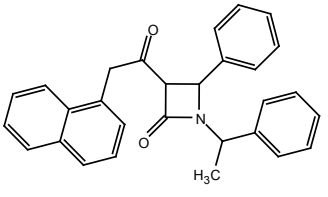

163.56  
140.78  
139.67  
137.87  
136.70  
134.08  
134.06  
132.48  
132.46  
129.88  
129.86  
129.06  
128.99  
128.93  
128.86  
128.84  
128.48  
128.13  
127.96  
127.38  
127.21  
127.06  
126.96  
126.83  
126.79  
126.12  
126.10  
125.82  
125.78  
124.18

77.60  
77.34  
77.09  
69.50  
69.48

55.89  
55.51  
55.12  
53.47  
48.12  
48.01

20.39  
19.39

1.32

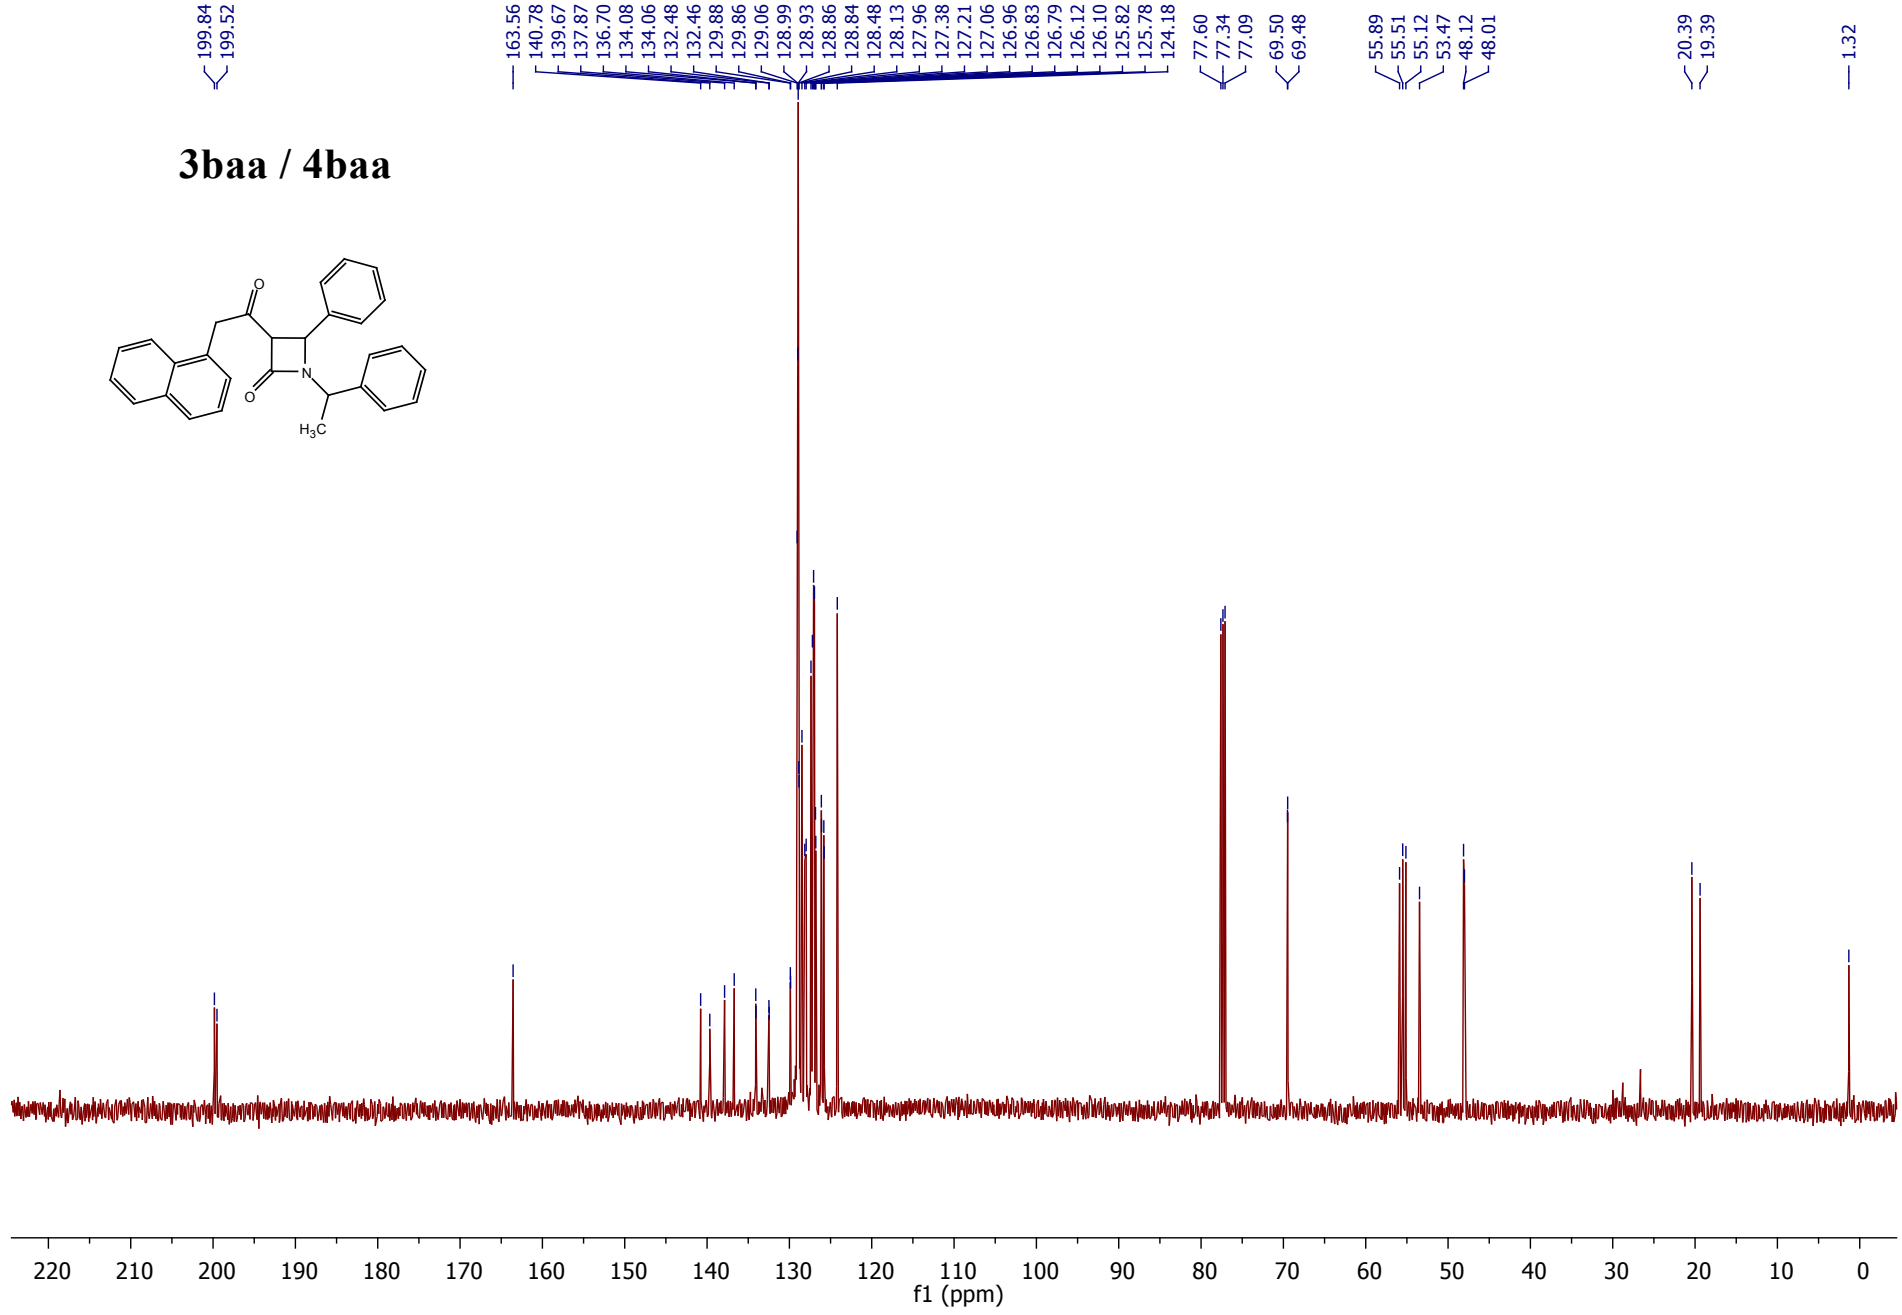

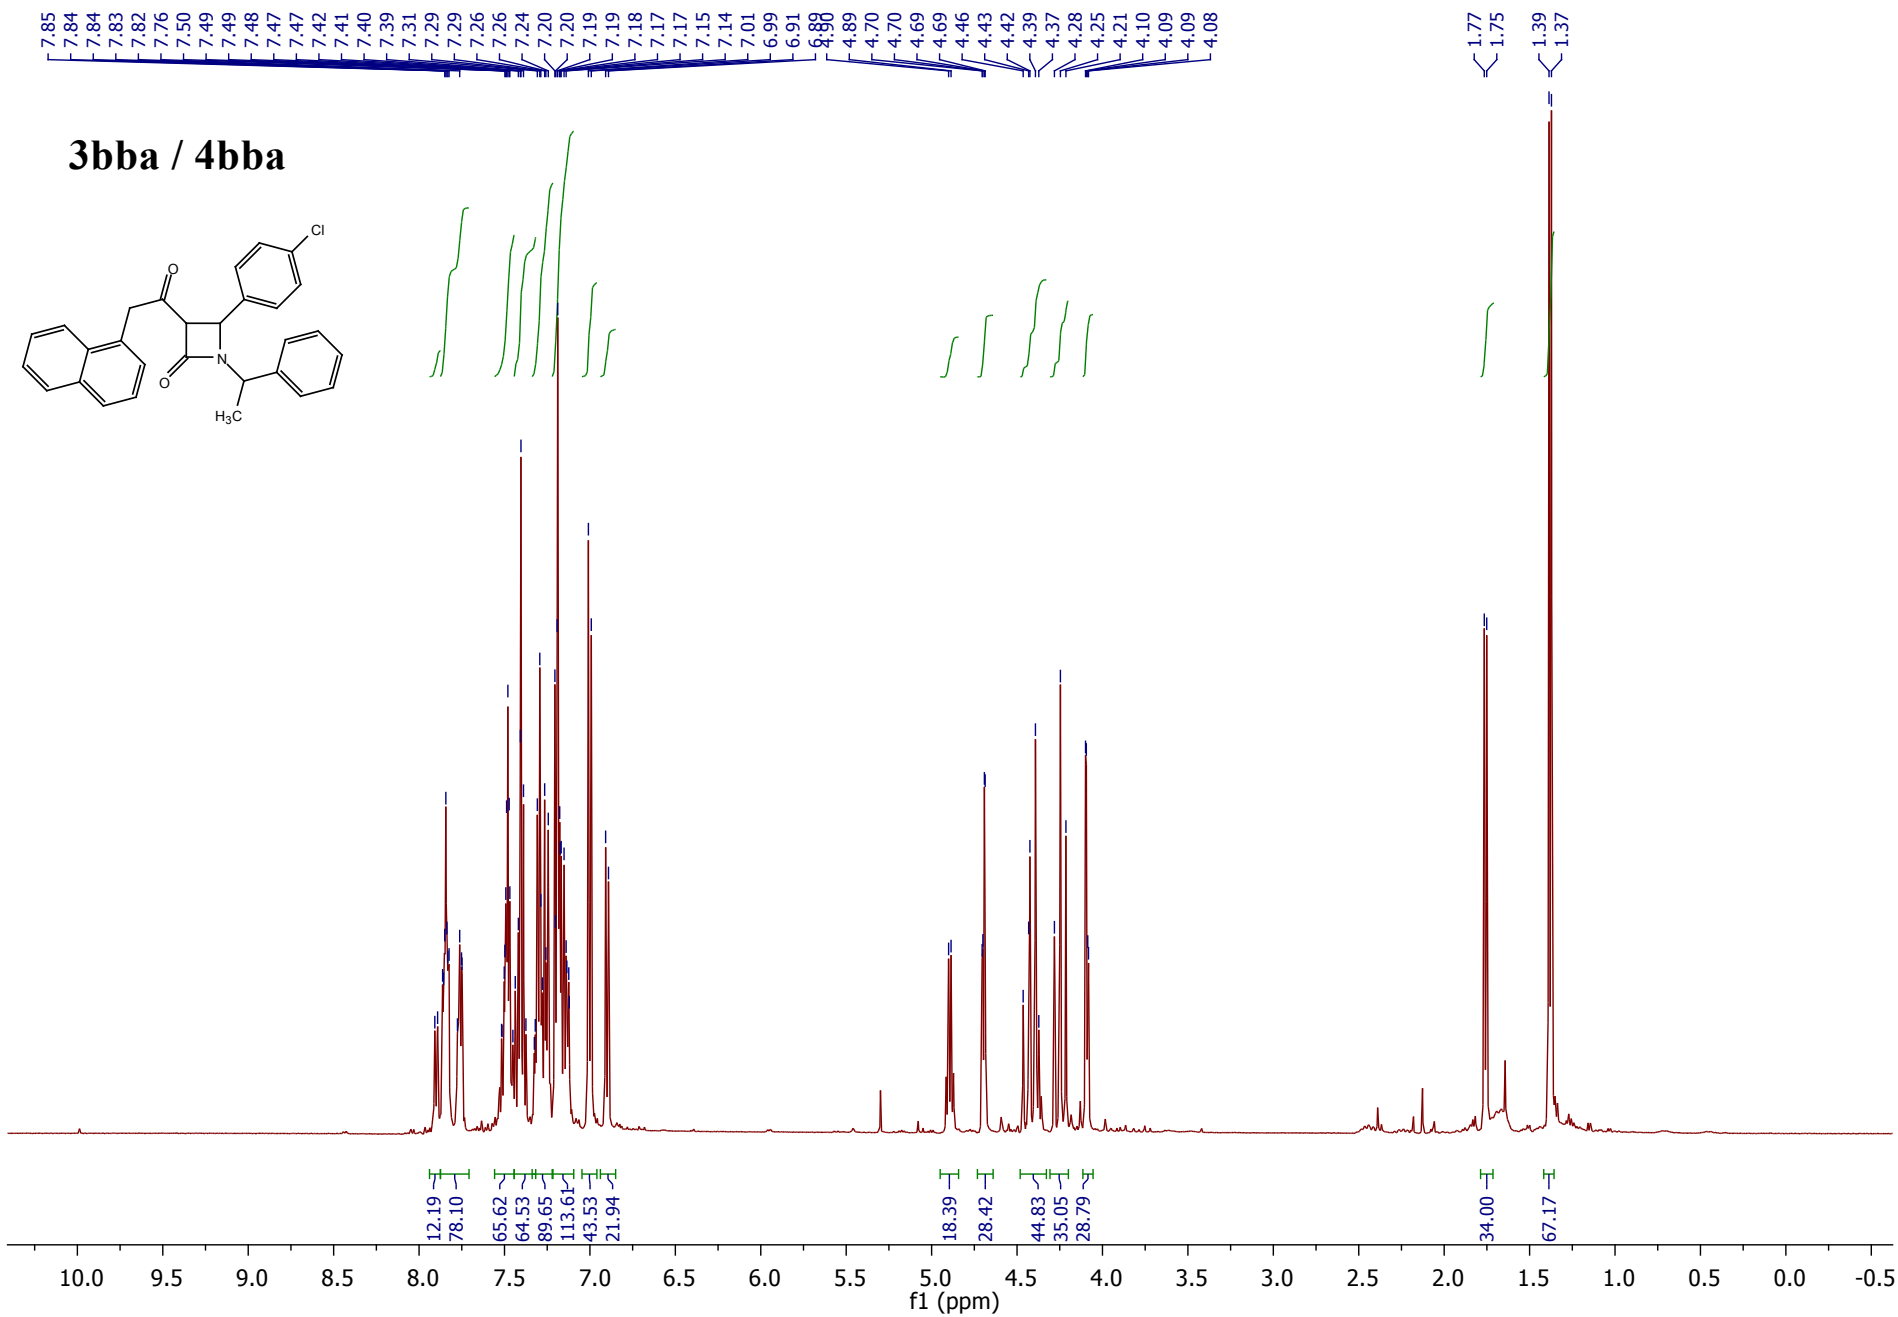



### 3bba / 4bba

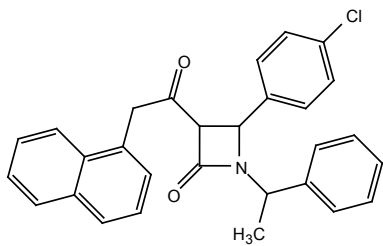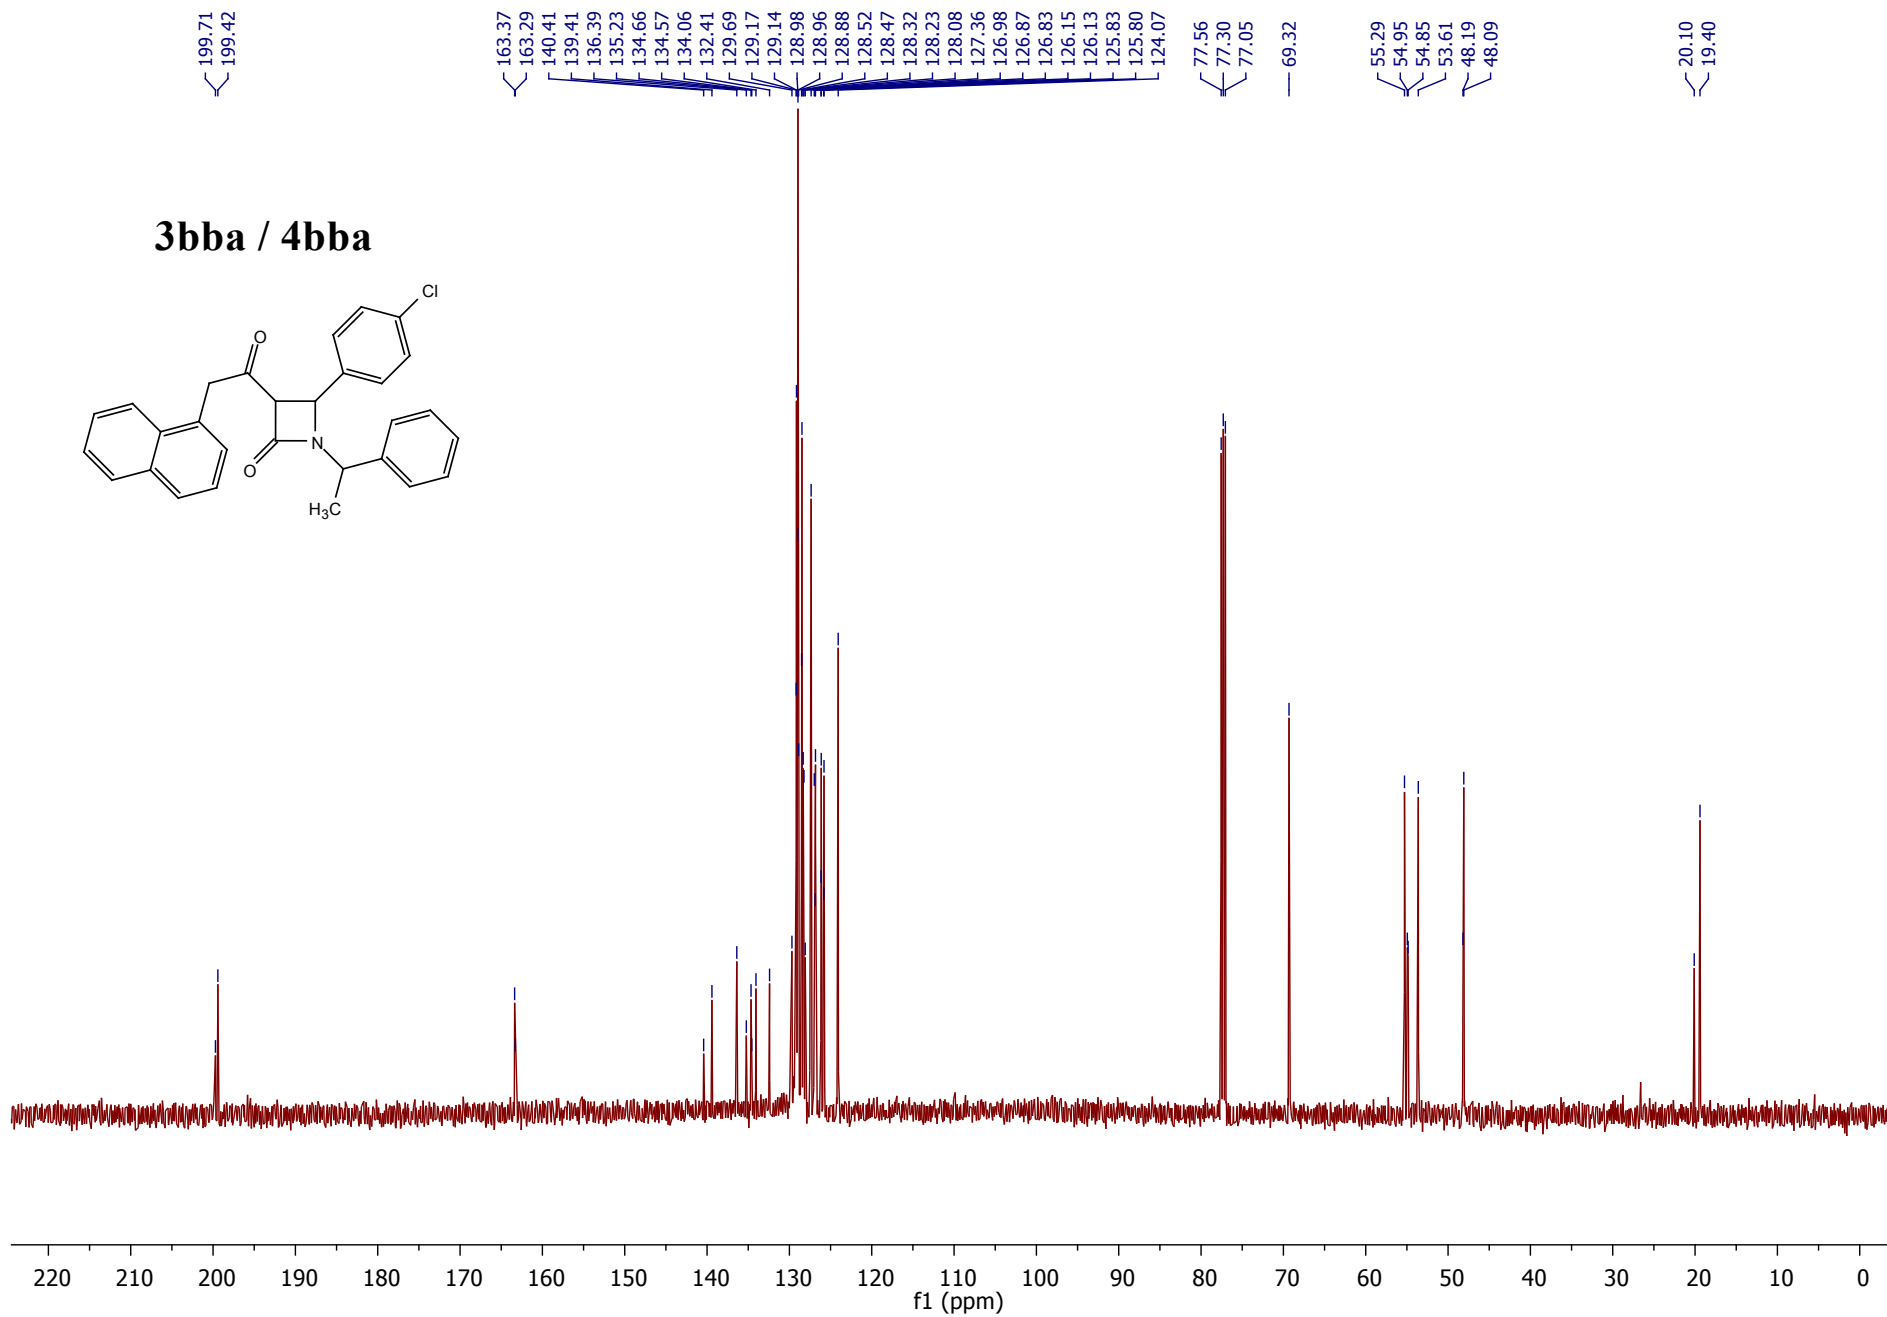

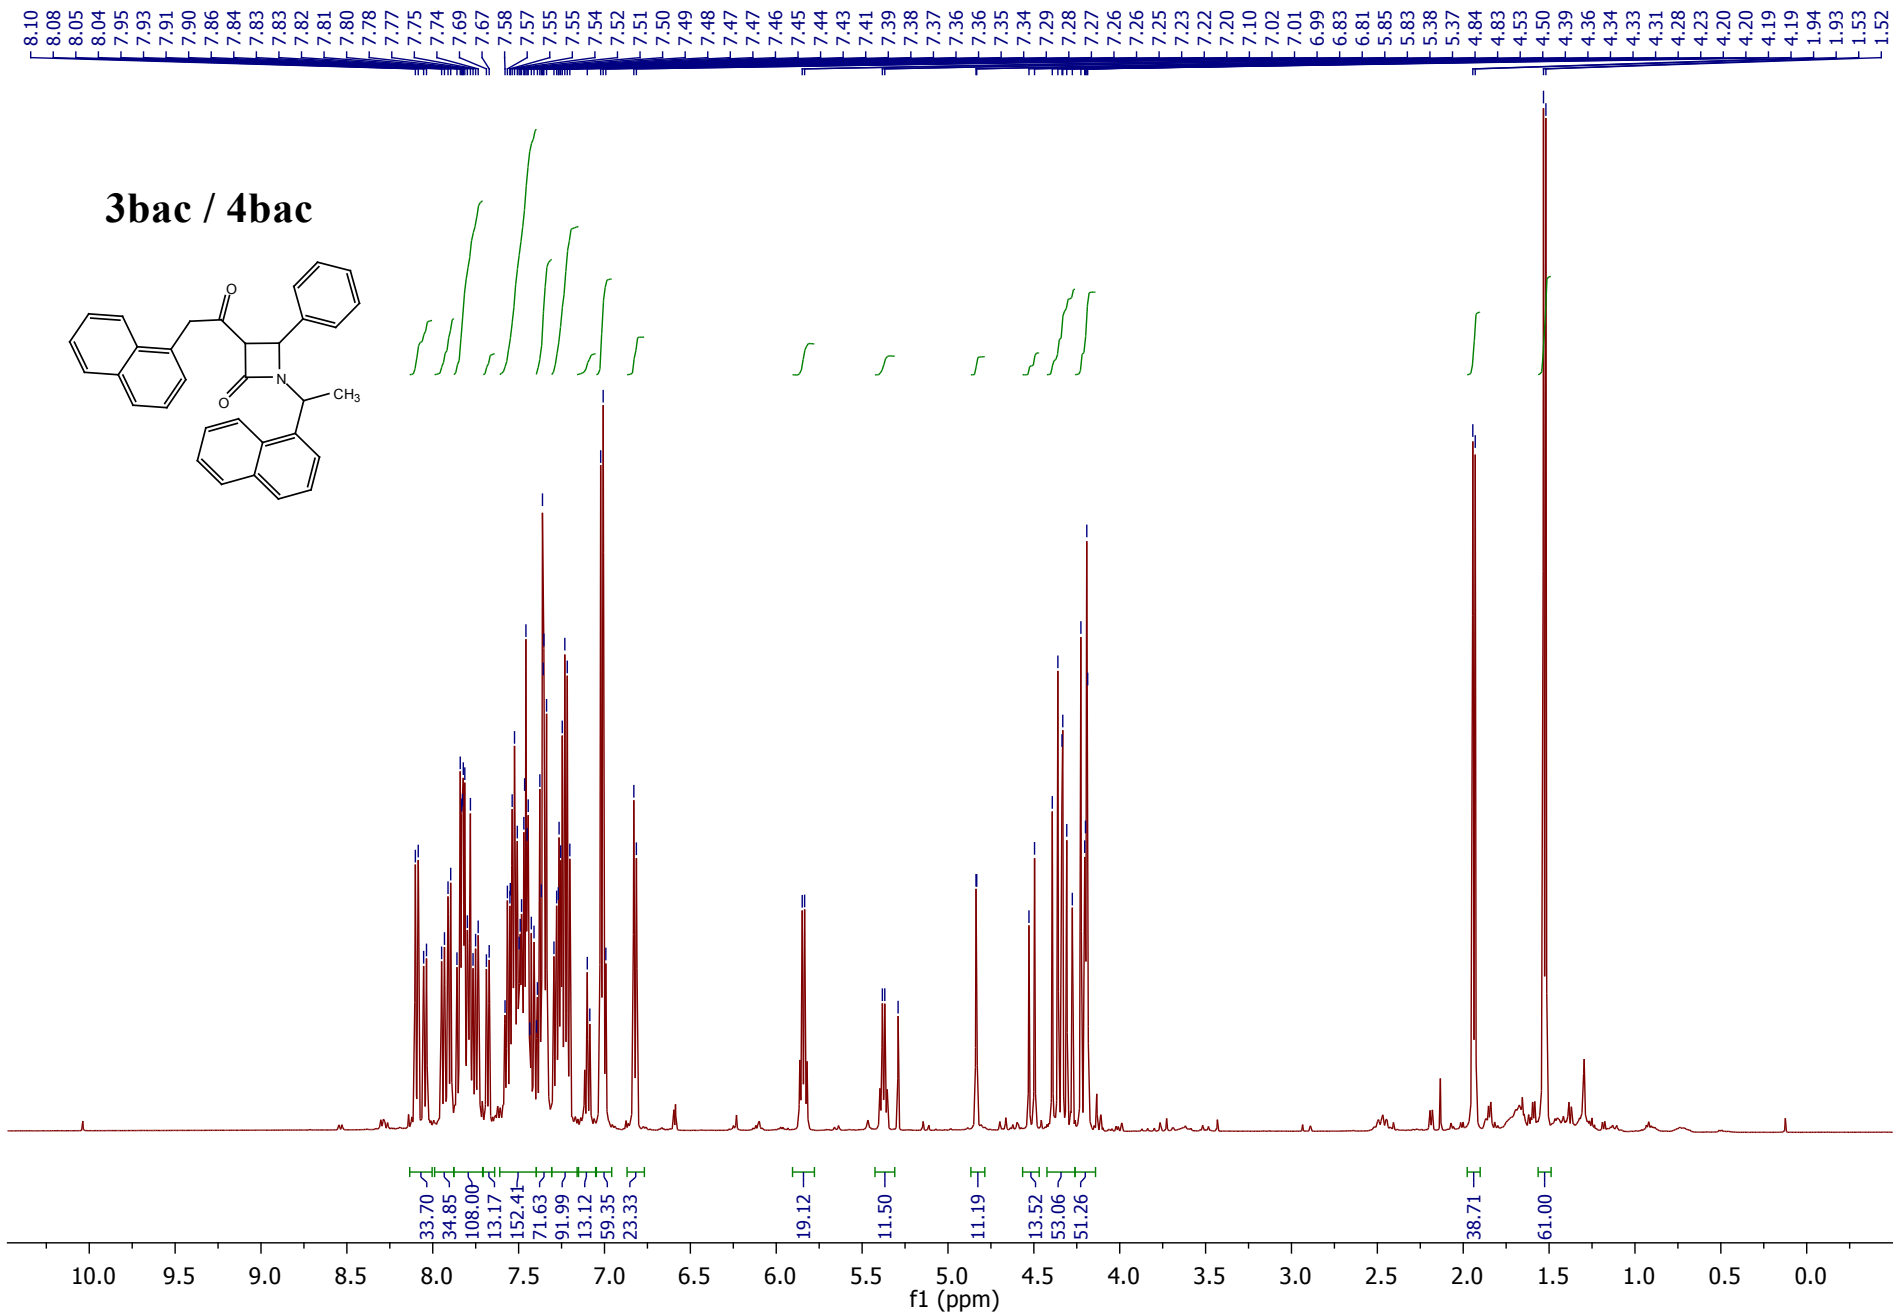

S34

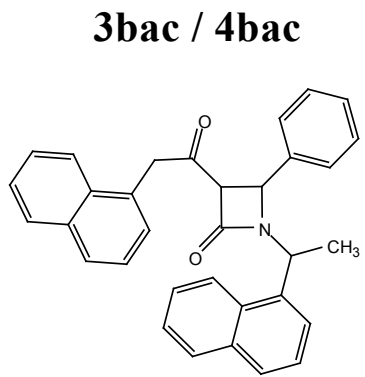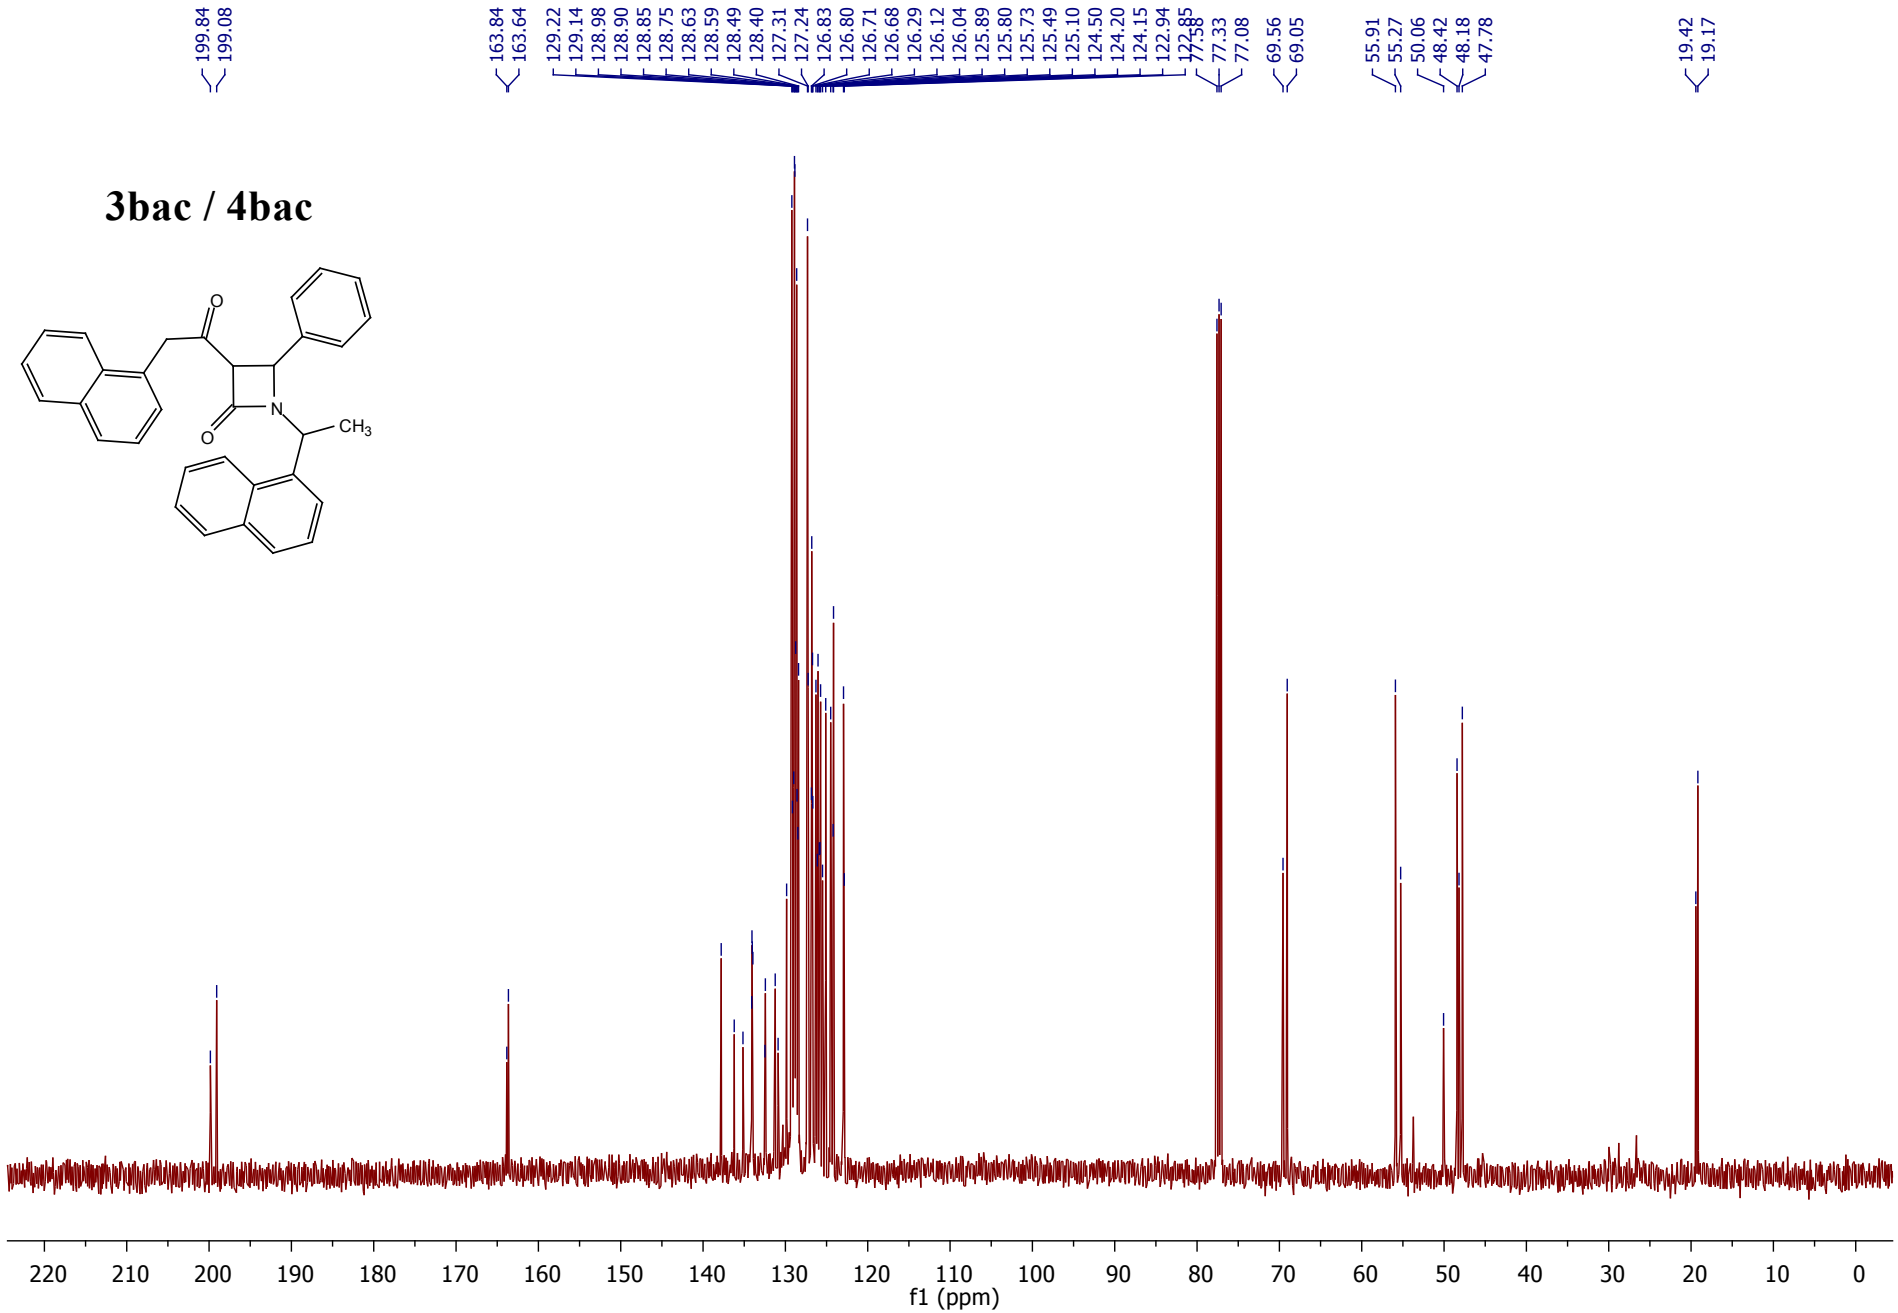

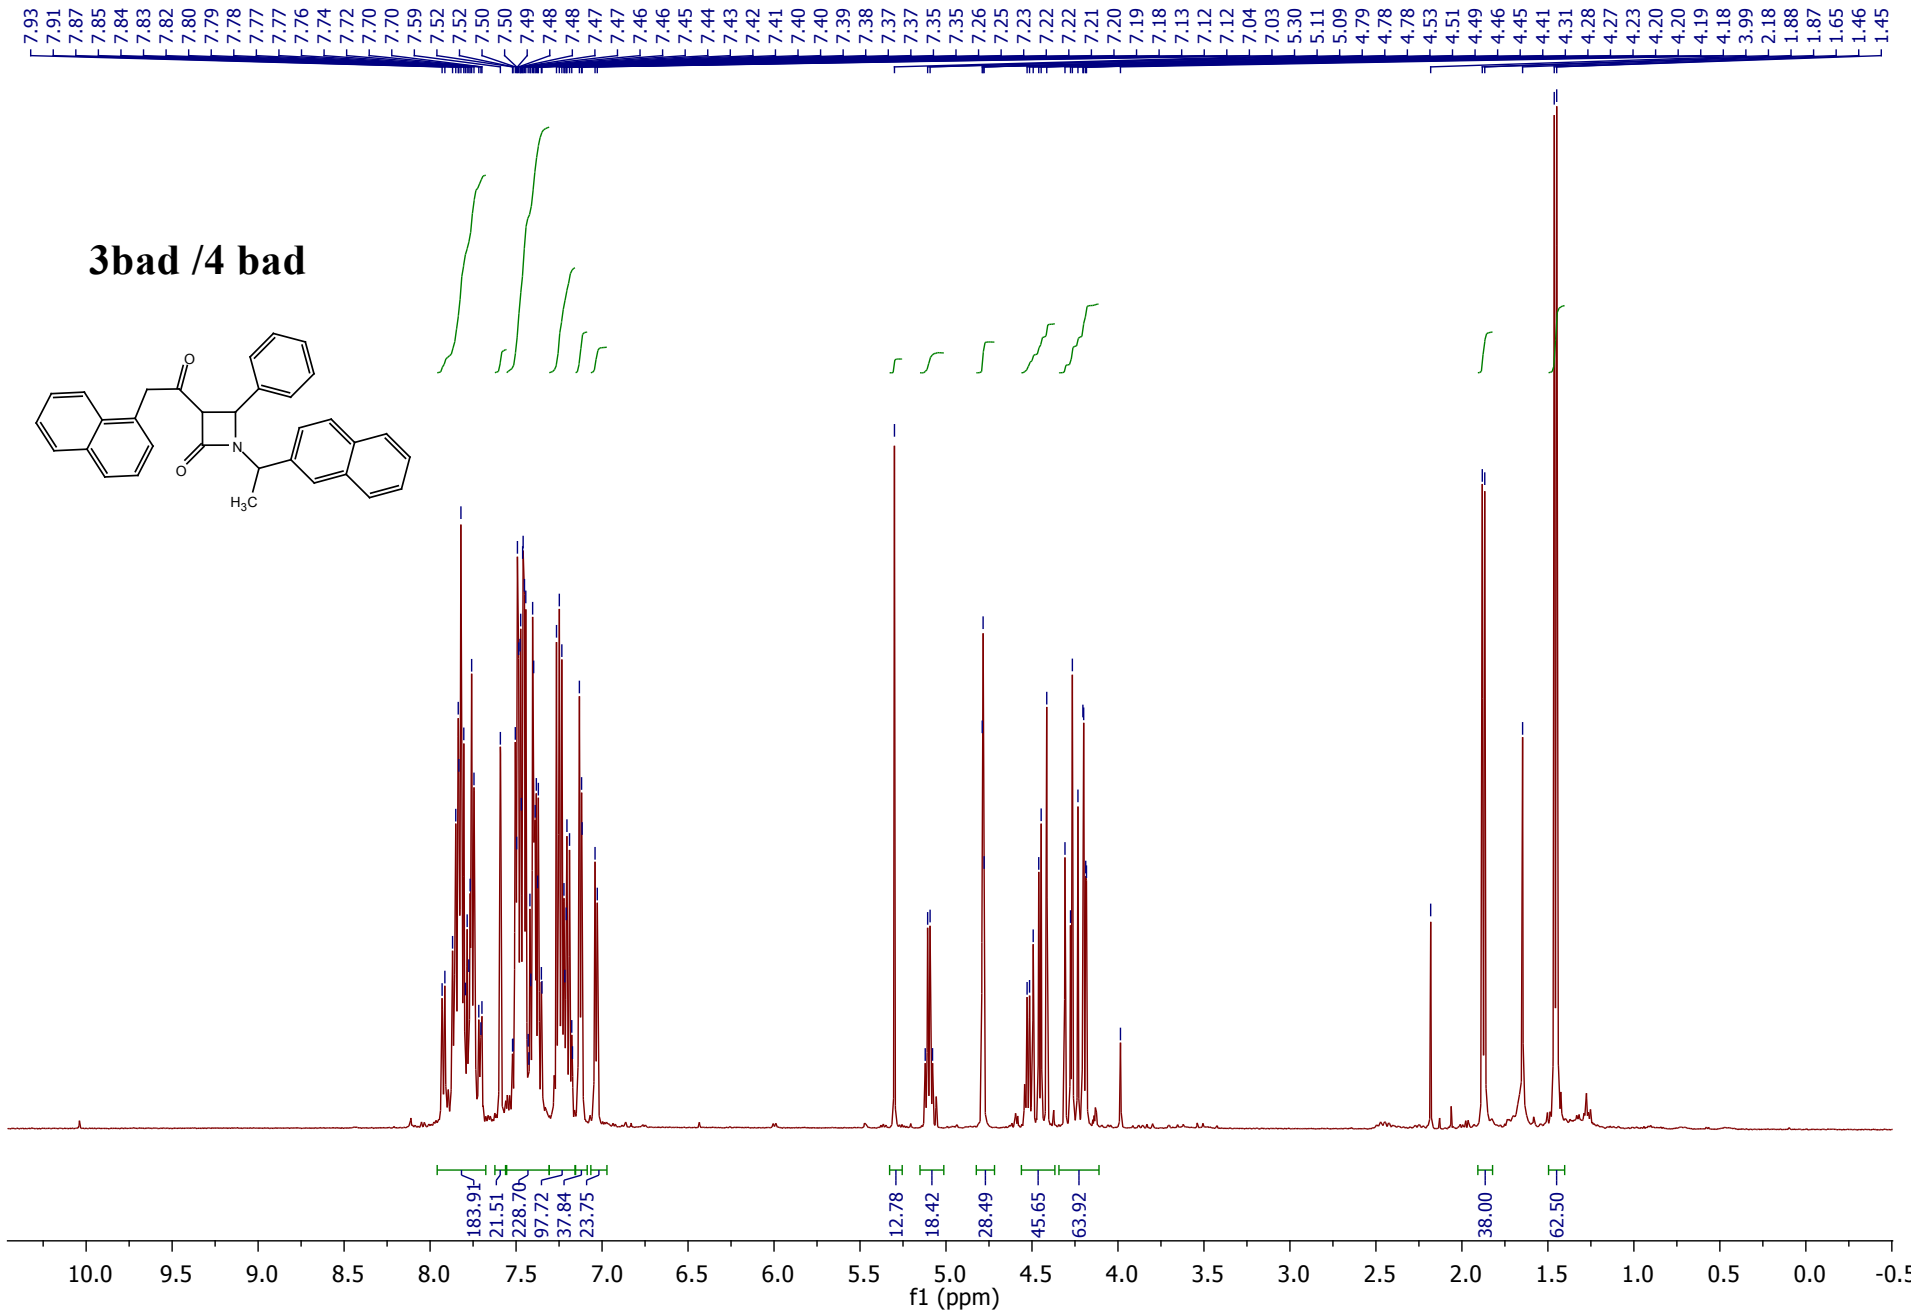

**3bad / 4bad**

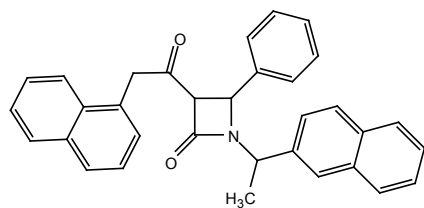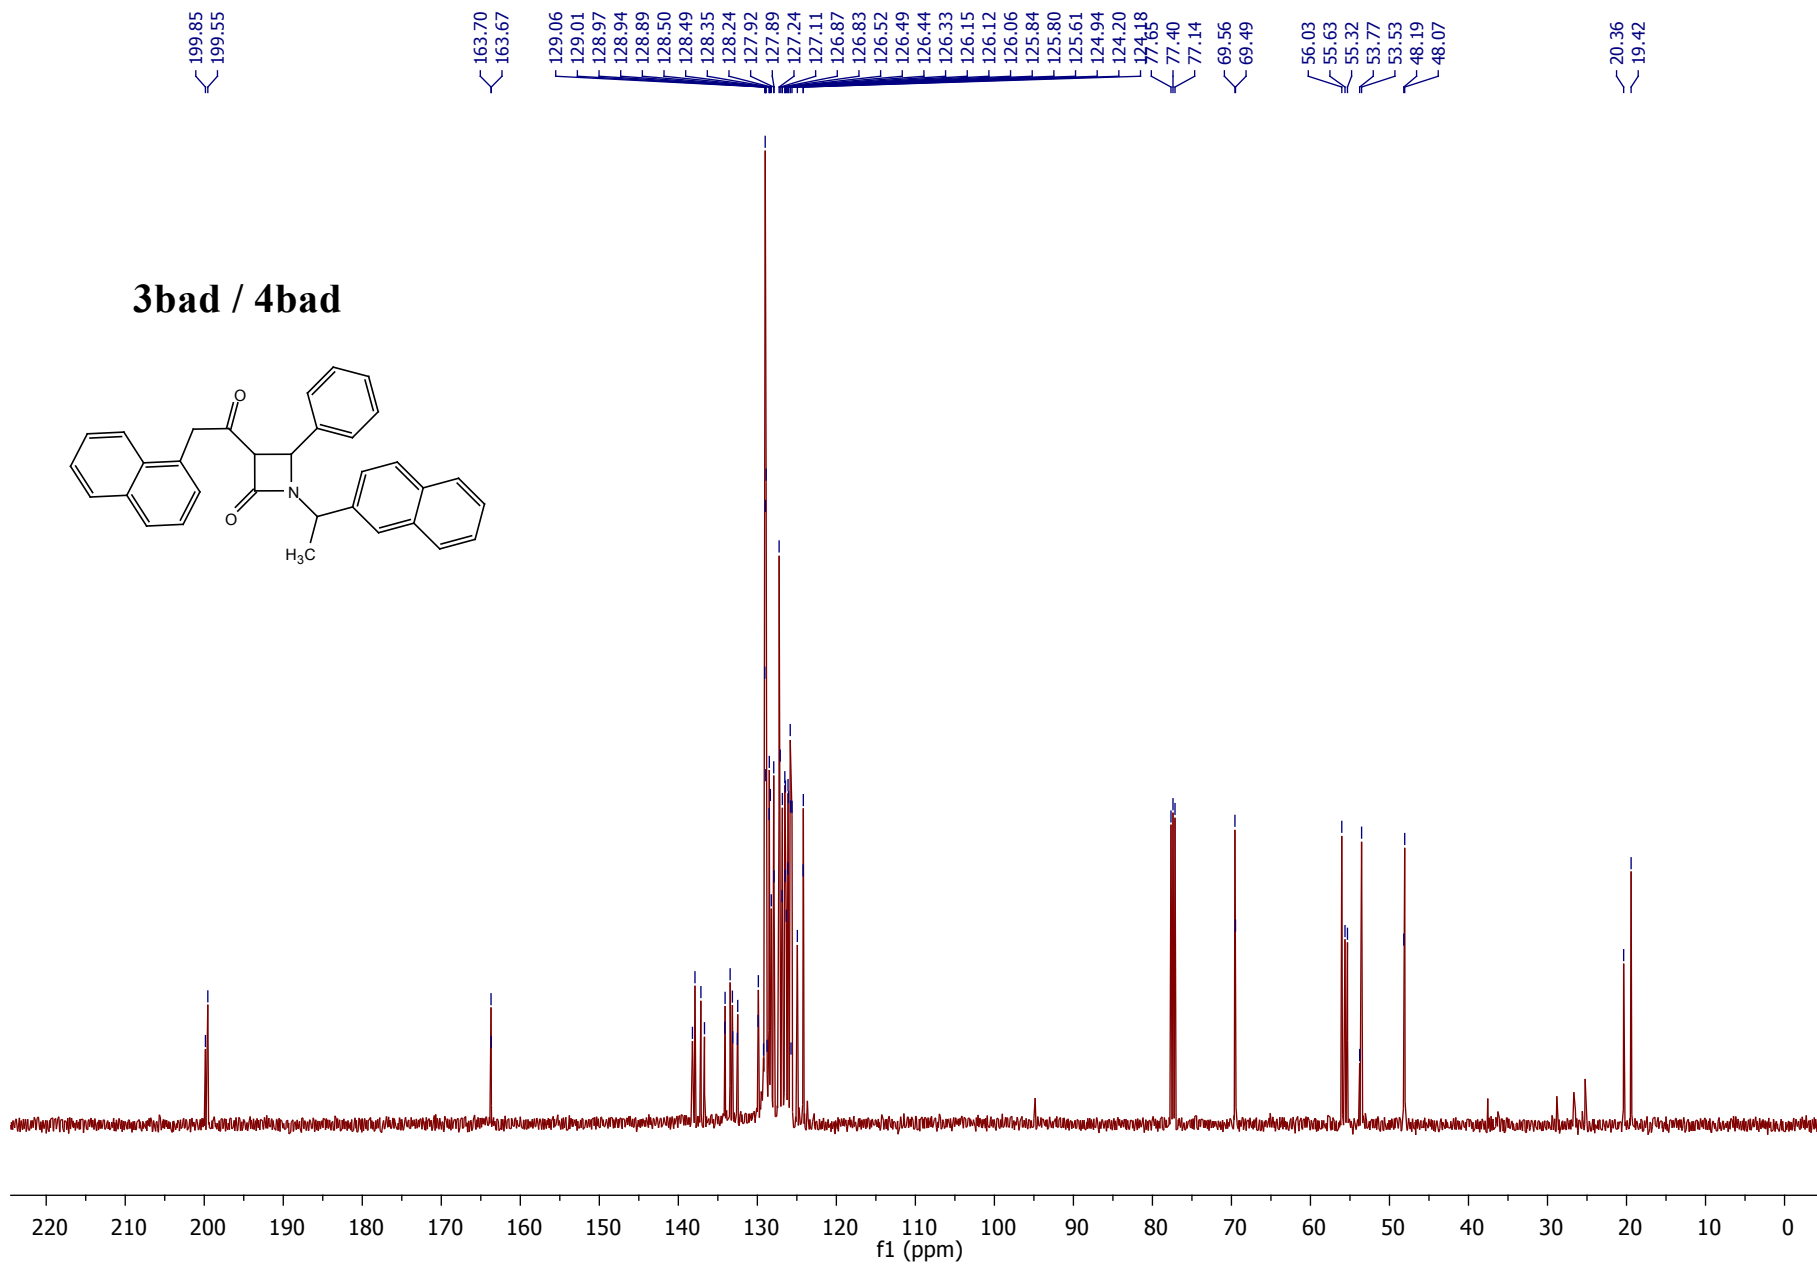

## References

- [1] Raillard, S. P.; Chen, W.; Sullivan, E.; Bajjalieh, W.; Bhandari, A.; Baer, T. A. *J. Comb. Chem.* **2002**, 4, 470.
- [2] Emtenäs, H.; Alderin, L.; Almqvist, F.; *J. Org. Chem.* **2001**, 66, 6756.
- [3] Boyer, N.; Gloanec, P.; Nanteuil, G.; Jubaulta, P.; Quiriona, J-Ch. *Tetrahedron* 2007, 63, 12352.
